# Supplementary material for: Reliability of Computing van der Waals Bond Lengths of Some Rare Gas Diatomics
Source: MDPI journal article supplement (doi:10.3390/ijms232213944), 2022-11-11
Supplement: s1 [file s1]

SI

# **Reliability of computing van der Waals bond lengths of some rare gas diatomics**

Yi-Liang Zhang\* and Bin Li

*(College of Chemistry, Jilin University, Qianjin Street 2699, Changchun 130012, China)*

*(\* Corresponding author: [yiliang@jlu.edu.cn](mailto:yiliang@jlu.edu.cn))*

## **Contents**

|                                                                                          |     |
|------------------------------------------------------------------------------------------|-----|
| Table S1. The numbers of 80 different basis sets.....                                    | S2  |
| Table S2. MADs (Å) of 11-RG-Mols calculated by 572 methods and 20 basis sets.....        | S3  |
| Table S3. MDs (Å) of 11-RG-Mols calculated by 572 methods and 20 basis sets.....         | S15 |
| Table S4. Imaginary frequencies (cm <sup>-1</sup> ) of 36 methods and 20 basis sets..... | S26 |
| Table S5. MADs (Å) of 11-RG-Mols calculated by 54 methods and 60 basis sets.....         | S31 |
| Table S6. MDs (Å) of 11-RG-Mols calculated by 54 methods and 60 basis sets.....          | S35 |
| Reference.....                                                                           | S38 |

Table S1. The numbers of 80 different basis sets.

|                    |                     |                      |                  |                    |
|--------------------|---------------------|----------------------|------------------|--------------------|
| BS01               | BS02                | BS03                 | BS04             | BS05               |
| Def2TZVP           | Def2TZVPP           | Def2QZVP             | Def2QZVPP        | 6-311G**           |
| BS06               | BS07                | BS08                 | BS09             | BS10               |
| 6-311++G(d,p)      | 6-311++G(2d,2p)     | 6-311++G(3d,3p)      | 6-311++G(df,pd)  | 6-311++G(2df,2pd)  |
| BS11               | BS12                | BS13                 | BS14             | BS15               |
| 6-311++G(3df,3pd)  | 6-311++G(3d2f,3p2d) | cc-pVDZ              | aug-cc-pVDZ      | cc-pVTZ            |
| BS16               | BS17                | BS18                 | BS19             | BS20               |
| aug-cc-pVTZ        | cc-pVQZ             | aug-cc-pVQZ          | cc-pV5Z          | aug-cc-pV5Z        |
|                    |                     |                      |                  |                    |
| BS21               | BS22                | BS23                 | BS24             | BS25               |
| SV                 | SVP                 | TZV                  | TZVP             | Def2SV             |
| BS26               | BS27                | BS28                 | BS29             | BS30               |
| Def2SVP            | Def2SVPP            | Def2TZV              | Def2QZV          | DGDZVP             |
| BS31               | BS32                | BS33                 | BS34             | BS35               |
| CEP-31G            | CEP-31++G           | CEP-121G             | CEP-121++G       | SDD                |
| BS36               | BS37                | BS38                 | BS39             | BS40               |
| SDDAll             | LanL2DZ             | LanL2MB              | STO-3G           | STO-6G             |
| BS41               | BS42                | BS43                 | BS44             | BS45               |
| CBSB7              | CBSB7++             | 3-21G*               | 6-31G            | 6-311G             |
| BS46               | BS47                | BS48                 | BS49             | BS50               |
| 6-31+G             | 6-311+G             | 6-31++G              | 6-311++G         | 6-31G(d)           |
| BS51               | BS52                | BS53                 | BS54             | BS55               |
| 6-31G(d,p)         | 6-31+G(d)           | 6-31++G(d)           | 6-31+G(d,p)      | 6-31++G(d,p)       |
| BS56               | BS57                | BS58                 | BS59             | BS60               |
| 6-311+G(d)         | 6-311++G(d)         | 6-311+G(d,p)         | 6-31G(df)        | 6-31+G(df)         |
| BS61               | BS62                | BS63                 | BS64             | BS65               |
| 6-31++G(df)        | 6-31+G(df,pd)       | 6-311+G(df,pd)       | 6-311++G(df)     | 6-31++G(2d,2p)     |
| BS66               | BS67                | BS68                 | BS69             | BS70               |
| 6-31++G(3d,3p)     | 6-31++G(df,pd)      | 6-31++G(2df,2pd)     | 6-31++G(3df,3pd) | 6-31++G(3d2f,3p2d) |
| BS71               | BS72                | BS73                 | BS74             | BS75               |
| 6-31G(d',p')       | 6-31++G(d',p')      | 6-31++G(2d',2p')     | 6-31++G(3d',3p') | 6-31++G(d'f,p'd)   |
| BS76               | BS77                | BS78                 | BS79             | BS80               |
| 6-31++G(2d'f,2p'd) | 6-31++G(3d'f,3p'd)  | 6-31++G(3d'2f,3p'2d) | UGBS             | UGBS1V++           |

Table S2. MADs (Å) of 11-RG-Mols calculated by 572 methods and 20 basis sets.<sup>a,b,c,d,e,f</sup>

|           | BS01         | BS02         | BS03         | BS04         | BS05         | BS06         | BS07         | BS08         | BS09         | BS10         | BS11         | BS12         | BS13         | BS14         | BS15         | BS16         | BS17         | BS18         | BS19         | BS20         | Ave          |
|-----------|--------------|--------------|--------------|--------------|--------------|--------------|--------------|--------------|--------------|--------------|--------------|--------------|--------------|--------------|--------------|--------------|--------------|--------------|--------------|--------------|--------------|
| HF        | 0.791        | 0.758        | 1.309        | 1.309        | 0.626        | 0.914        | 0.804        | 0.726        | 0.913        | 0.804        | 0.726        | 0.855        | 0.396        | 0.918        | 0.665        | 1.105        | 1.013        | 1.259        | 1.308        | 1.308        | <b>0.925</b> |
| APFD      | <b>0.094</b> | 0.100        | <b>0.012</b> | <b>0.012</b> | 0.178        | <b>0.005</b> | <b>0.045</b> | <b>0.054</b> | <b>0.006</b> | <b>0.047</b> | <b>0.056</b> | <b>0.012</b> | 0.271        | <b>0.025</b> | 0.127        | <b>0.023</b> | <b>0.053</b> | <b>0.012</b> | <b>0.012</b> | <b>0.013</b> | <b>0.058</b> |
| wB97      | 0.155        | 0.162        | 0.432        | 0.434        | 0.224        | 0.240        | 0.185        | 0.178        | 0.240        | 0.218        | 0.206        | 0.254        | 0.372        | 0.311        | 0.232        | 0.254        | 0.312        | 0.458        | 0.392        | 0.474        | <b>0.287</b> |
| wB97X     | 0.102        | 0.109        | <b>0.065</b> | <b>0.065</b> | 0.182        | <b>0.082</b> | <b>0.087</b> | <b>0.076</b> | <b>0.083</b> | <b>0.088</b> | <b>0.077</b> | <b>0.079</b> | 0.286        | 0.143        | 0.145        | <b>0.070</b> | <b>0.050</b> | <b>0.051</b> | <b>0.067</b> | <b>0.078</b> | <b>0.099</b> |
| wB97XD    | 0.294        | 0.292        | 0.381        | 0.381        | 0.210        | 0.355        | 0.335        | 0.319        | 0.355        | 0.334        | 0.319        | 0.357        | 0.143        | 0.343        | 0.251        | 0.370        | 0.333        | 0.393        | 0.378        | 0.393        | <b>0.327</b> |
| B98       | 0.139        | 0.144        | 0.145        | 0.145        | 0.227        | 0.136        | 0.127        | 0.119        | 0.135        | 0.127        | 0.120        | 0.138        | 0.262        | 0.135        | 0.176        | 0.141        | 0.136        | 0.147        | 0.144        | 0.143        | <b>0.149</b> |
| B971      | 0.159        | 0.161        | 0.121        | 0.121        | 0.245        | 0.126        | 0.137        | 0.148        | 0.127        | 0.137        | 0.149        | 0.133        | 0.283        | 0.112        | 0.199        | 0.120        | 0.152        | 0.124        | 0.123        | 0.122        | <b>0.150</b> |
| B972      | 0.367        | 0.359        | 0.495        | 0.495        | 0.308        | 0.471        | 0.431        | 0.397        | 0.471        | 0.429        | 0.396        | 0.484        | 0.235        | 0.456        | 0.310        | 0.507        | 0.401        | 0.514        | 0.494        | 0.506        | <b>0.426</b> |
| BHandH    | 0.527        | 0.528        | 0.519        | 0.519        | 0.555        | 0.521        | 0.534        | 0.532        | 0.523        | 0.536        | 0.534        | 0.507        | 0.610        | 0.540        | 0.534        | 0.525        | 0.523        | 0.522        | 0.521        | 0.522        | <b>0.532</b> |
| BHandHLYP | 0.205        | 0.205        | 0.605        | 0.604        | 0.364        | 0.662        | 0.279        | 0.259        | 0.584        | 0.266        | 0.259        | 0.450        | 0.344        | 0.278        | 0.452        | 0.604        | 0.590        | 0.665        | 0.651        | 0.654        | <b>0.449</b> |
| HFS       | 0.359        | 0.362        | 0.311        | 0.311        | 0.401        | 0.295        | 0.324        | 0.326        | 0.297        | 0.327        | 0.329        | 0.274        | 0.498        | 0.322        | 0.379        | 0.320        | 0.334        | 0.313        | 0.316        | 0.309        | <b>0.335</b> |
| HFB       | 1.977        | 1.983        | 2.233        | 2.234        | 1.485        | 2.159        | 2.160        | 2.112        | 2.231        | 2.185        | 2.109        | 2.163        | 1.504        | 2.282        | 1.831        | 2.262        | 2.061        | 2.374        | 2.287        | 2.521        | <b>2.108</b> |
| XAlpha    | 0.412        | 0.414        | 0.378        | 0.378        | 0.446        | 0.363        | 0.390        | 0.391        | 0.366        | 0.393        | 0.394        | 0.340        | 0.533        | 0.391        | 0.427        | 0.387        | 0.393        | 0.380        | 0.381        | 0.378        | <b>0.397</b> |
| LSDA      | 0.504        | 0.506        | 0.488        | 0.488        | 0.526        | 0.473        | 0.497        | 0.497        | 0.477        | 0.500        | 0.501        | 0.449        | 0.595        | 0.502        | 0.514        | 0.496        | 0.496        | 0.491        | 0.491        | 0.491        | <b>0.499</b> |
| LC-LSDA   | 0.166        | 0.174        | 0.396        | 0.396        | 0.259        | 0.354        | 0.294        | 0.266        | 0.355        | 0.294        | 0.265        | 0.355        | 0.274        | 0.355        | 0.237        | 0.325        | 0.267        | 0.408        | 0.394        | 0.419        | <b>0.312</b> |
| HCTH      | 0.210        | 0.211        | 0.186        | 0.186        | 0.271        | 0.184        | 0.187        | 0.190        | 0.184        | 0.187        | 0.190        | 0.186        | 0.310        | 0.192        | 0.238        | 0.180        | 0.204        | 0.183        | 0.187        | 0.186        | <b>0.203</b> |
| HCTH93    | 0.853        | 0.850        | 1.098        | 1.099        | 0.612        | 1.097        | 1.080        | 1.022        | 1.093        | 1.083        | 1.024        | 1.065        | 0.490        | 0.951        | 0.735        | 1.179        | 0.882        | 1.195        | 1.184        | 1.256        | <b>0.992</b> |
| HCTH147   | 0.189        | 0.193        | 0.214        | 0.214        | 0.234        | 0.206        | 0.199        | 0.185        | 0.205        | 0.198        | 0.185        | 0.212        | 0.263        | 0.223        | 0.172        | 0.229        | 0.181        | 0.221        | 0.215        | 0.214        | <b>0.208</b> |
| tHCTH     | 0.189        | 0.191        | 0.202        | 0.202        | 0.222        | 0.180        | 0.174        | 0.160        | 0.179        | 0.174        | 0.159        | 0.183        | 0.265        | 0.183        | 0.174        | 0.208        | 0.180        | 0.213        | 0.199        | 0.198        | <b>0.192</b> |
| tHCTHhyb  | 0.212        | 0.213        | 0.307        | 0.307        | 0.225        | 0.284        | 0.253        | 0.239        | 0.283        | 0.251        | 0.238        | 0.300        | 0.223        | 0.291        | 0.183        | 0.315        | 0.228        | 0.309        | 0.296        | 0.300        | <b>0.263</b> |
| VSXC      | 0.198        | 0.198        | 0.160        | 0.160        | 0.265        | 0.163        | 0.199        | 0.200        | 0.163        | 0.200        | 0.200        | 0.161        | 0.333        | 0.209        | 0.228        | 0.185        | 0.159        | 0.179        | 0.162        | 0.185        | <b>0.195</b> |
| BMK       | 1.669        | 1.667        | 1.810        | 1.881        | 1.411        | 1.494        | 1.497        | 1.419        | 1.515        | 1.458        | 1.447        | 1.536        | 1.097        | 1.682        | 1.676        | 1.605        | 1.746        | 1.719        | 1.866        | 1.969        | <b>1.608</b> |
| TPSSh     | 0.232        | 0.233        | 0.280        | 0.280        | 0.277        | 0.264        | 0.248        | 0.235        | 0.262        | 0.247        | 0.235        | 0.271        | 0.267        | 0.274        | 0.233        | 0.299        | 0.248        | 0.312        | 0.277        | 0.277        | <b>0.263</b> |
| APF       | 0.507        | 0.470        | 0.835        | 0.835        | 0.481        | 0.797        | 0.699        | 0.606        | 0.799        | 0.725        | 0.602        | 0.800        | 0.389        | 0.738        | 0.442        | 0.907        | 0.702        | 0.908        | 0.846        | 0.898        | <b>0.699</b> |
| OAPF      | 0.169        | 0.175        | 0.243        | 0.245        | 0.277        | 0.236        | 0.201        | 0.185        | 0.235        | 0.199        | 0.183        | 0.247        | 0.283        | 0.242        | 0.213        | 0.254        | 0.205        | 0.247        | 0.241        | 0.244        | <b>0.226</b> |
| GVB(0)    | 0.768        | 0.768        | 1.287        | 1.287        | 0.632        | 0.923        | 0.792        | 0.718        | 0.923        | 0.792        | 0.717        | 0.865        | 0.386        | 0.897        | 0.664        | 1.090        | 1.016        | 1.247        | 1.285        | 1.276        | <b>0.917</b> |
| B97D      | <b>0.064</b> | <b>0.066</b> | 0.147        | 0.147        | 0.139        | 0.163        | 0.139        | 0.132        | 0.162        | 0.138        | 0.131        | 0.173        | 0.168        | 0.158        | <b>0.088</b> | 0.174        | <b>0.078</b> | 0.159        | 0.142        | 0.137        | <b>0.135</b> |
| B97D3     | 0.114        | 0.116        | 0.199        | 0.200        | 0.121        | 0.209        | 0.172        | 0.162        | 0.208        | 0.172        | 0.161        | 0.226        | 0.148        | 0.210        | <b>0.082</b> | 0.224        | 0.138        | 0.213        | 0.196        | 0.198        | <b>0.173</b> |
| B3LYP     | 0.982        | 1.057        | 1.864        | 1.910        | 1.099        | 1.416        | 1.190        | 1.069        | 1.380        | 1.195        | 1.074        | 1.349        | 0.636        | 1.142        | 1.099        | 1.772        | 1.174        | 1.910        | 1.828        | 1.990        | <b>1.357</b> |
| B3P86     | 1.725        | 1.698        | 2.019        | 2.020        | 1.307        | 1.734        | 1.661        | 1.580        | 1.697        | 1.656        | 1.581        | 1.737        | 1.363        | 1.767        | 1.721        | 1.861        | 1.807        | 2.106        | 2.034        | 2.151        | <b>1.761</b> |
| B3PW91    | 1.676        | 1.654        | 2.031        | 2.010        | 1.227        | 1.650        | 1.611        | 1.530        | 1.627        | 1.611        | 1.536        | 1.651        | 1.359        | 1.588        | 1.587        | 1.826        | 1.749        | 2.059        | 1.966        | 2.077        | <b>1.701</b> |
| X3LYP     | 0.203        | 0.207        | 0.218        | 0.218        | 0.338        | 0.224        | 0.203        | 0.215        | 0.231        | 0.202        | 0.215        | 0.257        | 0.349        | 0.209        | 0.279        | 0.225        | 0.217        | 0.213        | 0.219        | 0.219        | <b>0.233</b> |
| O3LYP     | 0.290        | 0.290        | 0.400        | 0.400        | 0.332        | 0.385        | 0.369        | 0.352        | 0.385        | 0.371        | 0.351        | 0.387        | 0.315        | 0.350        | 0.289        | 0.455        | 0.332        | 0.421        | 0.409        | 0.411        | <b>0.365</b> |
| B1LYP     | 1.149        | 1.000        | 1.803        | 1.828        | 1.087        | 1.444        | 1.186        | 1.145        | 1.472        | 1.211        | 1.159        | 1.439        | 0.779        | 1.255        | 1.170        | 1.724        | 1.287        | 2.103        | 1.741        | 2.047        | <b>1.402</b> |
| B1B95     | 0.212        | 0.212        | 0.278        | 0.278        | 0.213        | 0.410        | 0.367        | 0.302        | 0.410        | 0.367        | 0.302        | 0.431        | 0.184        | 0.230        | 0.180        | 0.444        | 0.252        | 0.280        | 0.245        | 0.315        | <b>0.296</b> |
| OmPW1LYP  | 0.258        | 0.259        | 0.235        | 0.235        | 0.341        | 0.248        | 0.251        | 0.252        | 0.248        | 0.252        | 0.253        | 0.253        | 0.377        | 0.246        | 0.298        | 0.235        | 0.257        | 0.234        | 0.237        | 0.234        | <b>0.260</b> |
| LG1LYP    | 0.321        | 0.322        | 0.293        | 0.293        | 0.370        | 0.293        | 0.303        | 0.304        | 0.294        | 0.305        | 0.306        | 0.292        | 0.444        | 0.296        | 0.340        | 0.293        | 0.306        | 0.297        | 0.295        | 0.295        | <b>0.313</b> |
| mPW1LYP   | 0.253        | 0.254        | 0.227        | 0.226        | 0.339        | 0.242        | 0.245        | 0.246        | 0.242        | 0.245        | 0.247        | 0.247        | 0.374        | 0.237        | 0.294        | 0.228        | 0.250        | 0.226        | 0.229        | 0.226        | <b>0.254</b> |
| mPW1PW91  | 0.376        | 0.369        | 0.511        | 0.511        | 0.341        | 0.505        | 0.461        | 0.405        | 0.504        | 0.459        | 0.404        | 0.501        | 0.282        | 0.440        | 0.324        | 0.540        | 0.420        | 0.532        | 0.512        | 0.523        | <b>0.446</b> |
| mPW1PBE   | 0.385        | 0.377        | 0.519        | 0.519        | 0.342        | 0.512        | 0.468        | 0.425        | 0.509        | 0.467        | 0.427        | 0.511        | 0.283        | 0.450        | 0.329        | 0.550        | 0.431        | 0.542        | 0.517        | 0.533        | <b>0.455</b> |
| mPW3PBE   | 0.310        | 0.310        | 0.461        | 0.461        | 0.325        | 0.439        | 0.391        | 0.363        | 0.439        | 0.390        | 0.362        | 0.444        | 0.270        | 0.398        | 0.286        | 0.475        | 0.353        | 0.486        | 0.458        | 0.477        | <b>0.395</b> |
| PBE1PBE   | 0.148        | 0.152        | 0.155        | 0.155        | 0.236        | 0.148        | 0.130        | 0.122        | 0.142        | 0.129        | 0.121        | 0.160        | 0.271        | 0.145        | 0.178        | 0.147        | 0.144        | 0.154        | 0.153        | 0.153        | <b>0.157</b> |
| PBEh1PBE  | 0.146        | 0.151        | 0.151        | 0.151        | 0.236        | 0.140        | 0.129        | 0.123        | 0.139        | 0.128        | 0.121        | 0.149        | 0.272        | 0.146        | 0.184        | 0.146        | 0.142        | 0.152        | 0.150        | 0.150        | <b>0.155</b> |
| HSEh1PBE  | 0.145        | 0.147        | 0.144        | 0.144        | 0.237        | 0.136        | 0.128        | 0.123        | 0.136        | 0.128        | 0.123        | 0.146        | 0.273        | 0.137        | 0.185        | 0.141        | 0.139        | 0.145        | 0.141        | 0.143        | <b>0.152</b> |
| OHSE1PBE  | 0.144        | 0.148        | 0.142        | 0.142        | 0.237        | 0.136        | 0.128        | 0.122        | 0.136        | 0.128        | 0.122        | 0.144        | 0.273        | 0.138        | 0.185        | 0.141        | 0.139        | 0.145        | 0.138        | 0.141        | <b>0.151</b> |
| OHSE2PBE  | 0.139        | 0.142        | 0.139        | 0.139        | 0.238        | 0.135        | 0.131        | 0.128        | 0.134        | 0.130        | 0.128        | 0.144        | 0.278        | 0.126        | 0.187        | 0.135        | 0.137        | 0.140        | 0.139        | 0.139        | <b>0.150</b> |
| HISSbPBE  | 0.124        | 0.126        | 0.138        | 0.138        | 0.213        | 0.128        | 0.123        | 0.107        | 0.128        | 0.121        | 0.106        | 0.136        | 0.255        | 0.121        | 0.161        | 0.125        | 0.123        | 0.135        | 0.137        | 0.135        | <b>0.139</b> |
| M06       | <b>0.065</b> | <b>0.065</b> | 0.141        | 0.141        | <b>0.064</b> | <b>0.072</b> | <b>0.072</b> | <b>0.070</b> | <b>0.072</b> | <b>0.072</b> | <b>0.070</b> | <b>0.074</b> | <b>0.074</b> | <b>0.054</b> | <b>0.051</b> | <b>0.068</b> | 0.165        | 0.170        | 0.140        | 0.152        | <b>0.093</b> |
| M06L      | 0.121        | 0.120        | 0.140        | 0.140        | 0.145        | 0.127        | 0.100        | <b>0.074</b> | 0.127        | <b>0.099</b> | <b>0.073</b> | 0.127        | 0.113        | <b>0.082</b> | 0.111        | <b>0.066</b> | 0.134        | <b>0.099</b> | 0.110        | <b>0.076</b> | <b>0.109</b> |
| M06HF     | 0.137        | 0.138        | 0.142        | 0.142        | 0.167        | 0.144        | 0.144        | 0.147        | 0.144        | 0.144        | 0.147        | 0.144        | <b>0.055</b> | 0.112        | 0.146        | 0.143        | 0.143        | 0.145        | 0.141        | 0.112        | <b>0.137</b> |
| M062X     | 0.127        | 0.128        | 0.146        | 0.146        | 0.245        | 0.144        | 0.134        | 0.139        | 0.144        | 0.134        | 0.139        | 0.146        | 0.256        | <b>0.042</b> | 0.170        | 0.126        | 0.155        | 0.145        | 0.145        | 0.171        | <b>0.149</b> |
| M05       | 0.220        | 0.222        | 0.197        | 0.197        | 0.307        | 0.224        | 0.224        | 0.222        | 0.225        | 0.224        | 0.223        | 0.224        | 0.387        | 0.247        | 0.257        | 0.195        | 0.208        | 0.193        | 0.197        | 0.190        | <b>0.229</b> |
| M0        |              |              |              |              |              |              |              |              |              |              |              |              |              |              |              |              |              |              |              |              |              |

|            |       |       |       |       |       |       |       |       |       |       |       |       |       |       |       |       |       |       |       |       |       |
|------------|-------|-------|-------|-------|-------|-------|-------|-------|-------|-------|-------|-------|-------|-------|-------|-------|-------|-------|-------|-------|-------|
| PW6B95     | 0.108 | 0.108 | 0.106 | 0.106 | 0.195 | 0.100 | 0.099 | 0.086 | 0.100 | 0.099 | 0.086 | 0.120 | 0.177 | 0.112 | 0.108 | 0.101 | 0.093 | 0.106 | 0.107 | 0.107 | 0.111 |
| PW6B95D3   | 0.081 | 0.081 | 0.089 | 0.089 | 0.180 | 0.082 | 0.082 | 0.069 | 0.082 | 0.082 | 0.069 | 0.081 | 0.182 | 0.097 | 0.092 | 0.084 | 0.075 | 0.088 | 0.089 | 0.090 | 0.093 |
| M08HX      | 0.116 | 0.136 | 0.129 | 0.129 | 0.229 | 0.144 | 0.150 | 0.150 | 0.145 | 0.151 | 0.151 | 0.137 | 0.332 | 0.224 | 0.172 | 0.152 | 0.092 | 0.122 | 0.133 | 0.164 | 0.158 |
| M11        | 0.116 | 0.115 | 0.159 | 0.159 | 0.210 | 0.135 | 0.132 | 0.127 | 0.134 | 0.131 | 0.127 | 0.136 | 0.238 | 0.098 | 0.149 | 0.102 | 0.147 | 0.151 | 0.158 | 0.163 | 0.144 |
| M11L       | 0.766 | 0.798 | 1.000 | 1.000 | 0.661 | 0.837 | 0.820 | 0.636 | 0.836 | 0.821 | 0.636 | 0.836 | 0.511 | 0.685 | 0.650 | 0.866 | 0.902 | 1.053 | 0.984 | 1.082 | 0.819 |
| SOGGA11    | 0.385 | 0.385 | 0.341 | 0.341 | 0.376 | 0.335 | 0.338 | 0.343 | 0.336 | 0.339 | 0.343 | 0.333 | 0.733 | 0.339 | 0.357 | 0.343 | 0.356 | 0.374 | 0.328 | 0.348 | 0.369 |
| SOGGA11X   | 0.879 | 0.868 | 1.053 | 1.052 | 0.738 | 0.938 | 0.911 | 0.909 | 0.929 | 0.911 | 0.909 | 0.953 | 0.357 | 0.763 | 0.786 | 1.024 | 0.927 | 1.018 | 1.029 | 1.051 | 0.900 |
| N12        | 0.945 | 0.910 | 1.556 | 1.563 | 0.793 | 1.297 | 1.285 | 1.233 | 1.344 | 1.320 | 1.206 | 1.357 | 0.632 | 1.288 | 0.811 | 1.474 | 1.072 | 1.596 | 1.487 | 1.614 | 1.239 |
| N12SX      | 0.629 | 0.632 | 1.548 | 1.563 | 0.932 | 1.282 | 0.962 | 0.949 | 1.287 | 0.971 | 0.994 | 1.288 | 0.350 | 0.829 | 0.817 | 1.230 | 0.998 | 1.621 | 1.574 | 1.733 | 1.109 |
| MN12SX     | 0.288 | 0.288 | 0.798 | 0.798 | 0.278 | 0.456 | 0.420 | 0.374 | 0.457 | 0.419 | 0.354 | 0.460 | 0.159 | 0.367 | 0.218 | 0.337 | 0.617 | 0.915 | 0.764 | 0.893 | 0.483 |
| MN12L      | 0.792 | 0.731 | 1.051 | 1.051 | 0.617 | 0.844 | 0.815 | 0.769 | 0.845 | 0.815 | 0.769 | 0.813 | 0.156 | 0.501 | 0.609 | 0.816 | 0.874 | 1.157 | 0.955 | 1.259 | 0.812 |
| MN15       | 0.094 | 0.093 | 0.081 | 0.081 | 0.130 | 0.075 | 0.078 | 0.066 | 0.075 | 0.078 | 0.066 | 0.080 | 0.197 | 0.097 | 0.129 | 0.066 | 0.080 | 0.072 | 0.082 | 0.088 | 0.090 |
| MN15L      | 0.072 | 0.063 | 0.086 | 0.086 | 0.111 | 0.076 | 0.076 | 0.070 | 0.076 | 0.076 | 0.062 | 0.087 | 0.122 | 0.107 | 0.110 | 0.061 | 0.079 | 0.081 | 0.086 | 0.089 | 0.084 |
| LC-HFS     | 0.468 | 0.457 | 1.062 | 1.062 | 0.453 | 1.002 | 0.941 | 0.861 | 1.001 | 0.940 | 0.852 | 1.008 | 0.285 | 0.910 | 0.454 | 1.058 | 0.722 | 1.184 | 1.080 | 1.200 | 0.850 |
| LC-HFB     | 0.470 | 0.458 | 1.073 | 1.073 | 0.453 | 1.017 | 0.946 | 0.850 | 1.016 | 0.940 | 0.860 | 0.987 | 0.286 | 0.952 | 0.456 | 1.125 | 0.725 | 1.161 | 1.070 | 1.281 | 0.860 |
| LC-XAlpha  | 0.472 | 0.460 | 1.047 | 1.047 | 0.442 | 0.981 | 0.923 | 0.814 | 1.004 | 0.929 | 0.813 | 0.945 | 0.284 | 0.916 | 0.457 | 1.094 | 0.714 | 1.093 | 1.048 | 1.200 | 0.834 |
| LC-M06L    | 0.722 | 0.723 | 0.712 | 0.712 | 0.734 | 0.712 | 0.722 | 0.723 | 0.713 | 0.723 | 0.724 | 0.703 | 0.688 | 0.712 | 0.721 | 0.718 | 0.718 | 0.719 | 0.716 | 0.718 | 0.717 |
| LC-M11L    | 0.766 | 0.798 | 1.000 | 1.001 | 0.661 | 0.837 | 0.820 | 0.636 | 0.836 | 0.821 | 0.636 | 0.836 | 0.511 | 0.685 | 0.650 | 0.866 | 0.902 | 1.053 | 0.984 | 1.084 | 0.819 |
| LC-N12     | 1.735 | 1.735 | 2.143 | 2.145 | 1.811 | 1.828 | 1.812 | 1.787 | 1.829 | 1.806 | 1.785 | 1.829 | 1.343 | 1.779 | 1.827 | 1.792 | 2.001 | 2.170 | 2.071 | 2.139 | 1.868 |
| LC-B97D    | 0.658 | 0.658 | 0.651 | 0.651 | 0.672 | 0.648 | 0.652 | 0.651 | 0.648 | 0.653 | 0.652 | 0.641 | 0.705 | 0.648 | 0.659 | 0.651 | 0.653 | 0.651 | 0.651 | 0.651 | 0.655 |
| LC-B97D3   | 0.705 | 0.706 | 0.698 | 0.698 | 0.717 | 0.693 | 0.698 | 0.698 | 0.694 | 0.699 | 0.699 | 0.685 | 0.750 | 0.695 | 0.705 | 0.698 | 0.700 | 0.699 | 0.699 | 0.698 | 0.702 |
| LC-wPBE    | 0.248 | 0.244 | 0.631 | 0.629 | 0.309 | 0.581 | 0.524 | 0.510 | 0.581 | 0.519 | 0.510 | 0.572 | 0.215 | 0.531 | 0.266 | 0.537 | 0.406 | 0.679 | 0.639 | 0.723 | 0.493 |
| LC-wHPBE   | 0.244 | 0.243 | 0.671 | 0.669 | 0.309 | 0.576 | 0.521 | 0.461 | 0.576 | 0.521 | 0.463 | 0.553 | 0.216 | 0.559 | 0.263 | 0.555 | 0.405 | 0.675 | 0.631 | 0.718 | 0.492 |
| CAM-B3LYP  | 0.214 | 0.216 | 0.170 | 0.170 | 0.316 | 0.201 | 0.192 | 0.196 | 0.201 | 0.192 | 0.196 | 0.205 | 0.363 | 0.169 | 0.264 | 0.170 | 0.209 | 0.171 | 0.178 | 0.170 | 0.208 |
| LC-HCTH    | 0.558 | 0.558 | 0.541 | 0.541 | 0.579 | 0.538 | 0.541 | 0.540 | 0.538 | 0.542 | 0.541 | 0.532 | 0.623 | 0.534 | 0.559 | 0.537 | 0.546 | 0.540 | 0.540 | 0.539 | 0.548 |
| LC-tHCTH   | 0.736 | 0.737 | 0.730 | 0.730 | 0.745 | 0.723 | 0.728 | 0.728 | 0.724 | 0.729 | 0.729 | 0.716 | 0.777 | 0.726 | 0.735 | 0.729 | 0.731 | 0.730 | 0.730 | 0.729 | 0.732 |
| LC-XaVP86  | 0.180 | 0.182 | 0.478 | 0.479 | 0.244 | 0.207 | 0.164 | 0.213 | 0.206 | 0.165 | 0.218 | 0.199 | 0.372 | 0.328 | 0.303 | 0.220 | 0.387 | 0.398 | 0.476 | 0.530 | 0.297 |
| LC-XaVWN   | 0.163 | 0.173 | 0.380 | 0.381 | 0.256 | 0.338 | 0.278 | 0.251 | 0.337 | 0.277 | 0.251 | 0.340 | 0.274 | 0.346 | 0.234 | 0.311 | 0.262 | 0.389 | 0.380 | 0.404 | 0.301 |
| LC-XaVWN5  | 0.206 | 0.208 | 0.496 | 0.496 | 0.290 | 0.468 | 0.384 | 0.340 | 0.466 | 0.384 | 0.336 | 0.467 | 0.272 | 0.447 | 0.265 | 0.443 | 0.334 | 0.519 | 0.501 | 0.536 | 0.393 |
| BB95       | 0.551 | 0.724 | 0.636 | 0.636 | 0.499 | 0.693 | 1.040 | 0.634 | 0.705 | 0.598 | 0.650 | 0.593 | 0.335 | 0.464 | 0.658 | 1.383 | 0.839 | 0.874 | 0.657 | 0.646 | 0.691 |
| BBRC       | 1.819 | 1.815 | 2.206 | 2.206 | 1.368 | 1.949 | 1.951 | 1.964 | 1.950 | 1.952 | 1.954 | 1.976 | 1.460 | 2.034 | 1.833 | 2.234 | 1.885 | 2.232 | 2.216 | 2.336 | 1.967 |
| BRKCIS     | 1.829 | 1.827 | 2.208 | 2.208 | 1.399 | 1.905 | 1.903 | 1.897 | 1.908 | 1.901 | 1.896 | 1.944 | 1.397 | 1.964 | 1.814 | 2.204 | 1.917 | 2.232 | 2.205 | 2.288 | 1.942 |
| BLYP       | 1.667 | 1.673 | 2.216 | 2.221 | 1.231 | 1.885 | 1.859 | 1.779 | 1.835 | 1.863 | 1.816 | 1.895 | 1.120 | 1.701 | 1.136 | 2.140 | 1.380 | 2.222 | 2.216 | 2.320 | 1.809 |
| BP86       | 1.891 | 1.891 | 2.219 | 2.219 | 1.692 | 1.977 | 2.007 | 2.001 | 1.999 | 2.007 | 2.005 | 1.978 | 1.425 | 2.099 | 1.891 | 2.164 | 1.936 | 2.248 | 2.227 | 2.390 | 2.013 |
| BPBE       | 1.801 | 1.822 | 2.169 | 2.164 | 1.398 | 1.906 | 1.873 | 1.822 | 1.875 | 1.872 | 1.867 | 1.938 | 1.519 | 1.962 | 1.845 | 2.143 | 1.869 | 2.232 | 2.165 | 2.341 | 1.929 |
| BPKZB      | 1.810 | 1.809 | 2.136 | 2.135 | 1.408 | 1.929 | 1.794 | 1.784 | 1.916 | 1.867 | 1.750 | 1.916 | 1.463 | 1.979 | 1.798 | 2.111 | 1.877 | 2.230 | 2.123 | 2.333 | 1.908 |
| BPL        | 1.818 | 1.811 | 2.125 | 2.121 | 1.365 | 1.902 | 1.896 | 1.826 | 1.905 | 1.860 | 1.786 | 1.934 | 1.423 | 1.802 | 1.757 | 2.105 | 1.866 | 2.227 | 2.114 | 2.205 | 1.892 |
| BPW91      | 1.822 | 1.821 | 2.149 | 2.139 | 1.467 | 1.946 | 1.867 | 1.774 | 1.943 | 1.871 | 1.759 | 1.946 | 1.461 | 1.985 | 1.794 | 2.112 | 1.920 | 2.223 | 2.109 | 2.301 | 1.921 |
| BRxRevTPSS | 1.815 | 1.794 | 2.190 | 2.201 | 1.442 | 1.918 | 1.883 | 1.801 | 1.924 | 1.915 | 1.768 | 1.918 | 1.490 | 2.002 | 1.770 | 2.133 | 1.888 | 2.239 | 2.238 | 2.256 | 1.929 |
| BTPSS      | 1.814 | 1.831 | 2.170 | 2.166 | 1.455 | 1.915 | 1.942 | 1.754 | 1.916 | 1.914 | 1.863 | 1.915 | 1.428 | 1.937 | 1.803 | 2.165 | 1.875 | 2.224 | 2.141 | 2.333 | 1.928 |
| BVP86      | 1.882 | 1.883 | 2.217 | 2.220 | 1.684 | 1.997 | 2.007 | 1.995 | 1.975 | 2.011 | 1.971 | 1.997 | 1.431 | 2.110 | 1.910 | 2.165 | 1.982 | 2.287 | 2.222 | 2.389 | 2.017 |
| BVWN       | 1.856 | 1.859 | 2.106 | 2.117 | 1.269 | 1.758 | 1.710 | 1.658 | 1.757 | 1.710 | 1.663 | 1.765 | 1.481 | 1.704 | 1.764 | 1.971 | 1.831 | 2.179 | 1.986 | 2.304 | 1.822 |
| BVWN5      | 1.814 | 1.813 | 2.116 | 2.115 | 1.362 | 1.896 | 1.861 | 1.814 | 1.937 | 1.897 | 1.786 | 1.939 | 1.468 | 1.794 | 1.770 | 2.112 | 1.867 | 2.221 | 2.111 | 2.211 | 1.895 |
| BRxB95     | 0.146 | 0.146 | 0.174 | 0.174 | 0.120 | 0.203 | 0.146 | 0.144 | 0.203 | 0.146 | 0.144 | 0.205 | 0.110 | 0.176 | 0.143 | 0.178 | 0.146 | 0.150 | 0.174 | 0.150 | 0.159 |
| BRxBRC     | 1.242 | 1.172 | 1.721 | 1.717 | 0.939 | 1.376 | 1.370 | 1.319 | 1.373 | 1.364 | 1.291 | 1.415 | 0.873 | 1.305 | 1.034 | 1.691 | 1.194 | 1.737 | 1.661 | 1.890 | 1.384 |
| BRxKCIS    | 1.233 | 1.231 | 1.603 | 1.603 | 0.939 | 1.382 | 1.346 | 1.204 | 1.383 | 1.328 | 1.192 | 1.386 | 0.850 | 1.245 | 0.984 | 1.664 | 1.194 | 1.745 | 1.588 | 1.745 | 1.342 |
| BRxLYP     | 0.223 | 0.228 | 0.170 | 0.170 | 0.325 | 0.190 | 0.153 | 0.162 | 0.182 | 0.153 | 0.162 | 0.220 | 0.359 | 0.228 | 0.268 | 0.176 | 0.214 | 0.173 | 0.175 | 0.167 | 0.205 |
| BRxP86     | 1.473 | 1.439 | 2.093 | 2.097 | 1.138 | 1.630 | 1.437 | 1.366 | 1.631 | 1.437 | 1.393 | 1.704 | 1.034 | 1.587 | 0.998 | 1.770 | 1.684 | 2.079 | 2.045 | 2.133 | 1.608 |
| BRxPBE     | 1.531 | 1.522 | 1.753 | 1.754 | 0.946 | 1.484 | 1.403 | 1.387 | 1.435 | 1.372 | 1.436 | 1.443 | 0.931 | 1.416 | 1.125 | 1.796 | 1.433 | 1.891 | 1.822 | 1.964 | 1.492 |
| BRxPKZB    | 1.392 | 1.445 | 1.792 | 1.792 | 0.990 | 1.466 | 1.365 | 1.380 | 1.438 | 1.454 | 1.406 | 1.487 | 0.888 | 1.419 | 1.152 | 1.698 | 1.476 | 1.930 | 1.849 | 1.935 | 1.488 |
| BRxPL      | 1.287 | 1.248 | 1.615 | 1.615 | 0.922 | 1.353 | 1.360 | 1.241 | 1.352 | 1.362 | 1.246 | 1.372 | 0.832 | 1.213 | 1.121 | 1.612 | 1.260 | 1.707 | 1.607 | 1.733 | 1.353 |
| BRxPW91    | 1.476 | 1.442 | 1.820 | 1.820 | 0.987 | 1.513 | 1.414 | 1.364 | 1.479 | 1.402 | 1.374 | 1.529 | 0.883 | 1.443 | 1.246 | 1.652 | 1.412 | 1.799 | 1.786 | 1.988 | 1.492 |
| BRxRevTPSS | 1.386 | 1.371 | 1.935 | 1.899 | 0.993 | 1.480 | 1.476 | 1.395 | 1.447 | 1.496 | 1.392 | 1.485 | 0.866 | 1.377 | 1.160 | 1.658 | 1.335 | 1.882 | 1.741 | 1.920 | 1.485 |
| BRxTPSS    | 1.446 | 1.445 | 1.830 | 1.829 | 1.035 | 1.472 | 1.454 | 1.409 | 1.469 | 1.408 | 1.409 | 1.468 | 0.883 | 1.406 | 1.165 | 1.734 | 1.468 | 1.886 | 1.823 | 1.940 | 1.499 |
| BRxVP86    | 1.470 | 1.470 | 2.048 | 2.095 | 1.246 | 1.625 | 1.414 | 1.398 | 1.656 | 1.450 | 1.379 | 1.656 | 0.997 | 1.619 | 0.973 | 1.737 | 1.692 | 2.048 | 2.100 | 2.134 | 1.610 |
| BRxVWN     | 1.198 | 1.186 | 1.549 |       |       |       |       |       |       |       |       |       |       |       |       |       |       |       |       |       |       |

|             |       |       |       |       |       |       |       |       |       |       |       |       |       |       |       |       |       |       |       |       |       |
|-------------|-------|-------|-------|-------|-------|-------|-------|-------|-------|-------|-------|-------|-------|-------|-------|-------|-------|-------|-------|-------|-------|
| G96B95      | 2.807 | 2.845 | 3.724 | 3.666 | 2.943 | 3.587 | 3.567 | 3.850 | 3.514 | 3.279 | 3.543 | 3.589 | 2.391 | 4.074 | 2.856 | 3.707 | 3.135 | 3.783 | 3.731 | 3.889 | 3.424 |
| G96BRC      | 2.822 | 2.825 | 3.376 | 3.383 | 2.587 | 3.230 | 3.340 | 3.334 | 3.332 | 3.334 | 3.329 | 3.282 | 2.176 | 3.658 | 2.687 | 3.416 | 3.035 | 3.635 | 3.267 | 3.588 | 3.182 |
| G96KCIS     | 2.831 | 2.838 | 3.369 | 3.369 | 2.797 | 3.349 | 3.244 | 3.241 | 3.349 | 3.244 | 3.240 | 3.341 | 2.165 | 3.684 | 2.802 | 3.382 | 3.022 | 3.511 | 3.353 | 3.509 | 3.182 |
| G96LYP      | 2.812 | 2.812 | 3.437 | 3.443 | 2.660 | 3.376 | 3.376 | 3.319 | 3.376 | 3.369 | 3.318 | 3.369 | 2.158 | 3.988 | 2.702 | 3.428 | 3.040 | 3.527 | 3.426 | 3.487 | 3.221 |
| G96P86      | 2.764 | 2.766 | 3.348 | 3.357 | 2.681 | 3.046 | 3.048 | 3.045 | 3.060 | 3.054 | 3.022 | 3.053 | 2.176 | 3.606 | 2.639 | 3.215 | 3.017 | 3.394 | 3.251 | 3.397 | 3.047 |
| G96PBE      | 2.766 | 2.769 | 3.369 | 3.362 | 2.579 | 3.117 | 3.115 | 3.118 | 3.116 | 3.119 | 3.120 | 3.114 | 2.148 | 3.456 | 2.688 | 3.372 | 3.020 | 3.394 | 3.249 | 3.450 | 3.072 |
| G96PKZB     | 2.770 | 2.770 | 3.367 | 3.363 | 2.575 | 3.110 | 3.112 | 3.119 | 3.118 | 3.112 | 3.116 | 3.112 | 2.147 | 3.517 | 2.684 | 3.372 | 3.026 | 3.390 | 3.289 | 3.388 | 3.073 |
| G96PL       | 2.766 | 2.765 | 3.362 | 3.359 | 2.628 | 3.111 | 3.101 | 3.083 | 3.112 | 3.102 | 3.086 | 3.108 | 2.147 | 3.568 | 2.689 | 3.381 | 2.998 | 3.421 | 3.257 | 3.386 | 3.071 |
| G96PW91     | 2.768 | 2.766 | 3.364 | 3.366 | 2.537 | 3.115 | 3.115 | 3.112 | 3.114 | 3.110 | 3.113 | 3.109 | 2.151 | 3.464 | 2.682 | 3.369 | 3.045 | 3.385 | 3.247 | 3.401 | 3.067 |
| G96RevTPSS  | 2.771 | 2.770 | 3.372 | 3.364 | 2.624 | 3.118 | 3.107 | 3.123 | 3.118 | 3.111 | 3.123 | 3.118 | 2.149 | 3.529 | 2.687 | 3.388 | 3.019 | 3.382 | 3.246 | 3.401 | 3.076 |
| G96TPSS     | 2.767 | 2.770 | 3.371 | 3.368 | 2.580 | 3.105 | 3.113 | 3.120 | 3.115 | 3.111 | 3.120 | 3.113 | 2.151 | 3.473 | 2.685 | 3.369 | 3.022 | 3.389 | 3.249 | 3.390 | 3.069 |
| G96VP86     | 2.777 | 2.778 | 3.353 | 3.355 | 2.690 | 3.064 | 3.056 | 3.039 | 3.059 | 3.052 | 3.045 | 3.053 | 2.178 | 3.552 | 2.636 | 3.218 | 3.019 | 3.383 | 3.243 | 3.450 | 3.050 |
| G96VWN      | 2.794 | 2.791 | 3.255 | 3.259 | 2.597 | 3.069 | 3.077 | 3.076 | 3.070 | 3.072 | 3.091 | 3.071 | 2.149 | 3.405 | 2.679 | 3.222 | 2.981 | 3.308 | 3.248 | 3.384 | 3.030 |
| G96VWN5     | 2.765 | 2.764 | 3.360 | 3.352 | 2.624 | 3.113 | 3.092 | 3.082 | 3.083 | 3.092 | 3.084 | 3.111 | 2.144 | 3.549 | 2.689 | 3.379 | 2.992 | 3.409 | 3.260 | 3.388 | 3.067 |
| LGB95       | 0.107 | 0.101 | 0.093 | 0.093 | 0.187 | 0.081 | 0.065 | 0.067 | 0.081 | 0.065 | 0.067 | 0.080 | 0.266 | 0.098 | 0.150 | 0.055 | 0.100 | 0.091 | 0.093 | 0.095 | 0.102 |
| LGBRC       | 0.146 | 0.154 | 0.135 | 0.134 | 0.274 | 0.157 | 0.145 | 0.125 | 0.155 | 0.133 | 0.116 | 0.171 | 0.305 | 0.136 | 0.201 | 0.137 | 0.148 | 0.140 | 0.133 | 0.142 | 0.159 |
| LGKCIS      | 0.135 | 0.142 | 0.070 | 0.071 | 0.242 | 0.088 | 0.082 | 0.074 | 0.088 | 0.080 | 0.073 | 0.105 | 0.295 | 0.075 | 0.180 | 0.078 | 0.116 | 0.072 | 0.076 | 0.070 | 0.111 |
| LGLYP       | 0.326 | 0.328 | 0.293 | 0.293 | 0.378 | 0.284 | 0.295 | 0.298 | 0.285 | 0.296 | 0.299 | 0.284 | 0.459 | 0.289 | 0.348 | 0.289 | 0.309 | 0.295 | 0.294 | 0.294 | 0.312 |
| LGP86       | 0.220 | 0.225 | 0.130 | 0.130 | 0.277 | 0.094 | 0.171 | 0.187 | 0.111 | 0.174 | 0.189 | 0.090 | 0.330 | 0.101 | 0.250 | 0.160 | 0.172 | 0.152 | 0.144 | 0.141 | 0.172 |
| LGPBE       | 0.090 | 0.109 | 0.181 | 0.181 | 0.240 | 0.209 | 0.140 | 0.132 | 0.207 | 0.138 | 0.133 | 0.227 | 0.253 | 0.227 | 0.174 | 0.172 | 0.131 | 0.177 | 0.176 | 0.177 | 0.174 |
| LGPKZB      | 0.090 | 0.111 | 0.189 | 0.189 | 0.243 | 0.217 | 0.148 | 0.140 | 0.216 | 0.147 | 0.142 | 0.234 | 0.251 | 0.233 | 0.180 | 0.187 | 0.138 | 0.200 | 0.179 | 0.187 | 0.181 |
| LGPL        | 0.166 | 0.173 | 0.232 | 0.232 | 0.252 | 0.256 | 0.218 | 0.185 | 0.255 | 0.217 | 0.185 | 0.264 | 0.278 | 0.268 | 0.202 | 0.266 | 0.192 | 0.246 | 0.228 | 0.229 | 0.227 |
| LGPW91      | 0.098 | 0.110 | 0.146 | 0.146 | 0.233 | 0.169 | 0.128 | 0.100 | 0.168 | 0.127 | 0.101 | 0.192 | 0.259 | 0.180 | 0.161 | 0.134 | 0.124 | 0.146 | 0.139 | 0.140 | 0.150 |
| LGRRevTPSS  | 0.105 | 0.116 | 0.120 | 0.120 | 0.231 | 0.145 | 0.098 | 0.068 | 0.141 | 0.092 | 0.067 | 0.161 | 0.267 | 0.150 | 0.165 | 0.093 | 0.114 | 0.114 | 0.115 | 0.118 | 0.130 |
| LGTPSS      | 0.091 | 0.111 | 0.187 | 0.187 | 0.241 | 0.219 | 0.146 | 0.138 | 0.214 | 0.146 | 0.143 | 0.236 | 0.255 | 0.232 | 0.178 | 0.185 | 0.136 | 0.187 | 0.175 | 0.184 | 0.179 |
| LGVP86      | 0.217 | 0.223 | 0.129 | 0.128 | 0.276 | 0.100 | 0.161 | 0.176 | 0.109 | 0.169 | 0.186 | 0.096 | 0.329 | 0.099 | 0.238 | 0.157 | 0.170 | 0.145 | 0.137 | 0.138 | 0.169 |
| LGWVN       | 0.156 | 0.169 | 0.189 | 0.189 | 0.259 | 0.204 | 0.187 | 0.160 | 0.203 | 0.182 | 0.164 | 0.212 | 0.280 | 0.218 | 0.194 | 0.189 | 0.158 | 0.194 | 0.183 | 0.184 | 0.194 |
| LGWVN5      | 0.167 | 0.173 | 0.234 | 0.234 | 0.254 | 0.257 | 0.218 | 0.188 | 0.256 | 0.218 | 0.186 | 0.267 | 0.284 | 0.271 | 0.204 | 0.263 | 0.194 | 0.247 | 0.247 | 0.232 | 0.230 |
| mPWB95      | 0.128 | 0.127 | 0.166 | 0.166 | 0.174 | 0.152 | 0.151 | 0.150 | 0.152 | 0.150 | 0.150 | 0.153 | 0.172 | 0.168 | 0.137 | 0.160 | 0.162 | 0.167 | 0.166 | 0.168 | 0.156 |
| mPWBRC      | 0.285 | 0.287 | 0.458 | 0.458 | 0.336 | 0.452 | 0.414 | 0.397 | 0.451 | 0.413 | 0.396 | 0.452 | 0.281 | 0.416 | 0.269 | 0.485 | 0.341 | 0.498 | 0.457 | 0.495 | 0.402 |
| mPWKCIS     | 0.258 | 0.262 | 0.410 | 0.410 | 0.308 | 0.398 | 0.370 | 0.350 | 0.397 | 0.370 | 0.347 | 0.402 | 0.270 | 0.383 | 0.238 | 0.436 | 0.300 | 0.438 | 0.404 | 0.433 | 0.359 |
| mPWLYP      | 0.248 | 0.251 | 0.208 | 0.209 | 0.352 | 0.219 | 0.225 | 0.227 | 0.219 | 0.225 | 0.227 | 0.225 | 0.380 | 0.213 | 0.297 | 0.208 | 0.245 | 0.205 | 0.213 | 0.208 | 0.240 |
| mPWP86      | 0.178 | 0.184 | 0.424 | 0.424 | 0.276 | 0.392 | 0.300 | 0.272 | 0.392 | 0.298 | 0.271 | 0.421 | 0.232 | 0.365 | 0.224 | 0.397 | 0.269 | 0.441 | 0.410 | 0.440 | 0.331 |
| mPWPBE      | 0.360 | 0.354 | 0.517 | 0.517 | 0.353 | 0.538 | 0.495 | 0.470 | 0.537 | 0.495 | 0.467 | 0.538 | 0.291 | 0.476 | 0.321 | 0.570 | 0.401 | 0.551 | 0.516 | 0.540 | 0.465 |
| mPWPKZB     | 0.363 | 0.359 | 0.520 | 0.520 | 0.354 | 0.537 | 0.498 | 0.470 | 0.536 | 0.501 | 0.471 | 0.537 | 0.292 | 0.479 | 0.324 | 0.569 | 0.406 | 0.554 | 0.521 | 0.543 | 0.468 |
| mPWPL       | 0.362 | 0.357 | 0.484 | 0.484 | 0.342 | 0.502 | 0.464 | 0.437 | 0.502 | 0.462 | 0.434 | 0.504 | 0.275 | 0.443 | 0.319 | 0.543 | 0.380 | 0.518 | 0.486 | 0.508 | 0.440 |
| mPWPW91     | 0.351 | 0.349 | 0.511 | 0.511 | 0.352 | 0.521 | 0.485 | 0.455 | 0.523 | 0.483 | 0.454 | 0.527 | 0.291 | 0.470 | 0.315 | 0.557 | 0.392 | 0.545 | 0.509 | 0.532 | 0.457 |
| mPWRRevTPSS | 0.328 | 0.323 | 0.491 | 0.491 | 0.345 | 0.497 | 0.452 | 0.420 | 0.496 | 0.451 | 0.420 | 0.501 | 0.280 | 0.452 | 0.299 | 0.519 | 0.375 | 0.519 | 0.489 | 0.510 | 0.433 |
| mPWTTPSS    | 0.362 | 0.357 | 0.522 | 0.522 | 0.354 | 0.539 | 0.500 | 0.473 | 0.538 | 0.500 | 0.473 | 0.540 | 0.291 | 0.481 | 0.323 | 0.574 | 0.406 | 0.554 | 0.520 | 0.543 | 0.469 |
| mPWVP86     | 0.180 | 0.185 | 0.427 | 0.427 | 0.277 | 0.398 | 0.303 | 0.275 | 0.393 | 0.301 | 0.274 | 0.426 | 0.230 | 0.369 | 0.229 | 0.399 | 0.272 | 0.449 | 0.415 | 0.448 | 0.334 |
| mPWVWN      | 0.335 | 0.332 | 0.440 | 0.440 | 0.332 | 0.431 | 0.406 | 0.392 | 0.428 | 0.407 | 0.391 | 0.432 | 0.264 | 0.409 | 0.305 | 0.476 | 0.355 | 0.474 | 0.439 | 0.454 | 0.397 |
| mPWVWN5     | 0.363 | 0.358 | 0.486 | 0.486 | 0.342 | 0.503 | 0.465 | 0.439 | 0.502 | 0.463 | 0.437 | 0.504 | 0.274 | 0.444 | 0.320 | 0.545 | 0.381 | 0.520 | 0.489 | 0.509 | 0.442 |
| OB95        | 0.310 | 0.310 | 0.407 | 0.407 | 0.266 | 0.415 | 0.415 | 0.370 | 0.415 | 0.415 | 0.370 | 0.452 | 0.225 | 0.379 | 0.303 | 0.432 | 0.368 | 0.400 | 0.394 | 0.339 | 0.370 |
| OBRC        | 0.478 | 0.474 | 0.711 | 0.711 | 0.389 | 0.709 | 0.695 | 0.672 | 0.708 | 0.695 | 0.673 | 0.709 | 0.294 | 0.633 | 0.407 | 0.765 | 0.566 | 0.781 | 0.706 | 0.752 | 0.626 |
| OKCIS       | 0.471 | 0.466 | 0.686 | 0.686 | 0.378 | 0.688 | 0.667 | 0.647 | 0.687 | 0.666 | 0.647 | 0.692 | 0.285 | 0.609 | 0.408 | 0.725 | 0.547 | 0.717 | 0.682 | 0.724 | 0.604 |
| OLYP        | 0.308 | 0.310 | 0.456 | 0.456 | 0.343 | 0.445 | 0.431 | 0.415 | 0.445 | 0.430 | 0.415 | 0.446 | 0.321 | 0.387 | 0.305 | 0.509 | 0.366 | 0.492 | 0.465 | 0.472 | 0.411 |
| OP86        | 0.559 | 0.553 | 0.877 | 0.875 | 0.444 | 0.775 | 0.768 | 0.713 | 0.775 | 0.768 | 0.712 | 0.803 | 0.337 | 0.760 | 0.529 | 0.942 | 0.650 | 0.943 | 0.803 | 0.904 | 0.725 |
| OPBE        | 0.535 | 0.531 | 0.761 | 0.761 | 0.420 | 0.729 | 0.707 | 0.684 | 0.728 | 0.706 | 0.684 | 0.727 | 0.326 | 0.668 | 0.481 | 0.833 | 0.599 | 0.822 | 0.725 | 0.822 | 0.662 |
| OPKZB       | 0.538 | 0.534 | 0.764 | 0.764 | 0.422 | 0.730 | 0.709 | 0.687 | 0.730 | 0.709 | 0.687 | 0.732 | 0.326 | 0.672 | 0.484 | 0.833 | 0.603 | 0.820 | 0.728 | 0.831 | 0.665 |
| OPL         | 0.523 | 0.515 | 0.708 | 0.708 | 0.410 | 0.713 | 0.692 | 0.672 | 0.712 | 0.692 | 0.672 | 0.714 | 0.312 | 0.635 | 0.468 | 0.755 | 0.584 | 0.771 | 0.705 | 0.731 | 0.635 |
| OPW91       | 0.533 | 0.529 | 0.725 | 0.725 | 0.419 | 0.726 | 0.702 | 0.682 | 0.726 | 0.702 | 0.681 | 0.726 | 0.323 | 0.661 | 0.479 | 0.829 | 0.599 | 0.820 | 0.721 | 0.806 | 0.656 |
| ORRevTPSS   | 0.527 | 0.522 | 0.718 | 0.718 | 0.411 | 0.720 | 0.696 | 0.675 | 0.719 | 0.696 | 0.675 | 0.718 | 0.313 | 0.654 | 0.471 | 0.815 | 0.591 | 0.804 | 0.713 | 0.798 | 0.648 |
| OTPSS       | 0.538 | 0.534 | 0.765 | 0.765 | 0.421 | 0.732 | 0.710 | 0.688 | 0.732 | 0.710 | 0.688 | 0.734 | 0.326 | 0.673 | 0.483 | 0.835 | 0.603 | 0.825 | 0.731 | 0.826 | 0.666 |
| OVP86       | 0.560 | 0.554 | 0.878 | 0.877 | 0.462 | 0.776 | 0.768 | 0.713 | 0.776 | 0.768 | 0.713 | 0.804 | 0.337 | 0.760 | 0.530 | 0.926 | 0.649 | 0.944 | 0.804 | 0.921 | 0.726 |
| OVVN        | 0.499 | 0.493 | 0.667 | 0.667 | 0.397 | 0.661 | 0.644 | 0.622 | 0.661 | 0.641 | 0.622 | 0.661 | 0.310 | 0.599 | 0.429 | 0.707 | 0.556 | 0.702 | 0.666 | 0.693 | 0.595 |
| OVVN5       | 0.524 | 0.516 | 0.708 | 0.708 | 0.410 | 0     |       |       |       |       |       |       |       |       |       |       |       |       |       |       |       |

|             |       |       |       |       |       |       |       |       |       |       |       |       |       |       |       |       |       |       |       |       |              |
|-------------|-------|-------|-------|-------|-------|-------|-------|-------|-------|-------|-------|-------|-------|-------|-------|-------|-------|-------|-------|-------|--------------|
| PBEBRC      | 0.181 | 0.185 | 0.158 | 0.159 | 0.288 | 0.160 | 0.153 | 0.159 | 0.159 | 0.153 | 0.159 | 0.167 | 0.325 | 0.147 | 0.233 | 0.162 | 0.177 | 0.161 | 0.160 | 0.160 | <b>0.180</b> |
| PBEKCIS     | 0.180 | 0.183 | 0.128 | 0.128 | 0.273 | 0.129 | 0.129 | 0.137 | 0.127 | 0.129 | 0.137 | 0.138 | 0.321 | 0.116 | 0.224 | 0.125 | 0.167 | 0.127 | 0.130 | 0.127 | <b>0.158</b> |
| PBELYP      | 0.319 | 0.320 | 0.287 | 0.287 | 0.371 | 0.281 | 0.288 | 0.290 | 0.282 | 0.289 | 0.291 | 0.282 | 0.448 | 0.286 | 0.339 | 0.280 | 0.305 | 0.288 | 0.287 | 0.286 | <b>0.305</b> |
| PBEP86      | 0.222 | 0.225 | 0.174 | 0.174 | 0.279 | 0.166 | 0.183 | 0.191 | 0.167 | 0.184 | 0.192 | 0.170 | 0.366 | 0.166 | 0.250 | 0.178 | 0.200 | 0.180 | 0.178 | 0.176 | <b>0.201</b> |
| PBEPBE      | 0.157 | 0.161 | 0.140 | 0.139 | 0.262 | 0.137 | 0.132 | 0.124 | 0.136 | 0.131 | 0.124 | 0.147 | 0.305 | 0.126 | 0.208 | 0.140 | 0.153 | 0.145 | 0.141 | 0.141 | <b>0.158</b> |
| PBEPKZB     | 0.156 | 0.161 | 0.144 | 0.144 | 0.261 | 0.140 | 0.134 | 0.126 | 0.140 | 0.134 | 0.126 | 0.148 | 0.304 | 0.132 | 0.208 | 0.146 | 0.153 | 0.149 | 0.145 | 0.145 | <b>0.160</b> |
| PBEPL       | 0.183 | 0.187 | 0.190 | 0.190 | 0.274 | 0.182 | 0.174 | 0.168 | 0.181 | 0.174 | 0.167 | 0.189 | 0.311 | 0.185 | 0.220 | 0.201 | 0.179 | 0.199 | 0.191 | 0.191 | <b>0.197</b> |
| PBEPW91     | 0.161 | 0.166 | 0.136 | 0.136 | 0.263 | 0.136 | 0.130 | 0.131 | 0.135 | 0.130 | 0.131 | 0.146 | 0.307 | 0.125 | 0.210 | 0.134 | 0.157 | 0.139 | 0.139 | 0.137 | <b>0.157</b> |
| PBERevTPSS  | 0.163 | 0.167 | 0.135 | 0.135 | 0.261 | 0.132 | 0.129 | 0.132 | 0.132 | 0.129 | 0.132 | 0.143 | 0.307 | 0.122 | 0.209 | 0.130 | 0.158 | 0.134 | 0.136 | 0.135 | <b>0.156</b> |
| PBETPSS     | 0.156 | 0.161 | 0.143 | 0.143 | 0.261 | 0.139 | 0.133 | 0.125 | 0.138 | 0.134 | 0.125 | 0.147 | 0.305 | 0.131 | 0.208 | 0.145 | 0.153 | 0.148 | 0.144 | 0.144 | <b>0.159</b> |
| PBEVP86     | 0.221 | 0.224 | 0.172 | 0.172 | 0.278 | 0.165 | 0.181 | 0.190 | 0.166 | 0.182 | 0.191 | 0.169 | 0.365 | 0.165 | 0.249 | 0.177 | 0.199 | 0.178 | 0.177 | 0.175 | <b>0.200</b> |
| PBEVWN      | 0.174 | 0.178 | 0.180 | 0.180 | 0.275 | 0.176 | 0.167 | 0.160 | 0.176 | 0.166 | 0.160 | 0.183 | 0.313 | 0.174 | 0.223 | 0.188 | 0.172 | 0.184 | 0.182 | 0.181 | <b>0.189</b> |
| PBEVWN5     | 0.183 | 0.187 | 0.190 | 0.190 | 0.274 | 0.182 | 0.175 | 0.168 | 0.182 | 0.174 | 0.168 | 0.189 | 0.311 | 0.186 | 0.220 | 0.201 | 0.179 | 0.200 | 0.191 | 0.191 | <b>0.197</b> |
| PBEhB95     | 0.119 | 0.120 | 0.108 | 0.108 | 0.213 | 0.049 | 0.099 | 0.082 | 0.049 | 0.100 | 0.082 | 0.066 | 0.316 | 0.037 | 0.188 | 0.084 | 0.114 | 0.105 | 0.097 | 0.110 | <b>0.112</b> |
| PBEhBRC     | 0.184 | 0.187 | 0.159 | 0.159 | 0.288 | 0.162 | 0.157 | 0.163 | 0.161 | 0.157 | 0.163 | 0.170 | 0.325 | 0.153 | 0.235 | 0.164 | 0.180 | 0.162 | 0.161 | 0.161 | <b>0.183</b> |
| PBEhKCIS    | 0.178 | 0.183 | 0.131 | 0.131 | 0.272 | 0.131 | 0.133 | 0.140 | 0.130 | 0.133 | 0.142 | 0.140 | 0.321 | 0.123 | 0.224 | 0.127 | 0.171 | 0.129 | 0.133 | 0.130 | <b>0.160</b> |
| PBEhLYP     | 0.314 | 0.315 | 0.283 | 0.284 | 0.369 | 0.277 | 0.284 | 0.285 | 0.278 | 0.285 | 0.286 | 0.279 | 0.444 | 0.283 | 0.336 | 0.274 | 0.302 | 0.285 | 0.284 | 0.283 | <b>0.301</b> |
| PBEhP86     | 0.221 | 0.224 | 0.174 | 0.174 | 0.278 | 0.167 | 0.182 | 0.189 | 0.168 | 0.183 | 0.191 | 0.172 | 0.363 | 0.164 | 0.247 | 0.176 | 0.202 | 0.181 | 0.179 | 0.179 | <b>0.201</b> |
| PBEhPBE     | 0.159 | 0.163 | 0.141 | 0.141 | 0.262 | 0.141 | 0.132 | 0.129 | 0.140 | 0.132 | 0.128 | 0.150 | 0.305 | 0.133 | 0.211 | 0.142 | 0.158 | 0.144 | 0.142 | 0.142 | <b>0.160</b> |
| PBEhPKZB    | 0.159 | 0.163 | 0.145 | 0.145 | 0.263 | 0.144 | 0.134 | 0.130 | 0.144 | 0.135 | 0.130 | 0.155 | 0.304 | 0.138 | 0.211 | 0.148 | 0.158 | 0.149 | 0.147 | 0.147 | <b>0.162</b> |
| PBEhPL      | 0.184 | 0.188 | 0.190 | 0.190 | 0.277 | 0.186 | 0.177 | 0.171 | 0.185 | 0.178 | 0.171 | 0.192 | 0.312 | 0.184 | 0.222 | 0.203 | 0.181 | 0.198 | 0.190 | 0.190 | <b>0.198</b> |
| PBEhPW91    | 0.163 | 0.167 | 0.140 | 0.140 | 0.263 | 0.136 | 0.133 | 0.133 | 0.135 | 0.134 | 0.134 | 0.147 | 0.307 | 0.130 | 0.212 | 0.136 | 0.160 | 0.140 | 0.141 | 0.140 | <b>0.160</b> |
| PBEhRevTPSS | 0.165 | 0.169 | 0.135 | 0.135 | 0.261 | 0.136 | 0.132 | 0.135 | 0.135 | 0.131 | 0.135 | 0.147 | 0.307 | 0.127 | 0.212 | 0.135 | 0.161 | 0.138 | 0.138 | 0.138 | <b>0.159</b> |
| PBEhTPSS    | 0.159 | 0.163 | 0.144 | 0.144 | 0.262 | 0.142 | 0.134 | 0.129 | 0.142 | 0.133 | 0.129 | 0.153 | 0.305 | 0.136 | 0.211 | 0.147 | 0.158 | 0.148 | 0.145 | 0.145 | <b>0.161</b> |
| PBEhVP86    | 0.220 | 0.223 | 0.174 | 0.174 | 0.278 | 0.167 | 0.181 | 0.188 | 0.167 | 0.182 | 0.189 | 0.171 | 0.361 | 0.163 | 0.245 | 0.175 | 0.201 | 0.180 | 0.179 | 0.177 | <b>0.200</b> |
| PBEhVWN     | 0.177 | 0.180 | 0.182 | 0.182 | 0.277 | 0.181 | 0.169 | 0.165 | 0.181 | 0.169 | 0.164 | 0.186 | 0.314 | 0.178 | 0.225 | 0.190 | 0.174 | 0.185 | 0.183 | 0.182 | <b>0.192</b> |
| PBEhVWN5    | 0.184 | 0.188 | 0.190 | 0.190 | 0.276 | 0.186 | 0.178 | 0.171 | 0.186 | 0.178 | 0.172 | 0.192 | 0.312 | 0.185 | 0.222 | 0.203 | 0.182 | 0.199 | 0.190 | 0.191 | <b>0.199</b> |
| PKZBB95     | 0.166 | 0.166 | 0.196 | 0.196 | 0.227 | 0.164 | 0.163 | 0.162 | 0.164 | 0.163 | 0.162 | 0.134 | 0.234 | 0.150 | 0.190 | 0.185 | 0.193 | 0.195 | 0.195 | 0.197 | <b>0.180</b> |
| PKZBBRC     | 0.206 | 0.207 | 0.250 | 0.250 | 0.271 | 0.239 | 0.232 | 0.226 | 0.238 | 0.231 | 0.226 | 0.243 | 0.306 | 0.223 | 0.210 | 0.255 | 0.218 | 0.256 | 0.254 | 0.257 | <b>0.240</b> |
| PKZBKIS     | 0.195 | 0.198 | 0.218 | 0.218 | 0.262 | 0.207 | 0.203 | 0.194 | 0.207 | 0.202 | 0.195 | 0.214 | 0.299 | 0.200 | 0.203 | 0.225 | 0.197 | 0.223 | 0.221 | 0.222 | <b>0.215</b> |
| PKZBLYP     | 0.244 | 0.244 | 0.212 | 0.212 | 0.339 | 0.229 | 0.232 | 0.232 | 0.229 | 0.232 | 0.233 | 0.230 | 0.369 | 0.230 | 0.288 | 0.212 | 0.240 | 0.210 | 0.214 | 0.212 | <b>0.242</b> |
| PKZBP86     | 0.176 | 0.178 | 0.178 | 0.179 | 0.267 | 0.176 | 0.171 | 0.164 | 0.176 | 0.171 | 0.164 | 0.180 | 0.296 | 0.169 | 0.213 | 0.179 | 0.167 | 0.180 | 0.179 | 0.183 | <b>0.187</b> |
| PKZBPBE     | 0.205 | 0.207 | 0.255 | 0.255 | 0.260 | 0.241 | 0.232 | 0.220 | 0.240 | 0.232 | 0.220 | 0.246 | 0.286 | 0.237 | 0.202 | 0.266 | 0.217 | 0.261 | 0.258 | 0.261 | <b>0.240</b> |
| PKZBPKZB    | 0.205 | 0.208 | 0.260 | 0.260 | 0.260 | 0.244 | 0.236 | 0.224 | 0.244 | 0.235 | 0.224 | 0.249 | 0.285 | 0.241 | 0.202 | 0.270 | 0.220 | 0.265 | 0.262 | 0.265 | <b>0.243</b> |
| PKZBPL      | 0.224 | 0.226 | 0.280 | 0.280 | 0.263 | 0.266 | 0.260 | 0.250 | 0.266 | 0.260 | 0.249 | 0.270 | 0.288 | 0.269 | 0.206 | 0.293 | 0.244 | 0.284 | 0.283 | 0.283 | <b>0.262</b> |
| PKZBPW91    | 0.204 | 0.206 | 0.248 | 0.248 | 0.261 | 0.235 | 0.228 | 0.215 | 0.235 | 0.227 | 0.214 | 0.240 | 0.288 | 0.231 | 0.201 | 0.259 | 0.212 | 0.254 | 0.251 | 0.254 | <b>0.236</b> |
| PKZBRevTPSS | 0.200 | 0.203 | 0.238 | 0.239 | 0.259 | 0.227 | 0.219 | 0.205 | 0.227 | 0.218 | 0.205 | 0.233 | 0.288 | 0.223 | 0.199 | 0.247 | 0.204 | 0.243 | 0.241 | 0.243 | <b>0.228</b> |
| PKZBTPSS    | 0.205 | 0.207 | 0.260 | 0.260 | 0.259 | 0.244 | 0.235 | 0.223 | 0.243 | 0.235 | 0.223 | 0.249 | 0.285 | 0.241 | 0.202 | 0.270 | 0.220 | 0.265 | 0.262 | 0.265 | <b>0.243</b> |
| PKZBVP86    | 0.176 | 0.178 | 0.178 | 0.178 | 0.267 | 0.176 | 0.171 | 0.164 | 0.176 | 0.171 | 0.164 | 0.180 | 0.296 | 0.169 | 0.213 | 0.179 | 0.168 | 0.181 | 0.179 | 0.183 | <b>0.187</b> |
| PKZBVWN     | 0.217 | 0.219 | 0.252 | 0.252 | 0.261 | 0.242 | 0.237 | 0.225 | 0.241 | 0.236 | 0.224 | 0.246 | 0.291 | 0.244 | 0.203 | 0.265 | 0.223 | 0.255 | 0.256 | 0.255 | <b>0.242</b> |
| PKZBVWN5    | 0.224 | 0.226 | 0.281 | 0.281 | 0.263 | 0.266 | 0.261 | 0.250 | 0.266 | 0.260 | 0.250 | 0.271 | 0.288 | 0.270 | 0.206 | 0.293 | 0.244 | 0.284 | 0.284 | 0.284 | <b>0.263</b> |
| PW91B95     | 0.165 | 0.166 | 0.117 | 0.117 | 0.241 | 0.120 | 0.126 | 0.121 | 0.120 | 0.126 | 0.122 | 0.120 | 0.374 | 0.123 | 0.195 | 0.107 | 0.158 | 0.109 | 0.117 | 0.089 | <b>0.147</b> |
| PW91BRC     | 0.203 | 0.205 | 0.168 | 0.168 | 0.306 | 0.181 | 0.186 | 0.191 | 0.181 | 0.187 | 0.192 | 0.185 | 0.341 | 0.173 | 0.254 | 0.171 | 0.202 | 0.172 | 0.169 | 0.167 | <b>0.200</b> |
| PW91KCIS    | 0.204 | 0.206 | 0.159 | 0.159 | 0.295 | 0.164 | 0.170 | 0.175 | 0.164 | 0.171 | 0.176 | 0.169 | 0.336 | 0.161 | 0.247 | 0.153 | 0.197 | 0.154 | 0.162 | 0.154 | <b>0.189</b> |
| PW91LYP     | 0.325 | 0.325 | 0.290 | 0.290 | 0.379 | 0.289 | 0.295 | 0.297 | 0.290 | 0.296 | 0.298 | 0.291 | 0.463 | 0.292 | 0.345 | 0.285 | 0.309 | 0.290 | 0.291 | 0.288 | <b>0.312</b> |
| PW91P86     | 0.238 | 0.240 | 0.196 | 0.196 | 0.299 | 0.196 | 0.206 | 0.211 | 0.197 | 0.207 | 0.212 | 0.201 | 0.391 | 0.199 | 0.268 | 0.197 | 0.219 | 0.195 | 0.198 | 0.194 | <b>0.223</b> |
| PW91PBE     | 0.189 | 0.191 | 0.156 | 0.156 | 0.286 | 0.157 | 0.163 | 0.169 | 0.156 | 0.163 | 0.169 | 0.162 | 0.327 | 0.152 | 0.236 | 0.154 | 0.186 | 0.161 | 0.157 | 0.158 | <b>0.182</b> |
| PW91PKZB    | 0.187 | 0.190 | 0.161 | 0.160 | 0.286 | 0.157 | 0.163 | 0.168 | 0.157 | 0.163 | 0.169 | 0.164 | 0.326 | 0.153 | 0.236 | 0.158 | 0.186 | 0.164 | 0.161 | 0.162 | <b>0.184</b> |
| PW91PL      | 0.192 | 0.194 | 0.193 | 0.193 | 0.295 | 0.185 | 0.180 | 0.177 | 0.185 | 0.180 | 0.177 | 0.191 | 0.330 | 0.183 | 0.243 | 0.200 | 0.192 | 0.199 | 0.194 | 0.194 | <b>0.204</b> |
| PW91PW91    | 0.191 | 0.193 | 0.153 | 0.153 | 0.287 | 0.160 | 0.167 | 0.173 | 0.161 | 0.167 | 0.173 | 0.164 | 0.328 | 0.155 | 0.237 | 0.150 | 0.189 | 0.159 | 0.155 | 0.153 | <b>0.183</b> |
| PW91RevTPSS | 0.191 | 0.193 | 0.154 | 0.154 | 0.285 | 0.160 | 0.167 | 0.173 | 0.161 | 0.167 | 0.173 | 0.166 | 0.326 | 0.155 | 0.236 | 0.149 | 0.188 | 0.152 | 0.155 | 0.152 | <b>0.183</b> |
| PW91TPSS    | 0.187 | 0.189 | 0.159 | 0.159 | 0.285 | 0.156 | 0.161 | 0.168 | 0.156 | 0.162 | 0.168 | 0.163 | 0.327 | 0.151 | 0.235 | 0.157 | 0.185 | 0.163 | 0.160 | 0.161 | <b>0.183</b> |
| PW91VP86    | 0.237 | 0.239 | 0.195 | 0.195 | 0.298 | 0.196 | 0.205 | 0.211 | 0.197 | 0.206 | 0.212 | 0.201 | 0.390 | 0.199 | 0.268 | 0.196 | 0.218 | 0.194 | 0.197 | 0.193 | <b>0.222</b> |
| PW91VWN     | 0.196 | 0.198 | 0.185 | 0.185 | 0.293 | 0.180 | 0.178 | 0.184 | 0.180 | 0.179 | 0.184 | 0.184 | 0.330 | 0.177 | 0.245 | 0.192 | 0.196 | 0.190 | 0.186 | 0.185 | <b>0.201</b> |
| PW91VWN5    |       |       |       |       |       |       |       |       |       |       |       |       |       |       |       |       |       |       |       |       |              |

|               |       |       |       |       |       |       |       |       |       |       |       |       |       |       |       |       |       |       |       |       |              |
|---------------|-------|-------|-------|-------|-------|-------|-------|-------|-------|-------|-------|-------|-------|-------|-------|-------|-------|-------|-------|-------|--------------|
| RevTPSSKCIS   | 0.195 | 0.196 | 0.258 | 0.258 | 0.277 | 0.243 | 0.223 | 0.206 | 0.241 | 0.223 | 0.205 | 0.251 | 0.251 | 0.245 | 0.207 | 0.276 | 0.217 | 0.266 | 0.256 | 0.257 | <b>0.238</b> |
| RevTPSSLYP    | 0.275 | 0.276 | 0.249 | 0.249 | 0.355 | 0.253 | 0.258 | 0.261 | 0.254 | 0.259 | 0.262 | 0.257 | 0.392 | 0.256 | 0.314 | 0.246 | 0.272 | 0.249 | 0.252 | 0.249 | <b>0.272</b> |
| RevTPSSP86    | 0.108 | 0.113 | 0.145 | 0.144 | 0.215 | 0.135 | 0.119 | 0.099 | 0.136 | 0.118 | 0.098 | 0.149 | 0.242 | 0.140 | 0.151 | 0.126 | 0.115 | 0.141 | 0.138 | 0.143 | <b>0.139</b> |
| RevTPSSPBE    | 0.251 | 0.261 | 0.364 | 0.364 | 0.304 | 0.332 | 0.294 | 0.282 | 0.330 | 0.293 | 0.282 | 0.353 | 0.281 | 0.350 | 0.244 | 0.379 | 0.269 | 0.398 | 0.352 | 0.364 | <b>0.317</b> |
| RevTPSSPKZB   | 0.254 | 0.265 | 0.365 | 0.365 | 0.304 | 0.338 | 0.295 | 0.285 | 0.337 | 0.296 | 0.285 | 0.373 | 0.285 | 0.354 | 0.246 | 0.399 | 0.271 | 0.401 | 0.354 | 0.369 | <b>0.322</b> |
| RevTPSSPL     | 0.292 | 0.293 | 0.375 | 0.375 | 0.308 | 0.362 | 0.330 | 0.315 | 0.361 | 0.329 | 0.313 | 0.366 | 0.264 | 0.351 | 0.273 | 0.412 | 0.304 | 0.397 | 0.368 | 0.375 | <b>0.338</b> |
| RevTPSSPW91   | 0.245 | 0.255 | 0.350 | 0.350 | 0.303 | 0.322 | 0.287 | 0.276 | 0.321 | 0.287 | 0.276 | 0.326 | 0.273 | 0.345 | 0.239 | 0.366 | 0.263 | 0.384 | 0.346 | 0.349 | <b>0.308</b> |
| RevTPSSRevTPS | 0.239 | 0.241 | 0.337 | 0.337 | 0.293 | 0.305 | 0.277 | 0.265 | 0.306 | 0.276 | 0.264 | 0.311 | 0.265 | 0.330 | 0.223 | 0.348 | 0.251 | 0.369 | 0.331 | 0.340 | <b>0.295</b> |
| RevTPSSTPSS   | 0.252 | 0.263 | 0.366 | 0.366 | 0.303 | 0.339 | 0.296 | 0.285 | 0.338 | 0.297 | 0.285 | 0.374 | 0.282 | 0.354 | 0.245 | 0.400 | 0.271 | 0.401 | 0.354 | 0.369 | <b>0.322</b> |
| RevTPSSVP86   | 0.109 | 0.114 | 0.147 | 0.148 | 0.214 | 0.138 | 0.121 | 0.101 | 0.137 | 0.119 | 0.100 | 0.152 | 0.241 | 0.144 | 0.151 | 0.128 | 0.116 | 0.144 | 0.142 | 0.145 | <b>0.141</b> |
| RevTPSSVWN    | 0.263 | 0.264 | 0.317 | 0.317 | 0.293 | 0.315 | 0.284 | 0.275 | 0.313 | 0.282 | 0.275 | 0.319 | 0.268 | 0.313 | 0.253 | 0.370 | 0.274 | 0.349 | 0.315 | 0.315 | <b>0.299</b> |
| RevTPSSVWN5   | 0.294 | 0.295 | 0.377 | 0.377 | 0.308 | 0.363 | 0.332 | 0.316 | 0.362 | 0.331 | 0.315 | 0.367 | 0.264 | 0.353 | 0.274 | 0.414 | 0.306 | 0.403 | 0.370 | 0.380 | <b>0.340</b> |
| SB95          | 0.642 | 0.643 | 0.637 | 0.637 | 0.632 | 0.597 | 0.615 | 0.629 | 0.600 | 0.619 | 0.633 | 0.583 | 0.707 | 0.632 | 0.639 | 0.645 | 0.647 | 0.647 | 0.643 | 0.645 | <b>0.634</b> |
| SBRC          | 0.564 | 0.565 | 0.554 | 0.554 | 0.595 | 0.543 | 0.567 | 0.570 | 0.546 | 0.571 | 0.573 | 0.517 | 0.656 | 0.575 | 0.576 | 0.560 | 0.562 | 0.557 | 0.559 | 0.560 | <b>0.566</b> |
| SKCIS         | 0.601 | 0.604 | 0.594 | 0.594 | 0.621 | 0.577 | 0.601 | 0.605 | 0.580 | 0.605 | 0.608 | 0.551 | 0.681 | 0.610 | 0.611 | 0.601 | 0.601 | 0.597 | 0.598 | 0.598 | <b>0.602</b> |
| SLYP          | 0.699 | 0.701 | 0.695 | 0.695 | 0.714 | 0.677 | 0.695 | 0.697 | 0.679 | 0.698 | 0.700 | 0.654 | 0.757 | 0.694 | 0.704 | 0.696 | 0.699 | 0.695 | 0.696 | 0.696 | <b>0.697</b> |
| SP86          | 0.696 | 0.699 | 0.700 | 0.700 | 0.709 | 0.681 | 0.704 | 0.707 | 0.684 | 0.708 | 0.710 | 0.653 | 0.752 | 0.708 | 0.702 | 0.705 | 0.702 | 0.702 | 0.703 | 0.704 | <b>0.701</b> |
| SPBE          | 0.605 | 0.608 | 0.602 | 0.602 | 0.627 | 0.586 | 0.613 | 0.616 | 0.589 | 0.617 | 0.621 | 0.556 | 0.687 | 0.625 | 0.617 | 0.611 | 0.608 | 0.605 | 0.607 | 0.607 | <b>0.610</b> |
| SPKZB         | 0.591 | 0.594 | 0.586 | 0.586 | 0.613 | 0.572 | 0.598 | 0.601 | 0.576 | 0.602 | 0.605 | 0.543 | 0.675 | 0.610 | 0.603 | 0.596 | 0.592 | 0.589 | 0.591 | 0.591 | <b>0.596</b> |
| SPL           | 0.485 | 0.487 | 0.465 | 0.465 | 0.509 | 0.450 | 0.474 | 0.475 | 0.454 | 0.478 | 0.478 | 0.427 | 0.582 | 0.479 | 0.495 | 0.474 | 0.474 | 0.468 | 0.468 | 0.468 | <b>0.478</b> |
| SPW91         | 0.613 | 0.615 | 0.610 | 0.610 | 0.633 | 0.594 | 0.620 | 0.624 | 0.598 | 0.624 | 0.628 | 0.565 | 0.692 | 0.631 | 0.623 | 0.619 | 0.616 | 0.613 | 0.615 | 0.615 | <b>0.618</b> |
| SRevTPSS      | 0.604 | 0.606 | 0.599 | 0.599 | 0.625 | 0.585 | 0.610 | 0.613 | 0.588 | 0.614 | 0.617 | 0.556 | 0.683 | 0.620 | 0.614 | 0.608 | 0.605 | 0.602 | 0.603 | 0.604 | <b>0.608</b> |
| STPSS         | 0.594 | 0.596 | 0.589 | 0.589 | 0.616 | 0.575 | 0.600 | 0.604 | 0.578 | 0.604 | 0.608 | 0.545 | 0.677 | 0.612 | 0.605 | 0.598 | 0.595 | 0.592 | 0.593 | 0.594 | <b>0.598</b> |
| SVP86         | 0.696 | 0.699 | 0.700 | 0.700 | 0.709 | 0.681 | 0.704 | 0.707 | 0.684 | 0.708 | 0.711 | 0.653 | 0.752 | 0.708 | 0.702 | 0.705 | 0.702 | 0.702 | 0.703 | 0.704 | <b>0.701</b> |
| SVWN5         | 0.484 | 0.486 | 0.464 | 0.464 | 0.508 | 0.450 | 0.474 | 0.475 | 0.453 | 0.477 | 0.478 | 0.426 | 0.581 | 0.479 | 0.495 | 0.473 | 0.474 | 0.468 | 0.467 | 0.467 | <b>0.477</b> |
| TPSSB95       | 0.117 | 0.105 | 0.131 | 0.131 | 0.168 | 0.118 | 0.118 | 0.116 | 0.118 | 0.118 | 0.116 | 0.118 | 0.173 | 0.132 | 0.129 | 0.121 | 0.110 | 0.131 | 0.131 | 0.132 | <b>0.127</b> |
| TPSSBRC       | 0.206 | 0.210 | 0.253 | 0.254 | 0.279 | 0.247 | 0.239 | 0.222 | 0.247 | 0.239 | 0.221 | 0.253 | 0.286 | 0.242 | 0.214 | 0.275 | 0.221 | 0.267 | 0.251 | 0.259 | <b>0.244</b> |
| TPSSKCIS      | 0.176 | 0.181 | 0.207 | 0.207 | 0.262 | 0.213 | 0.211 | 0.185 | 0.211 | 0.210 | 0.183 | 0.218 | 0.279 | 0.214 | 0.194 | 0.235 | 0.191 | 0.220 | 0.207 | 0.205 | <b>0.210</b> |
| TPSSLYP       | 0.280 | 0.281 | 0.252 | 0.252 | 0.355 | 0.254 | 0.259 | 0.262 | 0.255 | 0.259 | 0.262 | 0.258 | 0.392 | 0.261 | 0.315 | 0.247 | 0.274 | 0.249 | 0.254 | 0.251 | <b>0.273</b> |
| TPSSP86       | 0.137 | 0.141 | 0.133 | 0.133 | 0.238 | 0.127 | 0.137 | 0.124 | 0.126 | 0.136 | 0.123 | 0.136 | 0.278 | 0.134 | 0.188 | 0.137 | 0.132 | 0.140 | 0.134 | 0.148 | <b>0.149</b> |
| TPSSPBE       | 0.223 | 0.224 | 0.280 | 0.280 | 0.281 | 0.256 | 0.242 | 0.232 | 0.255 | 0.241 | 0.232 | 0.262 | 0.271 | 0.270 | 0.225 | 0.308 | 0.237 | 0.301 | 0.279 | 0.278 | <b>0.259</b> |
| TPSSPKZB      | 0.230 | 0.240 | 0.283 | 0.283 | 0.281 | 0.259 | 0.245 | 0.235 | 0.258 | 0.244 | 0.234 | 0.267 | 0.272 | 0.272 | 0.227 | 0.311 | 0.242 | 0.309 | 0.281 | 0.282 | <b>0.263</b> |
| TPSSPL        | 0.245 | 0.245 | 0.293 | 0.293 | 0.281 | 0.293 | 0.277 | 0.262 | 0.293 | 0.277 | 0.262 | 0.298 | 0.273 | 0.300 | 0.243 | 0.331 | 0.257 | 0.306 | 0.293 | 0.290 | <b>0.281</b> |
| TPSSPW91      | 0.216 | 0.219 | 0.273 | 0.273 | 0.281 | 0.247 | 0.236 | 0.221 | 0.245 | 0.237 | 0.220 | 0.253 | 0.270 | 0.263 | 0.216 | 0.301 | 0.231 | 0.282 | 0.271 | 0.271 | <b>0.251</b> |
| TPSSRevTPSS   | 0.206 | 0.209 | 0.260 | 0.260 | 0.274 | 0.237 | 0.234 | 0.209 | 0.235 | 0.234 | 0.208 | 0.241 | 0.266 | 0.243 | 0.209 | 0.278 | 0.219 | 0.270 | 0.247 | 0.260 | <b>0.240</b> |
| TPSSTPSS      | 0.230 | 0.239 | 0.283 | 0.283 | 0.280 | 0.260 | 0.244 | 0.234 | 0.259 | 0.244 | 0.234 | 0.267 | 0.272 | 0.273 | 0.227 | 0.308 | 0.241 | 0.308 | 0.281 | 0.281 | <b>0.262</b> |
| TPSSVP86      | 0.137 | 0.142 | 0.133 | 0.133 | 0.237 | 0.127 | 0.138 | 0.123 | 0.127 | 0.137 | 0.124 | 0.137 | 0.278 | 0.135 | 0.188 | 0.138 | 0.132 | 0.141 | 0.134 | 0.149 | <b>0.150</b> |
| TPSSVWN       | 0.230 | 0.233 | 0.259 | 0.260 | 0.267 | 0.260 | 0.251 | 0.234 | 0.260 | 0.249 | 0.233 | 0.266 | 0.276 | 0.269 | 0.221 | 0.296 | 0.232 | 0.271 | 0.260 | 0.257 | <b>0.254</b> |
| TPSSVWN5      | 0.246 | 0.248 | 0.294 | 0.294 | 0.281 | 0.294 | 0.278 | 0.263 | 0.294 | 0.277 | 0.263 | 0.298 | 0.273 | 0.301 | 0.244 | 0.333 | 0.258 | 0.308 | 0.294 | 0.292 | <b>0.282</b> |
| wPBEhB95      | 0.119 | 0.120 | 0.108 | 0.108 | 0.213 | 0.049 | 0.099 | 0.082 | 0.049 | 0.100 | 0.082 | 0.066 | 0.316 | 0.037 | 0.188 | 0.084 | 0.114 | 0.105 | 0.097 | 0.110 | <b>0.112</b> |
| wPBEhBRC      | 0.184 | 0.187 | 0.159 | 0.159 | 0.288 | 0.162 | 0.157 | 0.163 | 0.161 | 0.157 | 0.163 | 0.170 | 0.325 | 0.153 | 0.235 | 0.164 | 0.180 | 0.162 | 0.160 | 0.161 | <b>0.183</b> |
| wPBEhKCIS     | 0.178 | 0.183 | 0.131 | 0.131 | 0.272 | 0.131 | 0.133 | 0.140 | 0.130 | 0.133 | 0.142 | 0.140 | 0.321 | 0.123 | 0.224 | 0.127 | 0.171 | 0.129 | 0.133 | 0.130 | <b>0.160</b> |
| wPBEhLYP      | 0.314 | 0.315 | 0.283 | 0.283 | 0.369 | 0.277 | 0.284 | 0.285 | 0.278 | 0.285 | 0.286 | 0.279 | 0.444 | 0.283 | 0.336 | 0.274 | 0.302 | 0.285 | 0.284 | 0.283 | <b>0.301</b> |
| wPBEhP86      | 0.221 | 0.224 | 0.174 | 0.174 | 0.278 | 0.167 | 0.182 | 0.189 | 0.168 | 0.184 | 0.191 | 0.172 | 0.363 | 0.164 | 0.247 | 0.176 | 0.202 | 0.181 | 0.180 | 0.178 | <b>0.201</b> |
| wPBEhPBE      | 0.159 | 0.164 | 0.141 | 0.141 | 0.262 | 0.141 | 0.132 | 0.128 | 0.139 | 0.132 | 0.128 | 0.151 | 0.305 | 0.133 | 0.211 | 0.142 | 0.158 | 0.144 | 0.142 | 0.143 | <b>0.160</b> |
| wPBEhPKZB     | 0.159 | 0.163 | 0.145 | 0.145 | 0.262 | 0.144 | 0.134 | 0.130 | 0.143 | 0.135 | 0.130 | 0.155 | 0.304 | 0.138 | 0.211 | 0.148 | 0.158 | 0.149 | 0.147 | 0.147 | <b>0.162</b> |
| wPBEhPL       | 0.184 | 0.187 | 0.190 | 0.189 | 0.277 | 0.186 | 0.178 | 0.171 | 0.186 | 0.178 | 0.171 | 0.192 | 0.312 | 0.185 | 0.222 | 0.203 | 0.181 | 0.198 | 0.190 | 0.189 | <b>0.198</b> |
| wPBEhPW91     | 0.163 | 0.167 | 0.140 | 0.140 | 0.263 | 0.136 | 0.134 | 0.134 | 0.135 | 0.134 | 0.134 | 0.147 | 0.307 | 0.131 | 0.212 | 0.136 | 0.160 | 0.139 | 0.141 | 0.141 | <b>0.160</b> |
| wPBEhRevTPSS  | 0.165 | 0.169 | 0.135 | 0.135 | 0.261 | 0.136 | 0.131 | 0.135 | 0.136 | 0.131 | 0.135 | 0.147 | 0.307 | 0.127 | 0.212 | 0.135 | 0.161 | 0.137 | 0.137 | 0.138 | <b>0.158</b> |
| wPBEhTPSS     | 0.159 | 0.163 | 0.144 | 0.144 | 0.262 | 0.143 | 0.134 | 0.129 | 0.142 | 0.134 | 0.129 | 0.153 | 0.305 | 0.136 | 0.211 | 0.147 | 0.158 | 0.148 | 0.146 | 0.146 | <b>0.162</b> |
| wPBEhVP86     | 0.220 | 0.223 | 0.174 | 0.174 | 0.278 | 0.167 | 0.181 | 0.188 | 0.167 | 0.182 | 0.189 | 0.171 | 0.361 | 0.163 | 0.245 | 0.175 | 0.201 | 0.180 | 0.179 | 0.177 | <b>0.200</b> |
| wPBEhVWN      | 0.177 | 0.180 | 0.182 | 0.182 | 0.277 | 0.181 | 0.170 | 0.165 | 0.181 | 0.169 | 0.164 | 0.186 | 0.314 | 0.178 | 0.225 | 0.190 | 0.174 | 0.185 | 0.183 | 0.182 | <b>0.192</b> |
| wPBEhVWN5     | 0.184 | 0.187 | 0.190 | 0.190 | 0.276 | 0.186 | 0.178 | 0.171 | 0.186 | 0.178 | 0.171 | 0.192 | 0.312 | 0.185 | 0.222 | 0.203 | 0.182 | 0.199 | 0.190 | 0.191 | <b>0.199</b> |
| XaB95         | 0.679 | 0.680 | 0.679 | 0.679 | 0.692 | 0.646 | 0.683 | 0.688 | 0.650 | 0.686 | 0.691 | 0.610 | 0.755 | 0.675 | 0.683 | 0.684 | 0.682 | 0.683 | 0.682 | 0.684 | <b>0.680</b> |
| XaKCIS        | 0.    |       |       |       |       |       |       |       |       |       |       |       |       |       |       |       |       |       |       |       |              |

|               |              |              |              |              |       |              |              |              |              |              |              |              |       |       |       |              |              |              |              |       |              |
|---------------|--------------|--------------|--------------|--------------|-------|--------------|--------------|--------------|--------------|--------------|--------------|--------------|-------|-------|-------|--------------|--------------|--------------|--------------|-------|--------------|
| XaP86         | 0.735        | 0.738        | 0.744        | 0.744        | 0.746 | 0.724        | 0.747        | 0.750        | 0.728        | 0.751        | 0.754        | 0.695        | 0.781 | 0.749 | 0.740 | 0.748        | 0.745        | 0.746        | 0.747        | 0.748 | <b>0.743</b> |
| XaPBE         | 0.649        | 0.651        | 0.654        | 0.654        | 0.666 | 0.635        | 0.662        | 0.666        | 0.640        | 0.666        | 0.670        | 0.604        | 0.719 | 0.672 | 0.658 | 0.661        | 0.657        | 0.656        | 0.658        | 0.659 | <b>0.658</b> |
| XaPKZB        | 0.635        | 0.638        | 0.638        | 0.638        | 0.653 | 0.622        | 0.647        | 0.651        | 0.626        | 0.651        | 0.655        | 0.592        | 0.706 | 0.657 | 0.644 | 0.646        | 0.641        | 0.640        | 0.642        | 0.643 | <b>0.643</b> |
| XaPL          | 0.533        | 0.534        | 0.521        | 0.521        | 0.552 | 0.507        | 0.530        | 0.530        | 0.511        | 0.534        | 0.534        | 0.482        | 0.615 | 0.536 | 0.541 | 0.529        | 0.528        | 0.525        | 0.524        | 0.524 | <b>0.531</b> |
| XaPW91        | 0.656        | 0.659        | 0.662        | 0.662        | 0.672 | 0.643        | 0.669        | 0.672        | 0.647        | 0.673        | 0.676        | 0.612        | 0.723 | 0.678 | 0.665 | 0.668        | 0.664        | 0.664        | 0.665        | 0.666 | <b>0.665</b> |
| XaRevTPSS     | 0.647        | 0.649        | 0.650        | 0.650        | 0.663 | 0.634        | 0.658        | 0.661        | 0.637        | 0.662        | 0.665        | 0.604        | 0.714 | 0.666 | 0.655 | 0.657        | 0.653        | 0.653        | 0.653        | 0.654 | <b>0.654</b> |
| XaTPSS        | 0.638        | 0.640        | 0.641        | 0.641        | 0.655 | 0.624        | 0.649        | 0.653        | 0.628        | 0.654        | 0.657        | 0.594        | 0.708 | 0.659 | 0.647 | 0.648        | 0.644        | 0.643        | 0.645        | 0.645 | <b>0.646</b> |
| XaVP86        | 0.685        | 0.688        | 0.689        | 0.689        | 0.746 | 0.671        | 0.696        | 0.698        | 0.728        | 0.699        | 0.700        | 0.695        | 0.741 | 0.704 | 0.689 | 0.696        | 0.692        | 0.693        | 0.694        | 0.695 | <b>0.699</b> |
| XaVWN         | 0.551        | 0.552        | 0.542        | 0.542        | 0.568 | 0.489        | 0.508        | 0.551        | 0.492        | 0.512        | 0.555        | 0.464        | 0.628 | 0.538 | 0.558 | 0.550        | 0.548        | 0.545        | 0.544        | 0.545 | <b>0.539</b> |
| XaVWN5        | 0.532        | 0.534        | 0.495        | 0.495        | 0.551 | 0.471        | 0.491        | 0.530        | 0.474        | 0.495        | 0.534        | 0.446        | 0.615 | 0.521 | 0.540 | 0.529        | 0.499        | 0.524        | 0.523        | 0.523 | <b>0.516</b> |
| LC-BB95       | <b>0.070</b> | <b>0.060</b> | <b>0.099</b> | <b>0.099</b> | 0.158 | <b>0.086</b> | <b>0.086</b> | <b>0.084</b> | <b>0.086</b> | <b>0.086</b> | <b>0.085</b> | <b>0.085</b> | 0.229 | 0.107 | 0.111 | <b>0.086</b> | <b>0.096</b> | <b>0.097</b> | <b>0.099</b> | 0.101 | <b>0.100</b> |
| LC-BBRC       | 0.120        | 0.124        | 0.361        | 0.361        | 0.265 | 0.324        | 0.251        | 0.223        | 0.329        | 0.249        | 0.222        | 0.348        | 0.304 | 0.316 | 0.233 | 0.268        | 0.242        | 0.378        | 0.360        | 0.437 | <b>0.286</b> |
| LC-BKCIS      | <b>0.074</b> | <b>0.081</b> | 0.184        | 0.184        | 0.224 | 0.199        | 0.135        | 0.114        | 0.198        | 0.133        | 0.113        | 0.189        | 0.280 | 0.169 | 0.177 | 0.139        | 0.139        | 0.183        | 0.181        | 0.206 | <b>0.165</b> |
| LC-BLYP       | 0.347        | 0.348        | 0.302        | 0.301        | 0.405 | 0.309        | 0.320        | 0.318        | 0.310        | 0.322        | 0.320        | 0.303        | 0.499 | 0.319 | 0.361 | 0.306        | 0.317        | 0.300        | 0.303        | 0.301 | <b>0.331</b> |
| LC-BP86       | 0.173        | 0.174        | 0.463        | 0.459        | 0.238 | 0.205        | 0.160        | 0.167        | 0.204        | 0.162        | 0.176        | 0.199        | 0.364 | 0.326 | 0.289 | 0.207        | 0.388        | 0.419        | 0.467        | 0.493 | <b>0.287</b> |
| LC-BPBE       | 0.146        | 0.142        | 0.571        | 0.570        | 0.285 | 0.488        | 0.458        | 0.378        | 0.484        | 0.458        | 0.379        | 0.485        | 0.237 | 0.435 | 0.265 | 0.456        | 0.345        | 0.543        | 0.572        | 0.588 | <b>0.414</b> |
| LC-BPKZB      | 0.154        | 0.150        | 0.568        | 0.571        | 0.293 | 0.486        | 0.460        | 0.381        | 0.482        | 0.458        | 0.382        | 0.497        | 0.226 | 0.445 | 0.289 | 0.487        | 0.346        | 0.542        | 0.573        | 0.590 | <b>0.419</b> |
| LC-BPL        | 0.209        | 0.211        | 0.494        | 0.494        | 0.295 | 0.457        | 0.397        | 0.354        | 0.457        | 0.389        | 0.353        | 0.456        | 0.272 | 0.458 | 0.269 | 0.480        | 0.329        | 0.514        | 0.522        | 0.558 | <b>0.398</b> |
| LC-BPW91      | 0.129        | 0.124        | 0.563        | 0.563        | 0.258 | 0.476        | 0.409        | 0.328        | 0.470        | 0.392        | 0.314        | 0.472        | 0.237 | 0.418 | 0.248 | 0.410        | 0.332        | 0.539        | 0.591        | 0.581 | <b>0.393</b> |
| LC-BRevTPSS   | 0.103        | 0.100        | 0.517        | 0.519        | 0.230 | 0.444        | 0.304        | 0.250        | 0.437        | 0.308        | 0.243        | 0.437        | 0.236 | 0.390 | 0.226 | 0.392        | 0.310        | 0.463        | 0.509        | 0.543 | <b>0.348</b> |
| LC-BTPSS      | 0.151        | 0.146        | 0.571        | 0.570        | 0.299 | 0.486        | 0.458        | 0.383        | 0.482        | 0.458        | 0.382        | 0.490        | 0.240 | 0.440 | 0.278 | 0.484        | 0.346        | 0.544        | 0.573        | 0.601 | <b>0.419</b> |
| LC-BVP86      | 0.170        | 0.171        | 0.474        | 0.470        | 0.234 | 0.206        | 0.157        | 0.168        | 0.201        | 0.163        | 0.170        | 0.212        | 0.363 | 0.326 | 0.294 | 0.205        | 0.385        | 0.402        | 0.467        | 0.484 | <b>0.286</b> |
| LC-BVWN       | 0.170        | 0.178        | 0.381        | 0.381        | 0.263 | 0.354        | 0.294        | 0.268        | 0.353        | 0.293        | 0.268        | 0.355        | 0.275 | 0.358 | 0.238 | 0.341        | 0.268        | 0.402        | 0.385        | 0.413 | <b>0.312</b> |
| LC-BVWN5      | 0.211        | 0.213        | 0.509        | 0.509        | 0.297 | 0.471        | 0.403        | 0.364        | 0.470        | 0.402        | 0.364        | 0.466        | 0.273 | 0.461 | 0.270 | 0.504        | 0.343        | 0.551        | 0.526        | 0.604 | <b>0.410</b> |
| LC-BRxB95     | <b>0.061</b> | <b>0.061</b> | 0.101        | 0.101        | 0.158 | <b>0.088</b> | <b>0.088</b> | <b>0.086</b> | <b>0.088</b> | <b>0.088</b> | <b>0.086</b> | <b>0.087</b> | 0.228 | 0.107 | 0.112 | <b>0.088</b> | <b>0.098</b> | <b>0.098</b> | 0.101        | 0.102 | <b>0.101</b> |
| LC-BRxBRC     | 0.115        | 0.119        | 0.367        | 0.367        | 0.265 | 0.295        | 0.227        | 0.218        | 0.299        | 0.227        | 0.217        | 0.302        | 0.302 | 0.273 | 0.228 | 0.240        | 0.245        | 0.368        | 0.361        | 0.433 | <b>0.273</b> |
| LC-BRxKCIS    | <b>0.073</b> | <b>0.079</b> | 0.181        | 0.181        | 0.221 | 0.144        | 0.119        | <b>0.096</b> | 0.143        | 0.119        | <b>0.095</b> | 0.148        | 0.280 | 0.139 | 0.170 | 0.105        | 0.128        | 0.175        | 0.176        | 0.186 | <b>0.148</b> |
| LC-BRxLYP     | 0.360        | 0.360        | 0.319        | 0.319        | 0.414 | 0.327        | 0.342        | 0.339        | 0.329        | 0.343        | 0.341        | 0.322        | 0.504 | 0.340 | 0.373 | 0.329        | 0.333        | 0.320        | 0.321        | 0.320 | <b>0.348</b> |
| LC-BRxP86     | 0.187        | 0.189        | 0.475        | 0.475        | 0.252 | 0.210        | 0.236        | 0.235        | 0.211        | 0.223        | 0.237        | 0.201        | 0.371 | 0.339 | 0.316 | 0.227        | 0.406        | 0.402        | 0.483        | 0.520 | <b>0.310</b> |
| LC-BRxPBE     | 0.143        | 0.139        | 0.579        | 0.578        | 0.284 | 0.487        | 0.364        | 0.326        | 0.475        | 0.358        | 0.307        | 0.478        | 0.228 | 0.430 | 0.250 | 0.409        | 0.347        | 0.523        | 0.574        | 0.605 | <b>0.394</b> |
| LC-BRxPKZB    | 0.160        | 0.146        | 0.563        | 0.562        | 0.285 | 0.489        | 0.392        | 0.325        | 0.477        | 0.390        | 0.323        | 0.491        | 0.218 | 0.440 | 0.263 | 0.478        | 0.350        | 0.525        | 0.577        | 0.592 | <b>0.402</b> |
| LC-BRxPL      | 0.211        | 0.212        | 0.502        | 0.502        | 0.283 | 0.448        | 0.366        | 0.324        | 0.448        | 0.367        | 0.323        | 0.445        | 0.270 | 0.479 | 0.268 | 0.441        | 0.355        | 0.521        | 0.544        | 0.540 | <b>0.392</b> |
| LC-BRxPW91    | 0.127        | 0.120        | 0.540        | 0.540        | 0.261 | 0.447        | 0.328        | 0.245        | 0.443        | 0.323        | 0.244        | 0.461        | 0.227 | 0.403 | 0.231 | 0.377        | 0.338        | 0.513        | 0.559        | 0.562 | <b>0.364</b> |
| LC-BRxRevTPSS | <b>0.098</b> | <b>0.095</b> | 0.489        | 0.490        | 0.228 | 0.370        | 0.269        | 0.217        | 0.368        | 0.264        | 0.216        | 0.388        | 0.228 | 0.353 | 0.219 | 0.302        | 0.309        | 0.459        | 0.500        | 0.545 | <b>0.320</b> |
| LC-BRxTPSS    | 0.148        | 0.143        | 0.577        | 0.579        | 0.286 | 0.489        | 0.392        | 0.329        | 0.478        | 0.388        | 0.308        | 0.493        | 0.218 | 0.440 | 0.251 | 0.451        | 0.348        | 0.539        | 0.580        | 0.591 | <b>0.401</b> |
| LC-BRxVP86    | 0.185        | 0.186        | 0.469        | 0.464        | 0.248 | 0.211        | 0.208        | 0.223        | 0.210        | 0.218        | 0.229        | 0.197        | 0.363 | 0.343 | 0.313 | 0.223        | 0.396        | 0.433        | 0.479        | 0.509 | <b>0.305</b> |
| LC-BRxVWN     | 0.169        | 0.179        | 0.377        | 0.377        | 0.262 | 0.335        | 0.268        | 0.247        | 0.334        | 0.267        | 0.247        | 0.338        | 0.271 | 0.343 | 0.223 | 0.314        | 0.269        | 0.373        | 0.374        | 0.418 | <b>0.299</b> |
| LC-BRxVWN5    | 0.214        | 0.216        | 0.504        | 0.504        | 0.286 | 0.450        | 0.370        | 0.328        | 0.450        | 0.369        | 0.329        | 0.448        | 0.269 | 0.481 | 0.268 | 0.446        | 0.335        | 0.528        | 0.529        | 0.560 | <b>0.394</b> |
| LC-G96B95     | <b>0.070</b> | <b>0.070</b> | <b>0.099</b> | <b>0.099</b> | 0.158 | <b>0.086</b> | <b>0.086</b> | <b>0.085</b> | <b>0.086</b> | <b>0.086</b> | <b>0.085</b> | <b>0.085</b> | 0.229 | 0.107 | 0.111 | <b>0.086</b> | <b>0.096</b> | <b>0.097</b> | 0.100        | 0.101 | <b>0.101</b> |
| LC-G96BRC     | 0.120        | 0.124        | 0.366        | 0.366        | 0.264 | 0.336        | 0.251        | 0.229        | 0.334        | 0.250        | 0.226        | 0.338        | 0.303 | 0.320 | 0.232 | 0.272        | 0.243        | 0.384        | 0.375        | 0.439 | <b>0.289</b> |
| LC-G96KCIS    | <b>0.076</b> | <b>0.083</b> | 0.190        | 0.190        | 0.222 | 0.200        | 0.135        | 0.114        | 0.199        | 0.133        | 0.113        | 0.191        | 0.279 | 0.171 | 0.176 | 0.140        | 0.147        | 0.184        | 0.187        | 0.221 | <b>0.168</b> |
| LC-G96LYP     | 0.347        | 0.347        | 0.301        | 0.301        | 0.405 | 0.309        | 0.320        | 0.318        | 0.310        | 0.322        | 0.319        | 0.303        | 0.498 | 0.319 | 0.361 | 0.307        | 0.317        | 0.301        | 0.302        | 0.300 | <b>0.330</b> |
| LC-G96P86     | 0.170        | 0.172        | 0.463        | 0.462        | 0.233 | 0.206        | 0.161        | 0.168        | 0.205        | 0.163        | 0.174        | 0.214        | 0.363 | 0.327 | 0.293 | 0.205        | 0.385        | 0.365        | 0.463        | 0.486 | <b>0.284</b> |
| LC-G96PBE     | 0.154        | 0.141        | 0.571        | 0.571        | 0.284 | 0.485        | 0.458        | 0.379        | 0.499        | 0.457        | 0.374        | 0.482        | 0.237 | 0.438 | 0.272 | 0.469        | 0.346        | 0.543        | 0.572        | 0.580 | <b>0.416</b> |
| LC-G96PKZB    | 0.157        | 0.149        | 0.571        | 0.571        | 0.304 | 0.497        | 0.459        | 0.381        | 0.487        | 0.460        | 0.381        | 0.486        | 0.224 | 0.448 | 0.289 | 0.475        | 0.349        | 0.544        | 0.573        | 0.598 | <b>0.420</b> |
| LC-G96PL      | 0.210        | 0.211        | 0.495        | 0.495        | 0.293 | 0.457        | 0.395        | 0.353        | 0.456        | 0.393        | 0.352        | 0.460        | 0.273 | 0.459 | 0.267 | 0.480        | 0.330        | 0.514        | 0.507        | 0.526 | <b>0.396</b> |
| LC-G96PW91    | 0.131        | 0.124        | 0.565        | 0.564        | 0.274 | 0.474        | 0.419        | 0.328        | 0.471        | 0.416        | 0.336        | 0.471        | 0.235 | 0.421 | 0.240 | 0.444        | 0.336        | 0.536        | 0.575        | 0.586 | <b>0.397</b> |
| LC-G96RevTPSS | 0.105        | 0.101        | 0.521        | 0.523        | 0.244 | 0.441        | 0.322        | 0.263        | 0.439        | 0.304        | 0.261        | 0.418        | 0.234 | 0.394 | 0.227 | 0.389        | 0.312        | 0.465        | 0.512        | 0.546 | <b>0.351</b> |
| LC-G96TPSS    | 0.160        | 0.149        | 0.572        | 0.571        | 0.292 | 0.487        | 0.475        | 0.381        | 0.482        | 0.459        | 0.383        | 0.487        | 0.238 | 0.441 | 0.286 | 0.476        | 0.356        | 0.544        | 0.574        | 0.616 | <b>0.421</b> |
| LC-G96VP86    | 0.166        | 0.168        | 0.474        | 0.474        | 0.232 | 0.207        | 0.155        | 0.175        | 0.202        | 0.156        | 0.168        | 0.211        | 0.362 | 0.329 | 0.291 | 0.203        | 0.381        | 0.399        | 0.464        | 0.486 | <b>0.285</b> |
| LC-G96VWN     | 0.171        | 0.178        | 0.384        | 0.384        | 0.262 | 0.355        | 0.294        | 0.268        | 0.353        | 0.293        | 0.268        | 0.354        | 0.274 | 0.358 | 0.237 | 0.342        | 0.268        | 0.406        | 0.386        | 0.416 | <b>0.312</b> |
| LC-G96VWN5    | 0.212        | 0.214        | 0.509        | 0.509        | 0.299 | 0.468        | 0.405        | 0.360        | 0.469        | 0.402        | 0.359        | 0.466        | 0.271 | 0.461 | 0.269 | 0.503        | 0.344        | 0.550        | 0.527        | 0.574 | <b>0.409</b> |
| LC-LGB95      | <b>0.060</b> | <b>0.060</b> | <b>0.099</b> | <b>0.099</b> | 0.159 | <b>0.086</b> | <b>0.086</b> | <b>0.084</b> | <b>0.086</b> | <b>0.086</b> | <b>0.084</b> | <b>0.085</b> | 0.230 | 0.107 | 0.111 | <b>0.085</b> | <b>0.095</b> | <b>0</b>     |              |       |              |



|               |              |              |              |              |       |              |              |              |              |              |              |              |       |       |       |              |              |              |              |       |              |
|---------------|--------------|--------------|--------------|--------------|-------|--------------|--------------|--------------|--------------|--------------|--------------|--------------|-------|-------|-------|--------------|--------------|--------------|--------------|-------|--------------|
| LC-LGPBE      | 0.143        | 0.140        | 0.561        | 0.561        | 0.288 | 0.491        | 0.457        | 0.378        | 0.488        | 0.458        | 0.378        | 0.490        | 0.240 | 0.462 | 0.269 | 0.486        | 0.342        | 0.563        | 0.571        | 0.590 | <b>0.418</b> |
| LC-LGPKZB     | 0.149        | 0.145        | 0.562        | 0.563        | 0.281 | 0.484        | 0.459        | 0.387        | 0.491        | 0.460        | 0.386        | 0.487        | 0.229 | 0.492 | 0.291 | 0.490        | 0.345        | 0.563        | 0.574        | 0.594 | <b>0.421</b> |
| LC-LGPL       | 0.208        | 0.209        | 0.509        | 0.509        | 0.289 | 0.470        | 0.398        | 0.360        | 0.470        | 0.398        | 0.382        | 0.462        | 0.275 | 0.485 | 0.272 | 0.484        | 0.330        | 0.532        | 0.527        | 0.548 | <b>0.406</b> |
| LC-LGPW91     | 0.127        | 0.120        | 0.558        | 0.555        | 0.260 | 0.476        | 0.414        | 0.324        | 0.474        | 0.414        | 0.326        | 0.479        | 0.238 | 0.448 | 0.252 | 0.423        | 0.330        | 0.534        | 0.547        | 0.582 | <b>0.394</b> |
| LC-LGRevTPSS  | 0.100        | <b>0.097</b> | 0.510        | 0.508        | 0.234 | 0.441        | 0.333        | 0.248        | 0.415        | 0.334        | 0.251        | 0.441        | 0.238 | 0.409 | 0.230 | 0.380        | 0.307        | 0.465        | 0.509        | 0.551 | <b>0.350</b> |
| LC-LGTPSS     | 0.145        | 0.145        | 0.563        | 0.563        | 0.286 | 0.486        | 0.459        | 0.385        | 0.482        | 0.459        | 0.386        | 0.483        | 0.243 | 0.469 | 0.281 | 0.491        | 0.343        | 0.564        | 0.568        | 0.592 | <b>0.420</b> |
| LC-LGVP86     | 0.175        | 0.175        | 0.477        | 0.474        | 0.241 | 0.214        | 0.158        | 0.168        | 0.216        | 0.158        | 0.171        | 0.209        | 0.367 | 0.301 | 0.298 | 0.207        | 0.397        | 0.423        | 0.473        | 0.495 | <b>0.290</b> |
| LC-LGVWN      | 0.169        | 0.179        | 0.391        | 0.391        | 0.266 | 0.356        | 0.298        | 0.272        | 0.354        | 0.298        | 0.272        | 0.363        | 0.277 | 0.356 | 0.234 | 0.341        | 0.268        | 0.401        | 0.388        | 0.417 | <b>0.315</b> |
| LC-LGVWN5     | 0.211        | 0.212        | 0.524        | 0.524        | 0.295 | 0.479        | 0.408        | 0.370        | 0.478        | 0.409        | 0.366        | 0.471        | 0.275 | 0.490 | 0.274 | 0.512        | 0.337        | 0.552        | 0.532        | 0.567 | <b>0.414</b> |
| LC-mPWB95     | <b>0.060</b> | <b>0.060</b> | <b>0.099</b> | <b>0.099</b> | 0.158 | <b>0.086</b> | <b>0.086</b> | <b>0.085</b> | <b>0.086</b> | <b>0.086</b> | <b>0.085</b> | <b>0.085</b> | 0.229 | 0.107 | 0.111 | <b>0.086</b> | <b>0.096</b> | <b>0.097</b> | <b>0.099</b> | 0.101 | <b>0.100</b> |
| LC-mPWBRC     | 0.119        | 0.123        | 0.360        | 0.360        | 0.266 | 0.329        | 0.249        | 0.222        | 0.317        | 0.249        | 0.221        | 0.332        | 0.304 | 0.303 | 0.232 | 0.268        | 0.241        | 0.377        | 0.360        | 0.435 | <b>0.283</b> |
| LC-mPWKCIS    | <b>0.074</b> | <b>0.081</b> | 0.184        | 0.184        | 0.224 | 0.198        | 0.132        | 0.112        | 0.196        | 0.132        | 0.111        | 0.188        | 0.281 | 0.155 | 0.177 | 0.137        | 0.139        | 0.182        | 0.180        | 0.204 | <b>0.164</b> |
| LC-mPWLYP     | 0.348        | 0.349        | 0.303        | 0.303        | 0.406 | 0.310        | 0.321        | 0.319        | 0.311        | 0.323        | 0.321        | 0.304        | 0.499 | 0.320 | 0.362 | 0.308        | 0.318        | 0.301        | 0.304        | 0.302 | <b>0.332</b> |
| LC-mPWP86     | 0.174        | 0.175        | 0.463        | 0.459        | 0.240 | 0.204        | 0.162        | 0.171        | 0.210        | 0.162        | 0.177        | 0.199        | 0.365 | 0.329 | 0.290 | 0.209        | 0.389        | 0.419        | 0.467        | 0.493 | <b>0.288</b> |
| LC-mPWPBE     | 0.148        | 0.141        | 0.573        | 0.574        | 0.284 | 0.490        | 0.458        | 0.377        | 0.480        | 0.458        | 0.372        | 0.483        | 0.237 | 0.437 | 0.273 | 0.456        | 0.343        | 0.564        | 0.571        | 0.588 | <b>0.415</b> |
| LC-mPWPKZB    | 0.153        | 0.148        | 0.588        | 0.571        | 0.292 | 0.496        | 0.475        | 0.382        | 0.485        | 0.455        | 0.382        | 0.489        | 0.226 | 0.447 | 0.279 | 0.474        | 0.347        | 0.566        | 0.571        | 0.590 | <b>0.421</b> |
| LC-mPWPL      | 0.208        | 0.211        | 0.495        | 0.495        | 0.294 | 0.456        | 0.388        | 0.353        | 0.456        | 0.388        | 0.352        | 0.454        | 0.274 | 0.457 | 0.269 | 0.479        | 0.329        | 0.514        | 0.506        | 0.557 | <b>0.397</b> |
| LC-mPWPW91    | 0.128        | 0.122        | 0.563        | 0.563        | 0.260 | 0.471        | 0.399        | 0.326        | 0.470        | 0.391        | 0.341        | 0.485        | 0.237 | 0.419 | 0.254 | 0.401        | 0.332        | 0.537        | 0.553        | 0.580 | <b>0.392</b> |
| LC-mPWRevTPS  | 0.103        | <b>0.099</b> | 0.518        | 0.518        | 0.231 | 0.438        | 0.302        | 0.242        | 0.433        | 0.320        | 0.249        | 0.416        | 0.236 | 0.412 | 0.226 | 0.389        | 0.309        | 0.466        | 0.510        | 0.549 | <b>0.348</b> |
| LC-mPWTPSS    | 0.147        | 0.146        | 0.588        | 0.589        | 0.302 | 0.490        | 0.458        | 0.382        | 0.483        | 0.473        | 0.381        | 0.490        | 0.239 | 0.443 | 0.273 | 0.475        | 0.345        | 0.563        | 0.590        | 0.591 | <b>0.422</b> |
| LC-mPWVP86    | 0.171        | 0.172        | 0.470        | 0.474        | 0.235 | 0.201        | 0.163        | 0.171        | 0.201        | 0.163        | 0.167        | 0.203        | 0.364 | 0.325 | 0.295 | 0.206        | 0.385        | 0.402        | 0.466        | 0.490 | <b>0.286</b> |
| LC-mPWVWN     | 0.171        | 0.177        | 0.380        | 0.381        | 0.263 | 0.353        | 0.293        | 0.267        | 0.352        | 0.293        | 0.267        | 0.354        | 0.275 | 0.356 | 0.238 | 0.340        | 0.267        | 0.396        | 0.384        | 0.412 | <b>0.311</b> |
| LC-mPWVWN5    | 0.211        | 0.212        | 0.508        | 0.508        | 0.297 | 0.470        | 0.402        | 0.361        | 0.469        | 0.401        | 0.359        | 0.465        | 0.273 | 0.460 | 0.270 | 0.504        | 0.338        | 0.550        | 0.527        | 0.579 | <b>0.408</b> |
| LC-OB95       | <b>0.082</b> | <b>0.082</b> | <b>0.099</b> | <b>0.099</b> | 0.172 | <b>0.086</b> | <b>0.086</b> | <b>0.084</b> | <b>0.086</b> | <b>0.086</b> | <b>0.084</b> | <b>0.085</b> | 0.229 | 0.106 | 0.110 | <b>0.086</b> | <b>0.097</b> | <b>0.097</b> | <b>0.099</b> | 0.100 | <b>0.103</b> |
| LC-OBRC       | 0.124        | 0.129        | 0.357        | 0.357        | 0.267 | 0.352        | 0.254        | 0.230        | 0.350        | 0.253        | 0.229        | 0.353        | 0.302 | 0.321 | 0.235 | 0.281        | 0.239        | 0.380        | 0.358        | 0.434 | <b>0.290</b> |
| LC-OKCIS      | <b>0.082</b> | <b>0.088</b> | 0.185        | 0.185        | 0.223 | 0.201        | 0.136        | 0.116        | 0.200        | 0.135        | 0.115        | 0.193        | 0.278 | 0.178 | 0.178 | 0.147        | 0.137        | 0.182        | 0.186        | 0.202 | <b>0.167</b> |
| LC-OLYP       | 0.345        | 0.346        | 0.300        | 0.301        | 0.404 | 0.307        | 0.318        | 0.317        | 0.309        | 0.321        | 0.318        | 0.302        | 0.495 | 0.322 | 0.359 | 0.303        | 0.317        | 0.300        | 0.301        | 0.300 | <b>0.329</b> |
| LC-OP86       | 0.163        | 0.165        | 0.461        | 0.457        | 0.229 | 0.206        | 0.159        | 0.179        | 0.202        | 0.165        | 0.166        | 0.214        | 0.360 | 0.330 | 0.287 | 0.198        | 0.303        | 0.399        | 0.468        | 0.486 | <b>0.280</b> |
| LC-OPBE       | 0.161        | 0.148        | 0.570        | 0.570        | 0.304 | 0.519        | 0.460        | 0.378        | 0.501        | 0.461        | 0.377        | 0.499        | 0.235 | 0.472 | 0.268 | 0.487        | 0.345        | 0.560        | 0.573        | 0.589 | <b>0.424</b> |
| LC-OPKZB      | 0.171        | 0.168        | 0.571        | 0.571        | 0.305 | 0.504        | 0.463        | 0.383        | 0.500        | 0.462        | 0.385        | 0.503        | 0.223 | 0.480 | 0.290 | 0.488        | 0.345        | 0.541        | 0.574        | 0.592 | <b>0.426</b> |
| LC-OPL        | 0.209        | 0.210        | 0.491        | 0.491        | 0.293 | 0.464        | 0.400        | 0.356        | 0.464        | 0.399        | 0.354        | 0.460        | 0.272 | 0.463 | 0.269 | 0.487        | 0.326        | 0.509        | 0.503        | 0.522 | <b>0.397</b> |
| LC-OPW91      | 0.134        | 0.130        | 0.545        | 0.560        | 0.259 | 0.489        | 0.437        | 0.346        | 0.488        | 0.424        | 0.326        | 0.491        | 0.234 | 0.427 | 0.257 | 0.443        | 0.332        | 0.536        | 0.577        | 0.571 | <b>0.400</b> |
| LC-ORevTPSS   | 0.107        | 0.104        | 0.481        | 0.481        | 0.233 | 0.479        | 0.337        | 0.307        | 0.480        | 0.336        | 0.286        | 0.481        | 0.232 | 0.389 | 0.225 | 0.388        | 0.308        | 0.464        | 0.486        | 0.550 | <b>0.358</b> |
| LC-OTPSS      | 0.158        | 0.150        | 0.572        | 0.572        | 0.299 | 0.501        | 0.463        | 0.387        | 0.503        | 0.461        | 0.385        | 0.503        | 0.237 | 0.480 | 0.290 | 0.491        | 0.352        | 0.542        | 0.578        | 0.591 | <b>0.426</b> |
| LC-OVP86      | 0.161        | 0.162        | 0.464        | 0.460        | 0.227 | 0.220        | 0.151        | 0.161        | 0.210        | 0.162        | 0.162        | 0.210        | 0.359 | 0.342 | 0.285 | 0.196        | 0.379        | 0.396        | 0.486        | 0.518 | <b>0.286</b> |
| LC-OVWN       | 0.170        | 0.178        | 0.377        | 0.377        | 0.262 | 0.353        | 0.294        | 0.267        | 0.352        | 0.293        | 0.266        | 0.355        | 0.273 | 0.362 | 0.239 | 0.349        | 0.265        | 0.391        | 0.408        | 0.410 | <b>0.312</b> |
| LC-OVWN5      | 0.211        | 0.212        | 0.497        | 0.497        | 0.298 | 0.463        | 0.412        | 0.362        | 0.463        | 0.407        | 0.359        | 0.465        | 0.270 | 0.465 | 0.270 | 0.510        | 0.329        | 0.545        | 0.508        | 0.541 | <b>0.404</b> |
| LC-PBEB95     | <b>0.060</b> | <b>0.060</b> | <b>0.099</b> | <b>0.099</b> | 0.159 | <b>0.086</b> | <b>0.086</b> | <b>0.084</b> | <b>0.086</b> | <b>0.086</b> | <b>0.084</b> | <b>0.085</b> | 0.230 | 0.107 | 0.111 | <b>0.086</b> | <b>0.096</b> | <b>0.096</b> | <b>0.099</b> | 0.100 | <b>0.100</b> |
| LC-PBEBRC     | 0.119        | 0.124        | 0.360        | 0.360        | 0.265 | 0.319        | 0.251        | 0.223        | 0.328        | 0.248        | 0.221        | 0.332        | 0.305 | 0.312 | 0.234 | 0.269        | 0.240        | 0.375        | 0.357        | 0.434 | <b>0.284</b> |
| LC-PBEKCIS    | <b>0.075</b> | <b>0.082</b> | 0.183        | 0.183        | 0.224 | 0.197        | 0.134        | 0.113        | 0.195        | 0.133        | 0.112        | 0.188        | 0.282 | 0.154 | 0.178 | 0.127        | 0.137        | 0.181        | 0.180        | 0.205 | <b>0.163</b> |
| LC-PBELYP     | 0.348        | 0.348        | 0.302        | 0.302        | 0.406 | 0.309        | 0.321        | 0.318        | 0.311        | 0.322        | 0.320        | 0.304        | 0.499 | 0.320 | 0.362 | 0.307        | 0.318        | 0.301        | 0.303        | 0.301 | <b>0.331</b> |
| LC-PBEP86     | 0.175        | 0.176        | 0.461        | 0.461        | 0.241 | 0.222        | 0.160        | 0.172        | 0.214        | 0.161        | 0.174        | 0.215        | 0.366 | 0.325 | 0.297 | 0.213        | 0.393        | 0.421        | 0.468        | 0.495 | <b>0.290</b> |
| LC-PBEPBE     | 0.150        | 0.140        | 0.572        | 0.569        | 0.285 | 0.484        | 0.459        | 0.378        | 0.498        | 0.457        | 0.377        | 0.495        | 0.238 | 0.436 | 0.265 | 0.457        | 0.342        | 0.562        | 0.570        | 0.589 | <b>0.416</b> |
| LC-PBEPKZB    | 0.159        | 0.148        | 0.570        | 0.568        | 0.292 | 0.487        | 0.457        | 0.382        | 0.483        | 0.456        | 0.382        | 0.486        | 0.241 | 0.439 | 0.289 | 0.476        | 0.344        | 0.566        | 0.572        | 0.590 | <b>0.419</b> |
| LC-PBEPL      | 0.207        | 0.209        | 0.494        | 0.494        | 0.289 | 0.463        | 0.389        | 0.354        | 0.457        | 0.389        | 0.353        | 0.455        | 0.274 | 0.457 | 0.269 | 0.480        | 0.328        | 0.529        | 0.523        | 0.558 | <b>0.399</b> |
| LC-PBEPW91    | 0.127        | 0.119        | 0.545        | 0.544        | 0.258 | 0.472        | 0.393        | 0.311        | 0.471        | 0.392        | 0.319        | 0.485        | 0.237 | 0.420 | 0.253 | 0.402        | 0.330        | 0.535        | 0.554        | 0.580 | <b>0.387</b> |
| LC-PBERevTPSS | 0.102        | <b>0.098</b> | 0.498        | 0.494        | 0.232 | 0.434        | 0.321        | 0.251        | 0.434        | 0.301        | 0.237        | 0.435        | 0.237 | 0.392 | 0.227 | 0.389        | 0.307        | 0.463        | 0.506        | 0.546 | <b>0.345</b> |
| LC-PBETPSS    | 0.149        | 0.145        | 0.570        | 0.571        | 0.286 | 0.485        | 0.457        | 0.383        | 0.483        | 0.458        | 0.382        | 0.487        | 0.241 | 0.440 | 0.288 | 0.485        | 0.344        | 0.565        | 0.572        | 0.595 | <b>0.419</b> |
| LC-PBEVP86    | 0.172        | 0.174        | 0.474        | 0.474        | 0.238 | 0.200        | 0.160        | 0.167        | 0.203        | 0.161        | 0.169        | 0.199        | 0.332 | 0.326 | 0.296 | 0.207        | 0.389        | 0.420        | 0.465        | 0.493 | <b>0.286</b> |
| LC-PBEVWN     | 0.169        | 0.176        | 0.383        | 0.383        | 0.263 | 0.353        | 0.294        | 0.268        | 0.353        | 0.293        | 0.268        | 0.355        | 0.276 | 0.356 | 0.239 | 0.337        | 0.267        | 0.395        | 0.383        | 0.413 | <b>0.311</b> |
| LC-PBEVWN5    | 0.209        | 0.211        | 0.508        | 0.508        | 0.298 | 0.471        | 0.408        | 0.364        | 0.470        | 0.407        | 0.363        | 0.466        | 0.274 | 0.460 | 0.271 | 0.504        | 0.331        | 0.550        | 0.529        | 0.598 | <b>0.410</b> |
| LC-PBEhB95    | <b>0.060</b> | <b>0.060</b> | <b>0.099</b> | <b>0.099</b> | 0.159 | <b>0.086</b> | <b>0.086</b> | <b>0.085</b> | <b>0.086</b> | <b>0.086</b> | <b>0.085</b> | <b>0.085</b> | 0.230 | 0.107 | 0.111 | <b>0.086</b> | <b>0.096</b> | <b>0.096</b> | <b>0.099</b> | 0.101 | <b>0.100</b> |
| LC-PBEhBRC    | 0.119        | 0.124        | 0.360        | 0.360        | 0.266 | 0.324        | 0.250        | 0.226        | 0.318        | 0.247        | 0.221        | 0.327        | 0.305 | 0.312 | 0     |              |              |              |              |       |              |

|                |              |              |              |              |       |              |              |              |              |              |              |              |       |       |       |              |              |              |              |       |              |
|----------------|--------------|--------------|--------------|--------------|-------|--------------|--------------|--------------|--------------|--------------|--------------|--------------|-------|-------|-------|--------------|--------------|--------------|--------------|-------|--------------|
| LC-PBEhPKZB    | 0.157        | 0.147        | 0.565        | 0.563        | 0.290 | 0.489        | 0.459        | 0.382        | 0.490        | 0.457        | 0.379        | 0.490        | 0.228 | 0.469 | 0.279 | 0.476        | 0.347        | 0.565        | 0.572        | 0.594 | <b>0.420</b> |
| LC-PBEhPL      | 0.207        | 0.208        | 0.505        | 0.505        | 0.294 | 0.478        | 0.397        | 0.360        | 0.478        | 0.393        | 0.357        | 0.456        | 0.274 | 0.458 | 0.269 | 0.477        | 0.328        | 0.532        | 0.523        | 0.547 | <b>0.402</b> |
| LC-PBEhPW91    | 0.127        | 0.120        | 0.535        | 0.536        | 0.258 | 0.476        | 0.415        | 0.325        | 0.479        | 0.385        | 0.334        | 0.478        | 0.237 | 0.420 | 0.249 | 0.402        | 0.330        | 0.534        | 0.548        | 0.582 | <b>0.389</b> |
| LC-PBEhRevTPS  | 0.101        | <b>0.098</b> | 0.518        | 0.519        | 0.232 | 0.438        | 0.301        | 0.238        | 0.436        | 0.305        | 0.248        | 0.438        | 0.237 | 0.373 | 0.228 | 0.380        | 0.303        | 0.466        | 0.509        | 0.552 | <b>0.346</b> |
| LC-PBEhTPSS    | 0.156        | 0.144        | 0.571        | 0.573        | 0.285 | 0.491        | 0.459        | 0.382        | 0.489        | 0.458        | 0.383        | 0.484        | 0.242 | 0.440 | 0.271 | 0.474        | 0.346        | 0.565        | 0.568        | 0.611 | <b>0.420</b> |
| LC-PBEhVP86    | 0.173        | 0.175        | 0.473        | 0.471        | 0.239 | 0.200        | 0.160        | 0.168        | 0.204        | 0.162        | 0.172        | 0.198        | 0.365 | 0.343 | 0.295 | 0.207        | 0.388        | 0.385        | 0.427        | 0.494 | <b>0.285</b> |
| LC-PBEhVWN     | 0.169        | 0.176        | 0.387        | 0.387        | 0.264 | 0.353        | 0.293        | 0.268        | 0.352        | 0.293        | 0.268        | 0.354        | 0.276 | 0.356 | 0.239 | 0.338        | 0.267        | 0.401        | 0.383        | 0.417 | <b>0.312</b> |
| LC-PBEhVWN5    | 0.210        | 0.211        | 0.510        | 0.510        | 0.298 | 0.489        | 0.413        | 0.368        | 0.488        | 0.405        | 0.365        | 0.467        | 0.274 | 0.460 | 0.271 | 0.502        | 0.332        | 0.551        | 0.530        | 0.563 | <b>0.411</b> |
| LC-PKZBB95     | <b>0.080</b> | <b>0.081</b> | <b>0.098</b> | <b>0.098</b> | 0.157 | <b>0.085</b> | <b>0.085</b> | <b>0.084</b> | <b>0.085</b> | <b>0.085</b> | <b>0.084</b> | <b>0.085</b> | 0.227 | 0.105 | 0.110 | <b>0.085</b> | <b>0.095</b> | <b>0.096</b> | <b>0.099</b> | 0.100 | <b>0.101</b> |
| LC-PKZBBRC     | 0.125        | 0.129        | 0.371        | 0.371        | 0.268 | 0.355        | 0.288        | 0.239        | 0.354        | 0.276        | 0.238        | 0.356        | 0.300 | 0.331 | 0.237 | 0.288        | 0.246        | 0.387        | 0.372        | 0.443 | <b>0.299</b> |
| LC-PKZBKIS     | <b>0.081</b> | <b>0.088</b> | 0.194        | 0.194        | 0.224 | 0.211        | 0.146        | 0.128        | 0.210        | 0.145        | 0.127        | 0.215        | 0.276 | 0.203 | 0.181 | 0.157        | 0.150        | 0.196        | 0.193        | 0.234 | <b>0.178</b> |
| LC-PKZBLYP     | 0.334        | 0.334        | 0.289        | 0.289        | 0.395 | 0.297        | 0.305        | 0.306        | 0.298        | 0.307        | 0.308        | 0.292        | 0.489 | 0.308 | 0.352 | 0.293        | 0.307        | 0.289        | 0.290        | 0.288 | <b>0.318</b> |
| LC-PKZBP86     | 0.157        | 0.159        | 0.457        | 0.455        | 0.226 | 0.221        | 0.150        | 0.157        | 0.220        | 0.151        | 0.159        | 0.235        | 0.355 | 0.337 | 0.276 | 0.191        | 0.377        | 0.394        | 0.447        | 0.482 | <b>0.280</b> |
| LC-PKZBPBE     | 0.159        | 0.151        | 0.561        | 0.562        | 0.305 | 0.492        | 0.464        | 0.388        | 0.488        | 0.464        | 0.389        | 0.498        | 0.234 | 0.452 | 0.272 | 0.491        | 0.348        | 0.566        | 0.580        | 0.601 | <b>0.423</b> |
| LC-PKZBPKZB    | 0.170        | 0.166        | 0.562        | 0.564        | 0.304 | 0.496        | 0.465        | 0.395        | 0.492        | 0.464        | 0.395        | 0.498        | 0.222 | 0.481 | 0.294 | 0.494        | 0.352        | 0.568        | 0.582        | 0.599 | <b>0.428</b> |
| LC-PKZBPL      | 0.214        | 0.215        | 0.510        | 0.510        | 0.301 | 0.475        | 0.422        | 0.377        | 0.474        | 0.426        | 0.377        | 0.471        | 0.270 | 0.469 | 0.270 | 0.497        | 0.339        | 0.538        | 0.529        | 0.567 | <b>0.413</b> |
| LC-PKZBPW91    | 0.138        | 0.131        | 0.556        | 0.557        | 0.278 | 0.492        | 0.451        | 0.371        | 0.478        | 0.443        | 0.368        | 0.490        | 0.233 | 0.425 | 0.252 | 0.479        | 0.336        | 0.561        | 0.569        | 0.592 | <b>0.410</b> |
| LC-PKZBRevTPS  | 0.110        | 0.107        | 0.519        | 0.518        | 0.233 | 0.452        | 0.388        | 0.281        | 0.450        | 0.359        | 0.277        | 0.449        | 0.231 | 0.413 | 0.229 | 0.390        | 0.312        | 0.495        | 0.531        | 0.549 | <b>0.365</b> |
| LC-PKZBTPSS    | 0.173        | 0.170        | 0.580        | 0.566        | 0.303 | 0.501        | 0.466        | 0.394        | 0.498        | 0.465        | 0.394        | 0.532        | 0.222 | 0.483 | 0.290 | 0.494        | 0.350        | 0.566        | 0.574        | 0.630 | <b>0.433</b> |
| LC-PKZBVP86    | 0.155        | 0.156        | 0.465        | 0.464        | 0.222 | 0.215        | 0.159        | 0.150        | 0.218        | 0.159        | 0.177        | 0.215        | 0.354 | 0.361 | 0.281 | 0.189        | 0.373        | 0.390        | 0.455        | 0.484 | <b>0.282</b> |
| LC-PKZBVWN     | 0.176        | 0.184        | 0.421        | 0.421        | 0.265 | 0.376        | 0.311        | 0.278        | 0.374        | 0.309        | 0.278        | 0.374        | 0.272 | 0.371 | 0.243 | 0.361        | 0.270        | 0.408        | 0.409        | 0.421 | <b>0.326</b> |
| LC-PKZBVWN5    | 0.218        | 0.218        | 0.529        | 0.530        | 0.302 | 0.484        | 0.430        | 0.379        | 0.478        | 0.430        | 0.379        | 0.482        | 0.270 | 0.474 | 0.272 | 0.504        | 0.346        | 0.556        | 0.534        | 0.566 | <b>0.419</b> |
| LC-PW91B95     | <b>0.060</b> | <b>0.060</b> | <b>0.099</b> | <b>0.099</b> | 0.158 | <b>0.086</b> | <b>0.086</b> | <b>0.085</b> | <b>0.086</b> | <b>0.086</b> | <b>0.085</b> | <b>0.085</b> | 0.230 | 0.107 | 0.111 | <b>0.086</b> | <b>0.096</b> | <b>0.097</b> | <b>0.099</b> | 0.101 | <b>0.100</b> |
| LC-PW91BRC     | 0.119        | 0.123        | 0.359        | 0.359        | 0.265 | 0.317        | 0.246        | 0.221        | 0.316        | 0.247        | 0.219        | 0.319        | 0.305 | 0.308 | 0.233 | 0.269        | 0.240        | 0.375        | 0.357        | 0.434 | <b>0.282</b> |
| LC-PW91KCIS    | <b>0.077</b> | <b>0.083</b> | 0.183        | 0.183        | 0.224 | 0.195        | 0.131        | 0.112        | 0.194        | 0.131        | 0.110        | 0.187        | 0.282 | 0.154 | 0.177 | 0.124        | 0.136        | 0.181        | 0.179        | 0.202 | <b>0.162</b> |
| LC-PW91LYP     | 0.349        | 0.349        | 0.304        | 0.304        | 0.407 | 0.311        | 0.322        | 0.320        | 0.312        | 0.324        | 0.322        | 0.305        | 0.500 | 0.321 | 0.363 | 0.309        | 0.319        | 0.302        | 0.304        | 0.303 | <b>0.333</b> |
| LC-PW91P86     | 0.174        | 0.177        | 0.463        | 0.464        | 0.239 | 0.214        | 0.160        | 0.176        | 0.208        | 0.162        | 0.176        | 0.206        | 0.366 | 0.328 | 0.298 | 0.213        | 0.392        | 0.421        | 0.467        | 0.492 | <b>0.290</b> |
| LC-PW91PBE     | 0.154        | 0.141        | 0.569        | 0.569        | 0.284 | 0.494        | 0.456        | 0.374        | 0.482        | 0.456        | 0.372        | 0.496        | 0.238 | 0.459 | 0.250 | 0.451        | 0.344        | 0.563        | 0.570        | 0.588 | <b>0.416</b> |
| LC-PW91PKZB    | 0.151        | 0.146        | 0.570        | 0.570        | 0.290 | 0.488        | 0.457        | 0.379        | 0.481        | 0.457        | 0.375        | 0.483        | 0.241 | 0.445 | 0.272 | 0.474        | 0.347        | 0.565        | 0.571        | 0.607 | <b>0.419</b> |
| LC-PW91PL      | 0.207        | 0.208        | 0.494        | 0.494        | 0.292 | 0.455        | 0.387        | 0.352        | 0.455        | 0.387        | 0.349        | 0.454        | 0.274 | 0.456 | 0.268 | 0.478        | 0.328        | 0.513        | 0.505        | 0.556 | <b>0.396</b> |
| LC-PW91PW91    | 0.126        | 0.121        | 0.544        | 0.543        | 0.257 | 0.483        | 0.390        | 0.338        | 0.469        | 0.359        | 0.311        | 0.485        | 0.238 | 0.419 | 0.256 | 0.400        | 0.330        | 0.536        | 0.557        | 0.580 | <b>0.387</b> |
| LC-PW91RevTPS  | 0.101        | <b>0.098</b> | 0.517        | 0.510        | 0.230 | 0.434        | 0.302        | 0.239        | 0.466        | 0.307        | 0.237        | 0.434        | 0.237 | 0.394 | 0.225 | 0.349        | 0.307        | 0.464        | 0.511        | 0.542 | <b>0.345</b> |
| LC-PW91TPSS    | 0.146        | 0.145        | 0.570        | 0.571        | 0.284 | 0.490        | 0.459        | 0.379        | 0.479        | 0.457        | 0.379        | 0.489        | 0.241 | 0.440 | 0.262 | 0.489        | 0.344        | 0.563        | 0.572        | 0.606 | <b>0.418</b> |
| LC-PW91VP86    | 0.173        | 0.174        | 0.467        | 0.467        | 0.237 | 0.200        | 0.161        | 0.170        | 0.203        | 0.163        | 0.173        | 0.200        | 0.365 | 0.334 | 0.295 | 0.207        | 0.388        | 0.419        | 0.466        | 0.491 | <b>0.288</b> |
| LC-PW91VWN     | 0.168        | 0.176        | 0.382        | 0.382        | 0.262 | 0.352        | 0.293        | 0.266        | 0.351        | 0.292        | 0.266        | 0.353        | 0.276 | 0.355 | 0.237 | 0.334        | 0.267        | 0.393        | 0.380        | 0.411 | <b>0.310</b> |
| LC-PW91VWN5    | 0.210        | 0.210        | 0.507        | 0.507        | 0.296 | 0.469        | 0.400        | 0.358        | 0.467        | 0.399        | 0.358        | 0.463        | 0.274 | 0.459 | 0.270 | 0.496        | 0.330        | 0.549        | 0.525        | 0.576 | <b>0.406</b> |
| LC-RevTPSSB95  | <b>0.081</b> | <b>0.081</b> | <b>0.099</b> | <b>0.099</b> | 0.156 | <b>0.086</b> | <b>0.086</b> | <b>0.085</b> | <b>0.086</b> | <b>0.086</b> | <b>0.085</b> | <b>0.085</b> | 0.225 | 0.107 | 0.110 | <b>0.086</b> | <b>0.082</b> | <b>0.097</b> | 0.100        | 0.101 | <b>0.101</b> |
| LC-RevTPSSBRC  | 0.124        | 0.129        | 0.390        | 0.390        | 0.269 | 0.343        | 0.252        | 0.226        | 0.342        | 0.251        | 0.225        | 0.344        | 0.299 | 0.306 | 0.237 | 0.282        | 0.249        | 0.384        | 0.387        | 0.434 | <b>0.293</b> |
| LC-RevTPSSKCI  | <b>0.080</b> | <b>0.087</b> | 0.193        | 0.193        | 0.222 | 0.204        | 0.140        | 0.120        | 0.202        | 0.139        | 0.119        | 0.192        | 0.273 | 0.198 | 0.179 | 0.152        | 0.152        | 0.193        | 0.191        | 0.232 | <b>0.173</b> |
| LC-RevTPSSLYP  | 0.341        | 0.342        | 0.300        | 0.300        | 0.401 | 0.308        | 0.318        | 0.317        | 0.310        | 0.320        | 0.318        | 0.303        | 0.492 | 0.320 | 0.358 | 0.304        | 0.314        | 0.298        | 0.300        | 0.298 | <b>0.328</b> |
| LC-RevTPSSP86  | 0.159        | 0.157        | 0.463        | 0.461        | 0.222 | 0.204        | 0.151        | 0.158        | 0.206        | 0.158        | 0.160        | 0.212        | 0.355 | 0.342 | 0.282 | 0.225        | 0.374        | 0.358        | 0.463        | 0.496 | <b>0.280</b> |
| LC-RevTPSSPBE  | 0.169        | 0.159        | 0.544        | 0.544        | 0.305 | 0.531        | 0.459        | 0.380        | 0.512        | 0.457        | 0.374        | 0.514        | 0.219 | 0.427 | 0.273 | 0.480        | 0.377        | 0.566        | 0.576        | 0.572 | <b>0.422</b> |
| LC-RevTPSSPKZ  | 0.188        | 0.185        | 0.547        | 0.546        | 0.304 | 0.518        | 0.462        | 0.384        | 0.517        | 0.461        | 0.380        | 0.540        | 0.220 | 0.439 | 0.276 | 0.498        | 0.378        | 0.565        | 0.578        | 0.573 | <b>0.428</b> |
| LC-RevTPSSPL   | 0.218        | 0.219        | 0.499        | 0.499        | 0.303 | 0.459        | 0.397        | 0.358        | 0.458        | 0.394        | 0.358        | 0.461        | 0.265 | 0.465 | 0.267 | 0.490        | 0.345        | 0.510        | 0.520        | 0.546 | <b>0.402</b> |
| LC-RevTPSSPW9  | 0.147        | 0.147        | 0.564        | 0.563        | 0.284 | 0.476        | 0.393        | 0.342        | 0.476        | 0.385        | 0.320        | 0.476        | 0.230 | 0.425 | 0.255 | 0.430        | 0.342        | 0.542        | 0.570        | 0.587 | <b>0.398</b> |
| LC-RevTPSSRev  | 0.115        | 0.112        | 0.492        | 0.493        | 0.248 | 0.444        | 0.317        | 0.255        | 0.417        | 0.317        | 0.254        | 0.446        | 0.229 | 0.391 | 0.231 | 0.391        | 0.315        | 0.494        | 0.521        | 0.549 | <b>0.352</b> |
| LC-RevTPSSSTPS | 0.176        | 0.178        | 0.545        | 0.544        | 0.304 | 0.515        | 0.460        | 0.383        | 0.515        | 0.460        | 0.382        | 0.544        | 0.220 | 0.441 | 0.272 | 0.481        | 0.376        | 0.568        | 0.579        | 0.570 | <b>0.426</b> |
| LC-RevTPSSVP8  | 0.155        | 0.154        | 0.415        | 0.456        | 0.220 | 0.230        | 0.145        | 0.157        | 0.225        | 0.147        | 0.158        | 0.219        | 0.354 | 0.421 | 0.281 | 0.222        | 0.372        | 0.357        | 0.460        | 0.492 | <b>0.282</b> |
| LC-RevTPSSVW   | 0.179        | 0.187        | 0.394        | 0.394        | 0.266 | 0.363        | 0.295        | 0.268        | 0.362        | 0.294        | 0.267        | 0.365        | 0.269 | 0.375 | 0.239 | 0.356        | 0.270        | 0.410        | 0.396        | 0.420 | <b>0.318</b> |
| LC-RevTPSSVW   | 0.221        | 0.222        | 0.503        | 0.503        | 0.304 | 0.463        | 0.408        | 0.368        | 0.462        | 0.408        | 0.368        | 0.464        | 0.263 | 0.473 | 0.270 | 0.495        | 0.349        | 0.526        | 0.525        | 0.538 | <b>0.407</b> |
| LC-SB95        | <b>0.070</b> | <b>0.060</b> | <b>0.099</b> | <b>0.099</b> | 0.182 | <b>0.085</b> | <b>0.085</b> | <b>0.084</b> | <b>0.085</b> | <b>0.085</b> | <b>0.084</b> | <b>0.085</b> | 0.233 | 0.107 | 0.111 | <b>0.085</b> | <b>0.096</b> | <b>0.096</b> | <b>0.099</b> | 0.100 | <b>0.101</b> |
| LC-SBRC        | 0.117        | 0.121        | 0.379        | 0.379        | 0.262 | 0.343        | 0.252        | 0.227        | 0.338        | 0.248        | 0.226        | 0.363        | 0.304 | 0.314 | 0.232 | 0.261        | 0.241        | 0.381        | 0.372        | 0.439 | <b>0.290</b> |
| LC-SKCIS       | <b>0.073</b> | <b>0.083</b> | 0.189        | 0.189        | 0.222 | 0.200        |              |              |              |              |              |              |       |       |       |              |              |              |              |       |              |

|               |              |              |              |              |       |              |              |              |              |              |              |              |       |              |       |              |              |              |       |              |              |
|---------------|--------------|--------------|--------------|--------------|-------|--------------|--------------|--------------|--------------|--------------|--------------|--------------|-------|--------------|-------|--------------|--------------|--------------|-------|--------------|--------------|
| LC-SPL        | 0.206        | 0.208        | 0.507        | 0.507        | 0.292 | 0.482        | 0.406        | 0.354        | 0.477        | 0.404        | 0.350        | 0.488        | 0.273 | 0.452        | 0.264 | 0.446        | 0.331        | 0.526        | 0.522 | 0.543        | <b>0.402</b> |
| LC-SPW91      | 0.123        | 0.117        | 0.571        | 0.571        | 0.244 | 0.475        | 0.408        | 0.311        | 0.472        | 0.389        | 0.310        | 0.474        | 0.234 | 0.415        | 0.227 | 0.412        | 0.331        | 0.571        | 0.550 | 0.580        | <b>0.389</b> |
| LC-SRevTPSS   | <b>0.095</b> | <b>0.092</b> | 0.483        | 0.483        | 0.226 | 0.474        | 0.307        | 0.236        | 0.471        | 0.300        | 0.278        | 0.456        | 0.234 | 0.359        | 0.216 | 0.313        | 0.305        | 0.467        | 0.475 | 0.552        | <b>0.341</b> |
| LC-STPSS      | 0.144        | 0.140        | 0.581        | 0.581        | 0.283 | 0.480        | 0.458        | 0.374        | 0.479        | 0.459        | 0.371        | 0.487        | 0.240 | 0.421        | 0.268 | 0.463        | 0.344        | 0.556        | 0.562 | 0.582        | <b>0.414</b> |
| LC-SVP86      | 0.176        | 0.177        | 0.475        | 0.475        | 0.240 | 0.205        | 0.163        | 0.205        | 0.210        | 0.164        | 0.213        | 0.206        | 0.332 | 0.328        | 0.307 | 0.218        | 0.270        | 0.397        | 0.467 | 0.512        | <b>0.287</b> |
| LC-SVWN5      | 0.208        | 0.210        | 0.524        | 0.524        | 0.295 | 0.484        | 0.412        | 0.357        | 0.482        | 0.409        | 0.356        | 0.491        | 0.272 | 0.455        | 0.265 | 0.451        | 0.345        | 0.546        | 0.526 | 0.586        | <b>0.410</b> |
| LC-TPSSB95    | <b>0.081</b> | <b>0.081</b> | <b>0.099</b> | <b>0.099</b> | 0.157 | <b>0.086</b> | <b>0.086</b> | <b>0.085</b> | <b>0.086</b> | <b>0.086</b> | <b>0.085</b> | <b>0.086</b> | 0.209 | 0.107        | 0.111 | <b>0.086</b> | <b>0.097</b> | <b>0.097</b> | 0.100 | 0.101        | <b>0.101</b> |
| LC-TPSSBRC    | 0.123        | 0.128        | 0.390        | 0.390        | 0.267 | 0.318        | 0.246        | 0.222        | 0.327        | 0.245        | 0.221        | 0.329        | 0.301 | 0.305        | 0.236 | 0.275        | 0.246        | 0.383        | 0.372 | 0.433        | <b>0.288</b> |
| LC-TPSSKCIS   | <b>0.080</b> | <b>0.086</b> | 0.190        | 0.190        | 0.222 | 0.198        | 0.135        | 0.114        | 0.196        | 0.134        | 0.113        | 0.187        | 0.275 | 0.195        | 0.178 | 0.146        | 0.150        | 0.186        | 0.187 | 0.213        | <b>0.169</b> |
| LC-TPSSLYP    | 0.346        | 0.346        | 0.304        | 0.304        | 0.405 | 0.312        | 0.323        | 0.320        | 0.313        | 0.324        | 0.322        | 0.307        | 0.496 | 0.323        | 0.361 | 0.308        | 0.318        | 0.302        | 0.305 | 0.303        | <b>0.332</b> |
| LC-TPSSP86    | 0.164        | 0.163        | 0.466        | 0.463        | 0.227 | 0.202        | 0.158        | 0.165        | 0.201        | 0.174        | 0.167        | 0.192        | 0.358 | 0.334        | 0.286 | 0.207        | 0.378        | 0.399        | 0.469 | 0.492        | <b>0.283</b> |
| LC-TPSSPBE    | 0.165        | 0.158        | 0.542        | 0.541        | 0.291 | 0.484        | 0.454        | 0.373        | 0.484        | 0.452        | 0.370        | 0.510        | 0.233 | 0.421        | 0.268 | 0.480        | 0.352        | 0.532        | 0.575 | 0.597        | <b>0.414</b> |
| LC-TPSSPKZB   | 0.170        | 0.167        | 0.544        | 0.544        | 0.303 | 0.486        | 0.458        | 0.378        | 0.508        | 0.457        | 0.375        | 0.481        | 0.222 | 0.427        | 0.272 | 0.485        | 0.376        | 0.532        | 0.577 | 0.595        | <b>0.418</b> |
| LC-TPSSPL     | 0.215        | 0.217        | 0.496        | 0.496        | 0.301 | 0.457        | 0.392        | 0.353        | 0.457        | 0.389        | 0.350        | 0.459        | 0.269 | 0.464        | 0.267 | 0.485        | 0.331        | 0.507        | 0.498 | 0.532        | <b>0.397</b> |
| LC-TPSSPW91   | 0.148        | 0.131        | 0.564        | 0.563        | 0.281 | 0.474        | 0.374        | 0.329        | 0.481        | 0.379        | 0.327        | 0.475        | 0.232 | 0.404        | 0.255 | 0.421        | 0.339        | 0.523        | 0.568 | 0.585        | <b>0.393</b> |
| LC-TPSSRevTPS | 0.112        | 0.109        | 0.488        | 0.486        | 0.235 | 0.448        | 0.304        | 0.242        | 0.474        | 0.304        | 0.218        | 0.444        | 0.231 | 0.382        | 0.229 | 0.391        | 0.312        | 0.498        | 0.516 | 0.549        | <b>0.349</b> |
| LC-TPSSTPSS   | 0.163        | 0.159        | 0.542        | 0.542        | 0.292 | 0.487        | 0.459        | 0.378        | 0.505        | 0.458        | 0.375        | 0.506        | 0.221 | 0.429        | 0.272 | 0.475        | 0.376        | 0.531        | 0.576 | 0.570        | <b>0.416</b> |
| LC-TPSSVP86   | 0.163        | 0.161        | 0.457        | 0.457        | 0.225 | 0.207        | 0.149        | 0.160        | 0.206        | 0.150        | 0.163        | 0.211        | 0.357 | 0.335        | 0.286 | 0.205        | 0.376        | 0.397        | 0.462 | 0.498        | <b>0.281</b> |
| LC-TPSSVWN    | 0.176        | 0.185        | 0.385        | 0.385        | 0.264 | 0.351        | 0.292        | 0.263        | 0.350        | 0.291        | 0.262        | 0.357        | 0.271 | 0.369        | 0.236 | 0.344        | 0.268        | 0.399        | 0.386 | 0.415        | <b>0.312</b> |
| LC-TPSSVWN5   | 0.218        | 0.220        | 0.499        | 0.499        | 0.301 | 0.460        | 0.401        | 0.356        | 0.458        | 0.400        | 0.356        | 0.463        | 0.265 | 0.469        | 0.269 | 0.489        | 0.342        | 0.523        | 0.503 | 0.575        | <b>0.403</b> |
| LC-XaB95      | <b>0.071</b> | <b>0.071</b> | 0.100        | 0.100        | 0.174 | <b>0.086</b> | <b>0.086</b> | 0.104        | <b>0.086</b> | <b>0.086</b> | <b>0.085</b> | <b>0.086</b> | 0.234 | 0.108        | 0.111 | <b>0.086</b> | <b>0.098</b> | <b>0.098</b> | 0.101 | 0.102        | <b>0.104</b> |
| LC-XaBRC      | 0.116        | 0.120        | 0.368        | 0.368        | 0.260 | 0.310        | 0.235        | 0.216        | 0.307        | 0.233        | 0.215        | 0.313        | 0.305 | 0.294        | 0.229 | 0.256        | 0.238        | 0.382        | 0.368 | 0.432        | <b>0.278</b> |
| LC-XaKCIS     | <b>0.075</b> | <b>0.083</b> | 0.181        | 0.181        | 0.220 | 0.171        | 0.125        | 0.104        | 0.170        | 0.125        | 0.103        | 0.177        | 0.282 | 0.143        | 0.173 | 0.114        | 0.130        | 0.175        | 0.177 | 0.199        | <b>0.155</b> |
| LC-XaLYP      | 0.361        | 0.361        | 0.318        | 0.318        | 0.417 | 0.322        | 0.337        | 0.335        | 0.324        | 0.339        | 0.337        | 0.316        | 0.508 | 0.336        | 0.374 | 0.324        | 0.333        | 0.318        | 0.319 | 0.319        | <b>0.346</b> |
| LC-XaP86      | 0.182        | 0.184        | 0.479        | 0.479        | 0.248 | 0.208        | 0.167        | 0.214        | 0.208        | 0.186        | 0.223        | 0.199        | 0.373 | 0.358        | 0.304 | 0.225        | 0.390        | 0.410        | 0.450 | 0.494        | <b>0.299</b> |
| LC-XaPBE      | 0.141        | 0.137        | 0.567        | 0.568        | 0.281 | 0.480        | 0.404        | 0.339        | 0.500        | 0.401        | 0.340        | 0.478        | 0.237 | 0.415        | 0.248 | 0.455        | 0.344        | 0.560        | 0.553 | 0.585        | <b>0.402</b> |
| LC-XaPKZB     | 0.146        | 0.142        | 0.569        | 0.569        | 0.282 | 0.478        | 0.455        | 0.345        | 0.478        | 0.440        | 0.345        | 0.478        | 0.240 | 0.422        | 0.267 | 0.460        | 0.346        | 0.563        | 0.554 | 0.587        | <b>0.408</b> |
| LC-XaPL       | 0.204        | 0.206        | 0.489        | 0.489        | 0.281 | 0.464        | 0.381        | 0.335        | 0.463        | 0.380        | 0.334        | 0.461        | 0.273 | 0.445        | 0.264 | 0.439        | 0.328        | 0.501        | 0.497 | 0.518        | <b>0.387</b> |
| LC-XaPW91     | 0.124        | 0.120        | 0.546        | 0.543        | 0.241 | 0.471        | 0.342        | 0.319        | 0.471        | 0.354        | 0.289        | 0.471        | 0.236 | 0.430        | 0.221 | 0.371        | 0.336        | 0.533        | 0.526 | 0.579        | <b>0.376</b> |
| LC-XaRevTPSS  | <b>0.097</b> | <b>0.094</b> | 0.473        | 0.472        | 0.225 | 0.439        | 0.349        | 0.285        | 0.459        | 0.314        | 0.229        | 0.445        | 0.234 | 0.393        | 0.215 | 0.309        | 0.308        | 0.470        | 0.467 | 0.549        | <b>0.341</b> |
| LC-XaTPSS     | 0.145        | 0.141        | 0.571        | 0.571        | 0.283 | 0.481        | 0.455        | 0.353        | 0.479        | 0.456        | 0.354        | 0.481        | 0.241 | 0.426        | 0.274 | 0.460        | 0.345        | 0.562        | 0.549 | 0.587        | <b>0.411</b> |
| BB1K          | 0.176        | 0.176        | 0.179        | 0.179        | 0.149 | 0.237        | 0.235        | 0.234        | 0.317        | 0.235        | 0.234        | 0.237        | 0.149 | 0.436        | 0.175 | 0.239        | 0.179        | 0.180        | 0.180 | 0.180        | <b>0.215</b> |
| mPW1K         | 0.388        | 0.379        | 0.521        | 0.521        | 0.339 | 0.494        | 0.441        | 0.386        | 0.493        | 0.440        | 0.385        | 0.490        | 0.274 | 0.418        | 0.332 | 0.533        | 0.450        | 0.549        | 0.532 | 0.540        | <b>0.445</b> |
| mPW1B95       | 0.108        | 0.108        | 0.128        | 0.128        | 0.163 | 0.131        | 0.115        | 0.114        | 0.131        | 0.115        | 0.114        | 0.131        | 0.149 | 0.136        | 0.129 | 0.118        | 0.126        | 0.145        | 0.128 | 0.129        | <b>0.127</b> |
| mPWB1K        | 0.113        | 0.113        | 0.108        | 0.108        | 0.143 | <b>0.094</b> | <b>0.097</b> | <b>0.095</b> | <b>0.094</b> | <b>0.097</b> | <b>0.095</b> | 0.118        | 0.133 | <b>0.094</b> | 0.110 | 0.105        | 0.106        | 0.108        | 0.108 | 0.109        | <b>0.107</b> |
| mPW1KCIS      | 0.257        | 0.260        | 0.401        | 0.401        | 0.293 | 0.373        | 0.347        | 0.326        | 0.373        | 0.346        | 0.326        | 0.377        | 0.257 | 0.360        | 0.235 | 0.412        | 0.301        | 0.424        | 0.398 | 0.419        | <b>0.344</b> |
| mPWKCIS1K     | 0.244        | 0.246        | 0.367        | 0.367        | 0.262 | 0.320        | 0.282        | 0.261        | 0.318        | 0.281        | 0.260        | 0.324        | 0.232 | 0.313        | 0.226 | 0.357        | 0.293        | 0.386        | 0.367 | 0.374        | <b>0.304</b> |
| TPSS1KCIS     | 0.177        | 0.180        | 0.211        | 0.211        | 0.253 | 0.207        | 0.193        | 0.178        | 0.207        | 0.193        | 0.177        | 0.213        | 0.267 | 0.209        | 0.187 | 0.230        | 0.193        | 0.226        | 0.211 | 0.210        | <b>0.207</b> |
| PBE1KCIS      | 0.151        | 0.154        | 0.117        | 0.117        | 0.250 | 0.119        | 0.116        | 0.122        | 0.118        | 0.116        | 0.122        | 0.127        | 0.296 | 0.108        | 0.199 | 0.116        | 0.133        | 0.117        | 0.119 | 0.117        | <b>0.142</b> |
| mPWLYP1M      | 0.249        | 0.251        | 0.212        | 0.212        | 0.349 | 0.225        | 0.228        | 0.230        | 0.226        | 0.228        | 0.230        | 0.230        | 0.379 | 0.218        | 0.297 | 0.214        | 0.246        | 0.207        | 0.215 | 0.210        | <b>0.243</b> |
| PBE1W         | 0.156        | 0.160        | 0.156        | 0.155        | 0.266 | 0.153        | 0.142        | 0.135        | 0.152        | 0.141        | 0.133        | 0.162        | 0.306 | 0.148        | 0.212 | 0.161        | 0.156        | 0.161        | 0.155 | 0.155        | <b>0.168</b> |
| mPWLYP1W      | 0.230        | 0.232        | 0.201        | 0.201        | 0.346 | 0.197        | 0.203        | 0.210        | 0.197        | 0.204        | 0.210        | 0.213        | 0.370 | 0.188        | 0.284 | 0.210        | 0.230        | 0.209        | 0.203 | 0.204        | <b>0.227</b> |
| PBELYP1W      | 0.247        | 0.249        | 0.217        | 0.217        | 0.325 | 0.217        | 0.221        | 0.224        | 0.217        | 0.221        | 0.224        | 0.222        | 0.368 | 0.222        | 0.284 | 0.212        | 0.243        | 0.216        | 0.220 | 0.218        | <b>0.239</b> |
| TPSSLYP1W     | 0.240        | 0.241        | 0.210        | 0.210        | 0.330 | 0.219        | 0.223        | 0.225        | 0.219        | 0.222        | 0.225        | 0.225        | 0.371 | 0.220        | 0.289 | 0.211        | 0.239        | 0.206        | 0.215 | 0.211        | <b>0.238</b> |
| mPW3LYP       | 0.235        | 0.236        | 0.205        | 0.205        | 0.326 | 0.220        | 0.223        | 0.226        | 0.220        | 0.224        | 0.226        | 0.224        | 0.363 | 0.213        | 0.279 | 0.206        | 0.232        | 0.204        | 0.208 | 0.204        | <b>0.234</b> |
| PBEPBE-D2     | 0.208        | 0.211        | 0.158        | 0.158        | 0.261 | 0.147        | 0.167        | 0.169        | 0.148        | 0.169        | 0.171        | 0.147        | 0.342 | 0.150        | 0.229 | 0.157        | 0.182        | 0.161        | 0.160 | 0.158        | <b>0.183</b> |
| BLYP-D2       | 0.211        | 0.102        | 0.317        | 0.317        | 0.186 | 0.405        | 0.392        | 0.396        | 0.406        | 0.429        | 0.396        | 0.413        | 0.268 | 0.321        | 0.297 | 0.405        | 0.299        | 0.402        | 0.319 | 0.402        | <b>0.334</b> |
| B3LYP-D2      | 0.170        | 0.175        | <b>0.097</b> | <b>0.097</b> | 0.226 | <b>0.093</b> | 0.112        | 0.110        | <b>0.094</b> | 0.114        | 0.111        | <b>0.097</b> | 0.323 | <b>0.097</b> | 0.171 | <b>0.091</b> | 0.117        | 0.100        | 0.100 | <b>0.097</b> | <b>0.130</b> |
| BP86-D2       | 0.988        | 0.990        | 1.385        | 1.414        | 0.646 | 1.149        | 1.105        | 1.033        | 1.145        | 1.096        | 1.026        | 1.283        | 0.482 | 1.201        | 0.691 | 1.295        | 1.036        | 1.316        | 1.288 | 1.403        | <b>1.099</b> |
| TPSSTPSS-D2   | 0.142        | 0.144        | 0.101        | 0.102        | 0.216 | 0.111        | 0.118        | 0.122        | 0.111        | 0.118        | 0.122        | 0.118        | 0.259 | 0.105        | 0.173 | <b>0.092</b> | 0.144        | <b>0.098</b> | 0.117 | 0.104        | <b>0.131</b> |
| PBEPBE-D3     | 0.166        | 0.169        | 0.123        | 0.123        | 0.254 | 0.124        | 0.132        | 0.140        | 0.124        | 0.132        | 0.140        | 0.130        | 0.297 | 0.113        | 0.207 | 0.118        | 0.160        | 0.122        | 0.126 | 0.123        | <b>0.151</b> |
| BLYP-D3       | 0.102        | 0.125        | 0.193        | 0.191        | 0.214 | 0.383        | 0.228        | 0.260        | 0.383        | 0.297        | 0.268        | 0.392        | 0.294 | 0.221        | 0.143 | 0.260        | 0.114        | 0.211        | 0.197 | 0.220        | <b>0.235</b> |
| B3LYP-D3      | 0.106        | 0.111        | <b>0.066</b> | <b>0.064</b> | 0.209 | <b>0.068</b> | <b>0.080</b> | <b>0.087</b> | <b>0.069</b> | <b>0.080</b> | <b>0.087</b> | <b>0.076</b> | 0.300 | <b>0.068</b> | 0.154 | <b>0.043</b> | 0.107        | <b>0.06</b>  |       |              |              |

|                 |              |              |              |              |              |              |              |              |              |              |              |              |              |              |              |              |              |              |              |                 |              |
|-----------------|--------------|--------------|--------------|--------------|--------------|--------------|--------------|--------------|--------------|--------------|--------------|--------------|--------------|--------------|--------------|--------------|--------------|--------------|--------------|-----------------|--------------|
| B3PW91-D3       | 0.480        | 0.479        | 0.688        | 0.662        | 0.319        | 0.615        | 0.535        | 0.478        | 0.613        | 0.535        | 0.477        | 0.592        | 0.246        | 0.562        | 0.383        | 0.731        | 0.514        | 0.718        | 0.653        | 0.759           | <b>0.552</b> |
| BMK-D3          | 0.873        | 0.854        | 1.063        | 1.063        | 0.604        | 0.975        | 0.857        | 0.849        | 0.832        | 0.855        | 0.869        | 0.832        | 0.450        | 0.958        | 0.740        | 0.966        | 0.921        | 0.988        | 1.019        | 1.045           | <b>0.881</b> |
| CAM-B3LYP-D3    | 0.259        | 0.260        | 0.193        | 0.193        | 0.320        | 0.203        | 0.222        | 0.220        | 0.205        | 0.224        | 0.222        | 0.191        | 0.418        | 0.210        | 0.275        | 0.200        | 0.219        | 0.196        | 0.196        | 0.193           | <b>0.231</b> |
| LC-wPBE-D3      | <b>0.049</b> | <b>0.052</b> | 0.157        | 0.157        | 0.178        | 0.162        | 0.129        | 0.115        | 0.161        | 0.128        | 0.112        | 0.167        | 0.242        | 0.134        | 0.132        | 0.140        | <b>0.093</b> | 0.173        | 0.155        | 0.166           | <b>0.140</b> |
| M05-D3          | 0.235        | 0.235        | 0.216        | 0.216        | 0.318        | 0.233        | 0.235        | 0.231        | 0.234        | 0.237        | 0.232        | 0.231        | 0.404        | 0.280        | 0.273        | 0.207        | 0.221        | 0.195        | 0.205        | 0.199           | <b>0.242</b> |
| M052X-D3        | 0.155        | 0.155        | 0.148        | 0.148        | 0.245        | 0.172        | 0.177        | 0.178        | 0.172        | 0.177        | 0.178        | 0.167        | 0.284        | 0.140        | 0.202        | 0.152        | 0.149        | 0.145        | 0.147        | 0.144           | <b>0.172</b> |
| M06-D3          | <b>0.068</b> | <b>0.067</b> | 0.172        | 0.172        | <b>0.069</b> | 0.136        | <b>0.076</b> | <b>0.073</b> | 0.136        | <b>0.076</b> | <b>0.073</b> | 0.137        | <b>0.077</b> | <b>0.057</b> | <b>0.053</b> | 0.123        | 0.167        | 0.172        | 0.171        | 0.118           | <b>0.110</b> |
| M06L-D3         | 0.122        | 0.122        | 0.141        | 0.141        | 0.145        | 0.128        | 0.101        | <b>0.098</b> | 0.128        | 0.101        | <b>0.074</b> | 0.128        | 0.113        | <b>0.083</b> | 0.112        | <b>0.067</b> | 0.136        | 0.101        | 0.111        | 0.128           | <b>0.114</b> |
| M06HF-D3        | 0.140        | 0.140        | 0.146        | 0.146        | 0.168        | 0.148        | 0.148        | 0.151        | 0.148        | 0.148        | 0.151        | 0.148        | <b>0.056</b> | 0.116        | 0.148        | 0.147        | 0.146        | 0.211        | 0.145        | 0.139           | <b>0.145</b> |
| M062X-D3        | 0.126        | 0.127        | 0.149        | 0.149        | 0.238        | 0.145        | 0.135        | 0.149        | 0.144        | 0.144        | 0.149        | 0.147        | 0.254        | <b>0.041</b> | 0.168        | 0.119        | 0.155        | 0.157        | 0.148        | 0.155           | <b>0.150</b> |
| PBEPBE-D3BJ     | 0.150        | 0.153        | <b>0.097</b> | <b>0.097</b> | 0.237        | <b>0.098</b> | 0.110        | 0.118        | <b>0.098</b> | 0.111        | 0.119        | 0.104        | 0.292        | <b>0.091</b> | 0.188        | <b>0.090</b> | 0.140        | <b>0.095</b> | 0.104        | <b>0.097</b>    | <b>0.129</b> |
| BLYP-D3BJ       | 0.141        | 0.115        | 0.403        | 0.404        | 0.284        | 0.430        | 0.336        | 0.313        | 0.464        | 0.338        | 0.312        | 0.478        | 0.288        | 0.358        | 0.292        | 0.528        | 0.219        | 0.561        | 0.393        | 0.540           | <b>0.360</b> |
| B3LYP-D3BJ      | <b>0.052</b> | <b>0.062</b> | <b>0.082</b> | <b>0.083</b> | 0.170        | 0.165        | 0.151        | 0.150        | 0.165        | 0.166        | 0.154        | 0.172        | 0.256        | 0.131        | 0.110        | 0.151        | <b>0.079</b> | <b>0.077</b> | <b>0.073</b> | 0.164           | <b>0.131</b> |
| BP86-D3BJ       | 0.893        | 0.893        | 1.153        | 1.152        | 0.588        | 0.982        | 0.944        | 0.902        | 0.958        | 0.936        | 0.898        | 1.002        | 0.536        | 1.003        | 0.788        | 1.103        | 0.933        | 1.130        | 1.163        | 1.207           | <b>0.958</b> |
| TPSSTPSS-D3BJ   | 0.121        | 0.124        | 0.132        | 0.132        | 0.200        | 0.113        | 0.108        | <b>0.095</b> | 0.112        | 0.108        | <b>0.099</b> | 0.118        | 0.230        | 0.119        | 0.148        | 0.135        | 0.115        | 0.137        | 0.130        | 0.131           | <b>0.130</b> |
| PBE1PBE-D3BJ    | 0.112        | 0.115        | <b>0.087</b> | <b>0.087</b> | 0.206        | <b>0.084</b> | <b>0.088</b> | 0.102        | <b>0.084</b> | <b>0.088</b> | 0.102        | <b>0.091</b> | 0.246        | <b>0.074</b> | 0.158        | <b>0.082</b> | 0.104        | <b>0.090</b> | <b>0.086</b> | <b>0.087</b>    | <b>0.108</b> |
| BPBE-D3BJ       | 0.762        | 0.762        | 0.987        | 0.987        | 0.502        | 0.880        | 0.859        | 0.799        | 0.880        | 0.860        | 0.797        | 0.888        | 0.435        | 0.877        | 0.654        | 1.036        | 0.875        | 1.120        | 0.978        | 1.110           | <b>0.852</b> |
| B3PW91-D3BJ     | 0.543        | 0.541        | 0.788        | 0.788        | 0.345        | 0.610        | 0.609        | 0.564        | 0.639        | 0.609        | 0.563        | 0.646        | 0.297        | 0.666        | 0.452        | 0.799        | 0.568        | 0.828        | 0.815        | 0.868           | <b>0.627</b> |
| BMK-D3BJ        | 0.904        | 0.905        | 1.207        | 1.215        | 0.848        | 0.904        | 0.918        | 0.887        | 0.905        | 0.914        | 0.887        | 1.048        | 0.528        | 0.851        | 0.827        | 1.036        | 1.125        | 1.062        | 1.067        | 1.147           | <b>0.959</b> |
| CAM-B3LYP-D3B   | 0.186        | 0.188        | 0.132        | 0.132        | 0.275        | 0.148        | 0.159        | 0.162        | 0.148        | 0.160        | 0.163        | 0.150        | 0.367        | 0.143        | 0.226        | 0.136        | 0.165        | 0.133        | 0.135        | 0.130           | <b>0.172</b> |
| LC-wPBE-D3BJ    | <b>0.079</b> | <b>0.078</b> | 0.220        | 0.220        | 0.162        | 0.230        | 0.181        | 0.172        | 0.230        | 0.190        | 0.177        | 0.225        | 0.206        | 0.227        | 0.127        | 0.212        | 0.131        | 0.234        | 0.218        | 0.262           | <b>0.189</b> |
| B2PLYP          | 0.218        | 0.218        | 0.472        | 0.471        | 0.641        | 0.599        | 0.432        | 0.316        | 0.628        | 0.486        | 0.311        | 1.082        | 0.287        | 0.256        | 0.314        | 0.280        | 0.312        | 0.214        | 0.338        | 0.199           | <b>0.404</b> |
| B2PLYP(Full)    | 0.199        | 0.202        | 0.449        | 0.449        | 0.633        | 0.752        | 0.419        | 0.269        | 0.731        | 0.383        | 0.264        | 0.998        | 0.286        | 0.241        | 0.304        | 0.141        | 0.302        | 0.175        | 0.283        | 0.122           | <b>0.380</b> |
| B2PLYPD         | 0.108        | 0.118        | <b>0.065</b> | <b>0.065</b> | 0.200        | 0.115        | <b>0.097</b> | 0.103        | 0.101        | <b>0.095</b> | 0.103        | 0.174        | 0.271        | <b>0.086</b> | 0.139        | <b>0.089</b> | <b>0.083</b> | <b>0.099</b> | <b>0.069</b> | <b>0.095</b>    | <b>0.114</b> |
| B2PLYPD(Full)   | 0.109        | 0.118        | <b>0.065</b> | <b>0.065</b> | 0.200        | 0.115        | <b>0.096</b> | 0.108        | <b>0.098</b> | <b>0.096</b> | 0.107        | 0.174        | 0.270        | <b>0.085</b> | 0.138        | 0.112        | <b>0.084</b> | 0.105        | <b>0.074</b> | 0.116           | <b>0.117</b> |
| B2PLYP-D3       | <b>0.062</b> | <b>0.071</b> | <b>0.041</b> | <b>0.041</b> | 0.208        | 0.117        | 0.101        | 0.101        | 0.114        | <b>0.098</b> | <b>0.099</b> | 0.186        | 0.257        | <b>0.077</b> | 0.145        | <b>0.049</b> | <b>0.083</b> | <b>0.048</b> | <b>0.055</b> | <b>0.045</b>    | <b>0.100</b> |
| B2PLYP-D3(Full) | <b>0.061</b> | <b>0.071</b> | <b>0.037</b> | <b>0.032</b> | 0.207        | 0.120        | 0.102        | <b>0.082</b> | 0.117        | 0.101        | <b>0.085</b> | 0.185        | 0.255        | <b>0.076</b> | 0.131        | <b>0.074</b> | <b>0.079</b> | <b>0.055</b> | <b>0.042</b> | <b>0.068</b>    | <b>0.099</b> |
| B2PLYPD3        | <b>0.038</b> | <b>0.046</b> | <b>0.053</b> | <b>0.053</b> | 0.187        | 0.183        | <b>0.089</b> | <b>0.099</b> | 0.155        | <b>0.083</b> | <b>0.095</b> | 0.267        | 0.242        | <b>0.053</b> | 0.127        | <b>0.014</b> | <b>0.062</b> | <b>0.008</b> | <b>0.024</b> | <b>0.008</b>    | <b>0.094</b> |
| B2PLYPD3(Full)  | <b>0.037</b> | <b>0.045</b> | <b>0.040</b> | <b>0.038</b> | 0.186        | 0.179        | <b>0.086</b> | <b>0.085</b> | 0.154        | <b>0.080</b> | <b>0.083</b> | 0.265        | 0.241        | <b>0.051</b> | 0.113        | <b>0.020</b> | <b>0.046</b> | <b>0.007</b> | <b>0.012</b> | <b>0.010</b>    | <b>0.089</b> |
| mPW2PLYP        | 0.188        | 0.191        | 0.167        | 0.166        | 0.291        | 0.200        | 0.200        | 0.203        | 0.199        | 0.199        | 0.203        | 0.214        | 0.334        | 0.191        | 0.235        | 0.177        | 0.184        | 0.177        | 0.169        | 0.175           | <b>0.203</b> |
| mPW2PLYP(Full)  | 0.187        | 0.190        | 0.167        | 0.166        | 0.289        | 0.200        | 0.199        | 0.202        | 0.199        | 0.198        | 0.202        | 0.214        | 0.333        | 0.191        | 0.232        | 0.178        | 0.183        | 0.177        | 0.168        | 0.173           | <b>0.202</b> |
| mPW2PLYPD       | 0.221        | 0.224        | 0.202        | 0.202        | 0.278        | 0.210        | 0.215        | 0.225        | 0.210        | 0.224        | 0.230        | 0.214        | 0.345        | 0.214        | 0.246        | 0.227        | 0.219        | 0.233        | 0.218        | 0.232           | <b>0.230</b> |
| mPW2PLYPD(Full) | 0.226        | 0.229        | 0.204        | 0.206        | 0.278        | 0.210        | 0.220        | 0.227        | 0.211        | 0.229        | 0.236        | 0.214        | 0.347        | 0.218        | 0.251        | 0.241        | 0.222        | 0.239        | 0.223        | 0.242           | <b>0.234</b> |
| PBE0DH          | 0.122        | 0.127        | 0.161        | 0.161        | 0.213        | 0.149        | 0.128        | 0.112        | 0.145        | 0.126        | 0.106        | 0.208        | 0.232        | 0.137        | 0.138        | 0.118        | 0.129        | 0.134        | 0.146        | 0.131           | <b>0.146</b> |
| PBE0DH(Full)    | 0.117        | 0.123        | 0.156        | 0.155        | 0.211        | 0.148        | 0.124        | 0.104        | 0.142        | 0.121        | 0.100        | 0.207        | 0.231        | 0.134        | 0.134        | 0.100        | 0.127        | 0.127        | 0.139        | 0.117           | <b>0.141</b> |
| DSDPBEP86       | <b>0.018</b> | <b>0.029</b> | <b>0.037</b> | <b>0.035</b> | 0.139        | <b>0.052</b> | <b>0.036</b> | <b>0.058</b> | <b>0.048</b> | <b>0.038</b> | <b>0.060</b> | 0.179        | 0.182        | <b>0.041</b> | <b>0.083</b> | <b>0.028</b> | <b>0.016</b> | <b>0.026</b> | <b>0.013</b> | <b>0.029</b>    | <b>0.057</b> |
| DSDPBEP86(Full) | <b>0.018</b> | <b>0.027</b> | <b>0.029</b> | <b>0.025</b> | 0.137        | <b>0.050</b> | <b>0.040</b> | <b>0.061</b> | <b>0.040</b> | <b>0.045</b> | <b>0.066</b> | 0.163        | 0.180        | <b>0.036</b> | <b>0.078</b> | <b>0.072</b> | <b>0.018</b> | <b>0.041</b> | <b>0.014</b> | <b>0.056</b>    | <b>0.060</b> |
| revDSDPBEP86    | <b>0.032</b> | <b>0.039</b> | <b>0.075</b> | <b>0.078</b> | 0.150        | <b>0.067</b> | <b>0.049</b> | <b>0.055</b> | <b>0.058</b> | <b>0.043</b> | <b>0.055</b> | 0.193        | 0.183        | <b>0.056</b> | <b>0.092</b> | <b>0.015</b> | <b>0.025</b> | <b>0.010</b> | <b>0.034</b> | <b>0.017</b>    | <b>0.066</b> |
| revDSDPBEP86(F  | <b>0.023</b> | <b>0.035</b> | <b>0.061</b> | <b>0.059</b> | 0.144        | <b>0.064</b> | <b>0.046</b> | <b>0.060</b> | <b>0.054</b> | <b>0.036</b> | <b>0.060</b> | 0.179        | 0.182        | <b>0.047</b> | <b>0.082</b> | <b>0.049</b> | <b>0.018</b> | <b>0.019</b> | <b>0.022</b> | <b>0.033</b>    | <b>0.064</b> |
| PBEQIDH         | 0.130        | 0.128        | 0.175        | 0.172        | 0.212        | 0.184        | 0.135        | 0.107        | 0.173        | 0.122        | <b>0.095</b> | 0.329        | 0.190        | 0.127        | 0.128        | <b>0.084</b> | 0.138        | 0.103        | 0.141        | <b>0.098</b>    | <b>0.149</b> |
| PBEQIDH(Full)   | 0.117        | 0.115        | 0.160        | 0.158        | 0.209        | 0.177        | 0.128        | <b>0.091</b> | 0.164        | 0.110        | <b>0.081</b> | 0.316        | 0.192        | 0.121        | 0.118        | <b>0.058</b> | 0.131        | <b>0.088</b> | 0.123        | <b>0.058</b>    | <b>0.136</b> |
| MP2             | 0.219        | 0.188        | 0.203        | 0.198        | 0.283        | 0.273        | 0.150        | <b>0.091</b> | 0.241        | 0.120        | <b>0.076</b> | 0.636        | 0.207        | 0.138        | 0.178        | <b>0.057</b> | 0.144        | <b>0.061</b> | 0.153        | <b>0.063</b>    | <b>0.184</b> |
| MP2(Full)       | 0.182        | 0.149        | 0.165        | 0.158        | 0.271        | 0.253        | 0.130        | <b>0.067</b> | 0.224        | 0.106        | <b>0.055</b> | 0.599        | 0.201        | 0.117        | 0.133        | <b>0.079</b> | 0.123        | <b>0.064</b> | 0.130        | <b>0.096</b>    | <b>0.165</b> |
| MP3             | 0.274        | 0.243        | 0.249        | 0.250        | 0.319        | 0.277        | 0.182        | 0.117        | 0.244        | 0.153        | <b>0.098</b> | 0.601        | 0.208        | 0.161        | 0.229        | <b>0.049</b> | 0.192        | <b>0.034</b> | 0.164        | <b>0.030</b>    | <b>0.204</b> |
| MP3(Full)       | 0.240        | 0.206        | 0.207        | 0.206        | 0.309        | 0.261        | 0.164        | <b>0.093</b> | 0.230        | 0.139        | <b>0.079</b> | 0.571        | 0.204        | 0.137        | 0.180        | <b>0.043</b> | 0.165        | <b>0.022</b> | 0.121        | <b>0.046</b>    | <b>0.181</b> |
| CISD            | 0.325        | 0.295        | 0.347        | 0.356        | 0.336        | 0.328        | 0.221        | 0.153        | 0.312        | 0.202        | 0.137        | 0.594        | 0.222        | 0.193        | 0.276        | <b>0.098</b> | 0.268        | 0.104        | 0.260        | 0.101           | <b>0.256</b> |
| CISD(Full)      | 0.289        | 0.261        | 0.312        | 0.317        | 0.338        | 0.334        | 0.217        | 0.131        | 0.317        | 0.195        | 0.119        | 0.574        | 0.209        | 0.174        | 0.226        | <b>0.042</b> | 0.241        | <b>0.076</b> | 0.224        | <b>0.047</b>    | <b>0.232</b> |
| CCSD            | 0.282        | 0.253        | 0.272        | 0.270        | 0.317        | 0.292        | 0.188        | 0.121        | 0.271        | 0.162        | 0.102        | 0.599        | 0.220        | 0.163        | 0.242        | <b>0.061</b> | 0.209        | <b>0.052</b> | 0.190        | <b>0.044</b>    | <b>0.216</b> |
| CCSD(Full)      | 0.245        | 0.214        | 0.228        | 0.225        | 0.309        | 0.274        | 0.169        | <b>0.092</b> | 0.254        | 0.145        | <b>0.078</b> | 0.558        | 0.213        | 0.139        | 0.187        | <b>0.038</b> | 0.178        | <b>0.025</b> | 0.142        | <b>0.033</b>    | <b>0.187</b> |
| QCISD           | 0.280        | 0.251        | 0.272        | 0.270        | 0.316        | 0.293        | 0.189        | 0.120        | 0.266        | 0.162        | 0.101        | 0.601        | 0.219        | 0.160        | 0.241        | <b>0.060</b> | 0.206        | <b>0.050</b> | 0.189        | <b>0.043</b> </ |              |

|                |       |       |       |       |       |       |       |       |       |       |       |       |       |       |       |       |       |       |       |       |       |
|----------------|-------|-------|-------|-------|-------|-------|-------|-------|-------|-------|-------|-------|-------|-------|-------|-------|-------|-------|-------|-------|-------|
| QCISD(T)       | 0.249 | 0.215 | 0.198 | 0.172 | 0.298 | 0.260 | 0.154 | 0.098 | 0.226 | 0.125 | 0.072 | 0.565 | 0.214 | 0.115 | 0.205 | 0.030 | 0.133 | 0.023 | 0.105 | 0.028 | 0.174 |
| QCISD(T)(Full) | 0.199 | 0.166 | 0.163 | 0.168 | 0.278 | 0.235 | 0.110 | 0.077 | 0.194 | 0.078 | 0.050 | 0.530 | 0.210 | 0.098 | 0.141 | 0.061 | 0.115 | 0.026 | 0.084 | 0.053 | 0.152 |
| BD(T)          | 0.207 | 0.186 | 0.187 | 0.150 | 0.251 | 0.224 | 0.121 | 0.048 | 0.187 | 0.067 | 0.038 | 0.508 | 0.100 | 0.063 | 0.157 | 0.008 | 0.077 | 0.013 | 0.098 | 0.016 | 0.135 |
| BD(T)(Full)    | 0.180 | 0.111 | 0.182 | 0.178 | 0.310 | 0.235 | 0.129 | 0.066 | 0.271 | 0.104 | 0.043 | 0.556 | 0.085 | 0.041 | 0.091 | 0.038 | 0.091 | 0.012 | 0.074 | 0.027 | 0.141 |
| MP5            | 0.257 | 0.224 | 0.192 | 0.199 | 0.299 | 0.257 | 0.154 | 0.099 | 0.225 | 0.127 | 0.076 | 0.569 | 0.213 | 0.120 | 0.209 | 0.032 | 0.141 | 0.027 |       |       | 0.190 |
| MP5(Full)      | 0.213 | 0.177 | 0.180 | 0.176 | 0.276 | 0.231 | 0.441 | 0.063 | 0.201 | 0.078 | 0.049 | 0.498 | 0.208 | 0.101 | 0.150 | 0.058 | 0.138 | 0.030 |       |       | 0.182 |
| Ave            | 0.378 | 0.377 | 0.538 | 0.538 | 0.419 | 0.486 | 0.454 | 0.428 | 0.484 | 0.451 | 0.427 | 0.502 | 0.408 | 0.480 | 0.405 | 0.495 | 0.443 | 0.538 | 0.532 | 0.558 | 0.467 |
| PM7            | 0.528 |       |       |       |       |       |       |       |       |       |       |       |       |       |       |       |       |       |       |       |       |
| PM6            | 0.567 |       |       |       |       |       |       |       |       |       |       |       |       |       |       |       |       |       |       |       |       |
| Dreiding       | 0.000 |       |       |       |       |       |       |       |       |       |       |       |       |       |       |       |       |       |       |       |       |
| UFF            | 0.094 |       |       |       |       |       |       |       |       |       |       |       |       |       |       |       |       |       |       |       |       |

<sup>a</sup> A blank means that this method/basis set has not been used to calculate these 11-RG-Mols, so cc-pV5Z and aug-cc-pV5Z have not been calculated for MP5 and MP5(Full). For instance, the consumed memories of even MP5(Full)/aug-cc-pVTZ calculating <sup>84</sup>Kr<sub>2</sub>, MP5(Full)/6-311++G(3df,3pd) calculating <sup>84</sup>Kr<sub>2</sub>, MP5(Full)/cc-pVQZ calculating <sup>84</sup>Kr<sub>2</sub>, MP5(Full)/Def2QZVP calculating <sup>40</sup>Ar<sup>84</sup>Kr, MP5(Full)/aug-cc-pVQZ calculating <sup>20</sup>Ne<sup>84</sup>Kr, MP5(Full)/aug-cc-pVQZ calculating <sup>40</sup>Ar<sup>84</sup>Kr, MP3/UGBS1V++ calculating <sup>20</sup>Ne<sup>84</sup>Kr, and MP3/UGBS1V++ calculating <sup>84</sup>Kr<sub>2</sub> are respectively as large as ~730 GB, ~1.1 TB, ~1.4 TB, ~920 GB, ~1.2 TB, ~1.9 TB, ~1.2 TB, and ~3.1 TB (the latter two are used in Table S5), so some calculations are now impossible.

<sup>b</sup> The definition of 14 special methods are as follows: (1) BB1K/6-311++G\*\*: BB95/6-311++G\*\* lop(3/76=0580004200); (2) mPW1K/6-311++G\*\*: mPWPW91/6-311++G\*\* lop(3/76=0572004280); (3) mPW1B95/6-311++G\*\*: mPWB95/6-311++G\*\* lop(3/76=0690003100); (4) mPWB1K/6-311++G\*\*: mPWB95/6-311++G\*\* lop(3/76=0560004400); (5) mPW1KCIS/6-311++G\*\*: mPWKCIS/6-311++G\*\* lop(3/76=0850001500); (6) mPWKCIS1K/6-311++G\*\*: mPWKCIS/6-311++G\*\* lop(3/76=0590004100); (7) TPSS1KCIS/6-311++G\*\*: TPSSKCIS/6-311++G\*\* lop(3/76=0870001300); (8) PBE1KCIS/6-311++G\*\*: PBEKCIS/6-311++G\*\* lop(3/76=0780002200); (9) mPWLYP1M/6-311++G\*\*: mPWLYP/6-311++G\*\* lop(3/76=0950000500); (10) PBE1W/6-311++G\*\*: PBE1W/6-311++G\*\* lop(3/78=0740010000); (11) mPWLYP1W/6-311++G\*\*: mPWLYP/6-311++G\*\* lop(3/78=0880010000); (12) PBE1W/6-311++G\*\*: PBE1W/6-311++G\*\* lop(3/78=0740010000); (13) TPSSLYP1W/6-311++G\*\*: TPSSLYP1W/6-311++G\*\* lop(3/78=0740010000); (14) mPW3LYP/6-311++G\*\*: mPWLYP/6-311++G\*\* lop(3/76=1000002000) lop(3/77=0720008000) lop(3/78=0810010000).

<sup>c</sup> B2PLYP-D3 is different from B2PLYPD3 in this work, i.e., B2PLYPD3 is D3BJ dispersion corrected by definition (or by adding keyword "EmpiricalDispersion=GD3BJ" or "EM=GD3BJ" to B2PLYP), while B2PLYP-D3 is defined by adding keyword "EM=GD3" to B2PLYP or is D3 dispersion corrected.

<sup>d</sup> The definition of e.g. revDSDPBEP86/6-311++G\*\* is: DSDPBEP86/6-311++G\*\* EM=GD3BJ lop(3/125=0079905785, 3/78=0429604296, 3/76=0310006900, 3/74=1004, 3/174=0437700, 3/175=-1, 3/176=0, 3/177=-1, 3/178=5500000).

<sup>e</sup> A green or blue value means, respectively, that this MAD is smaller than 0.020 Å (with the one less than 0.010 Å slightly different) or is between 0.020~0.100 Å, while a black one means that this value is larger than 0.100 Å in which the largest one is shown with red.

<sup>f</sup> For some molecules optimized by post-MP3 methods, Gaussian 09 [S1] have to be used, especially for BD(T) and BD(T)(Full), because their successful optimization by Gaussian 16 cannot be attained even after 30 times. Moreover, for some molecules, both Gaussian 16 and Gaussian 09 cannot optimize them. For example, for the several method/basis sets listed in the text, i.e., BD(T)/aug-cc-pVTZ, BD(T)/aug-cc-pVQZ, BD(T)/aug-cc-pV5Z, BD(T)(Full)/aug-cc-pVQZ, MP4/aug-cc-pVQZ, and CCSD(T)/aug-cc-pVQZ, their numbers of the 11-RG-Mols successfully optimized only by Gaussian 09 are respectively 6 (i.e., <sup>84</sup>Kr<sub>2</sub>, HeAr, HeKr, <sup>20</sup>Ne<sup>40</sup>Ar, <sup>22</sup>Ne<sup>36</sup>Ar, and <sup>20</sup>Ne<sup>84</sup>Kr), 5 (i.e., Ne<sub>2</sub>, <sup>84</sup>Kr<sub>2</sub>, <sup>20</sup>Ne<sup>40</sup>Ar, <sup>22</sup>Ne<sup>36</sup>Ar, and <sup>20</sup>Ne<sup>84</sup>Kr), 5 (i.e., <sup>84</sup>Kr<sub>2</sub>, HeNe, <sup>20</sup>Ne<sup>40</sup>Ar, <sup>22</sup>Ne<sup>36</sup>Ar, and <sup>20</sup>Ne<sup>84</sup>Kr), 3 (i.e., <sup>4</sup>Kr<sub>2</sub>, HeNe, and <sup>20</sup>Ne<sup>84</sup>Kr), 0, and 0, in which HeKr cannot be successfully optimized by MP4/aug-cc-pVQZ. Not only HeKr and <sup>20</sup>Ne<sup>84</sup>Kr are successfully optimized by CCSD(T)/aug-cc-pV5Z only using Gaussian 09, but also <sup>84</sup>Kr<sub>2</sub> cannot be successfully optimized by CCSD(T)/aug-cc-pV5 and CCSD(T)(Full)/aug-cc-pV5. Only three molecules

(i.e., He<sub>2</sub>, HeNe, and Ne<sub>2</sub>) can be calculated by Dreiding, and 4 molecules containing He cannot be optimized by UFF. For the other methods and basis sets, all the 11 molecules are successfully optimized by Gaussian 16 except LC-N12 which has optimized 6 molecules (i.e., the 6 molecules that do not contain Ne).

Table S3. MDs (Å) of 11-RG-Mols calculated by 572 methods and 20 basis sets.

|           | BS01   | BS02   | BS03   | BS04   | BS05   | BS06   | BS07   | BS08   | BS09   | BS10   | BS11   | BS12   | BS13   | BS14   | BS15   | BS16   | BS17   | BS18   | BS19   | BS20   | Ave           |
|-----------|--------|--------|--------|--------|--------|--------|--------|--------|--------|--------|--------|--------|--------|--------|--------|--------|--------|--------|--------|--------|---------------|
| HF        | 0.791  | 0.758  | 1.309  | 1.309  | 0.567  | 0.914  | 0.804  | 0.726  | 0.913  | 0.804  | 0.726  | 0.855  | 0.345  | 0.918  | 0.665  | 1.105  | 1.013  | 1.259  | 1.308  | 1.308  | <b>0.920</b>  |
| APFD      | -0.094 | -0.100 | -0.005 | -0.005 | -0.178 | -0.005 | -0.045 | -0.054 | -0.006 | -0.047 | -0.056 | 0.006  | -0.271 | -0.005 | -0.127 | -0.016 | -0.053 | -0.003 | -0.012 | -0.007 | <b>-0.054</b> |
| wB97      | -0.147 | -0.159 | 0.337  | 0.338  | -0.220 | 0.149  | 0.051  | -0.011 | 0.148  | 0.081  | 0.015  | 0.170  | -0.355 | 0.050  | -0.152 | 0.040  | 0.131  | 0.282  | 0.283  | 0.350  | <b>0.069</b>  |
| wB97X     | -0.102 | -0.109 | 0.001  | 0.001  | -0.182 | -0.008 | -0.041 | -0.065 | -0.009 | -0.043 | -0.066 | -0.003 | -0.286 | -0.034 | -0.145 | -0.066 | -0.050 | -0.024 | -0.007 | 0.002  | <b>-0.062</b> |
| wB97XD    | 0.294  | 0.292  | 0.381  | 0.381  | 0.192  | 0.355  | 0.335  | 0.319  | 0.355  | 0.334  | 0.319  | 0.357  | 0.109  | 0.343  | 0.251  | 0.370  | 0.333  | 0.393  | 0.378  | 0.393  | <b>0.324</b>  |
| B98       | 0.014  | 0.010  | 0.087  | 0.087  | -0.079 | 0.077  | 0.044  | 0.036  | 0.076  | 0.043  | 0.035  | 0.089  | -0.177 | 0.088  | -0.033 | 0.076  | 0.041  | 0.085  | 0.085  | 0.085  | <b>0.039</b>  |
| B971      | -0.089 | -0.091 | -0.028 | -0.028 | -0.161 | -0.031 | -0.058 | -0.067 | -0.033 | -0.059 | -0.069 | -0.021 | -0.254 | -0.029 | -0.120 | -0.034 | -0.061 | -0.034 | -0.031 | -0.031 | <b>-0.066</b> |
| B972      | 0.367  | 0.359  | 0.495  | 0.495  | 0.228  | 0.471  | 0.431  | 0.397  | 0.471  | 0.429  | 0.396  | 0.484  | 0.099  | 0.456  | 0.299  | 0.507  | 0.401  | 0.514  | 0.494  | 0.506  | <b>0.415</b>  |
| BHandH    | -0.527 | -0.528 | -0.519 | -0.519 | -0.555 | -0.521 | -0.534 | -0.532 | -0.523 | -0.536 | -0.534 | -0.507 | -0.610 | -0.540 | -0.534 | -0.525 | -0.523 | -0.522 | -0.521 | -0.522 | <b>-0.532</b> |
| BHandHLYP | 0.023  | 0.022  | 0.485  | 0.484  | -0.020 | 0.527  | 0.111  | 0.079  | 0.448  | 0.096  | 0.076  | 0.316  | -0.243 | 0.144  | 0.178  | 0.483  | 0.450  | 0.539  | 0.530  | 0.532  | <b>0.263</b>  |
| HFS       | -0.359 | -0.362 | -0.311 | -0.311 | -0.401 | -0.295 | -0.324 | -0.326 | -0.297 | -0.327 | -0.329 | -0.274 | -0.498 | -0.322 | -0.379 | -0.320 | -0.334 | -0.313 | -0.316 | -0.309 | <b>-0.335</b> |
| HFB       | 1.977  | 1.983  | 2.233  | 2.234  | 1.485  | 2.159  | 2.160  | 2.112  | 2.231  | 2.185  | 2.109  | 2.163  | 1.504  | 2.282  | 1.831  | 2.262  | 2.061  | 2.374  | 2.287  | 2.521  | <b>2.108</b>  |
| XAlpha    | -0.412 | -0.414 | -0.378 | -0.378 | -0.446 | -0.363 | -0.390 | -0.391 | -0.366 | -0.393 | -0.394 | -0.340 | -0.533 | -0.391 | -0.427 | -0.387 | -0.393 | -0.380 | -0.381 | -0.378 | <b>-0.397</b> |
| LSDA      | -0.504 | -0.506 | -0.488 | -0.488 | -0.526 | -0.473 | -0.497 | -0.497 | -0.477 | -0.500 | -0.501 | -0.449 | -0.595 | -0.502 | -0.514 | -0.496 | -0.496 | -0.491 | -0.491 | -0.491 | <b>-0.499</b> |
| LC-LSDA   | 0.159  | 0.148  | 0.396  | 0.396  | 0.019  | 0.354  | 0.294  | 0.266  | 0.355  | 0.294  | 0.265  | 0.355  | -0.138 | 0.355  | 0.121  | 0.325  | 0.267  | 0.408  | 0.394  | 0.419  | <b>0.272</b>  |
| HCTH      | -0.119 | -0.120 | -0.078 | -0.078 | -0.182 | -0.083 | -0.092 | -0.094 | -0.084 | -0.093 | -0.095 | -0.077 | -0.240 | -0.057 | -0.141 | -0.071 | -0.100 | -0.080 | -0.077 | -0.080 | <b>-0.102</b> |
| HCTH93    | 0.853  | 0.850  | 1.098  | 1.099  | 0.612  | 1.097  | 1.080  | 1.022  | 1.093  | 1.083  | 1.024  | 1.065  | 0.479  | 0.951  | 0.735  | 1.179  | 0.882  | 1.195  | 1.184  | 1.256  | <b>0.992</b>  |
| HCTH147   | 0.114  | 0.110  | 0.192  | 0.192  | 0.009  | 0.187  | 0.163  | 0.155  | 0.186  | 0.162  | 0.154  | 0.194  | -0.071 | 0.204  | 0.070  | 0.205  | 0.135  | 0.198  | 0.189  | 0.190  | <b>0.147</b>  |
| tHCTH     | 0.092  | 0.090  | 0.135  | 0.135  | -0.004 | 0.126  | 0.109  | 0.102  | 0.126  | 0.108  | 0.102  | 0.132  | -0.089 | 0.136  | 0.049  | 0.150  | 0.092  | 0.142  | 0.130  | 0.126  | <b>0.099</b>  |
| tHCTHhyb  | 0.205  | 0.198  | 0.307  | 0.307  | 0.079  | 0.284  | 0.253  | 0.239  | 0.283  | 0.251  | 0.238  | 0.300  | -0.014 | 0.291  | 0.143  | 0.315  | 0.228  | 0.309  | 0.296  | 0.300  | <b>0.241</b>  |
| VSXC      | -0.176 | -0.176 | -0.132 | -0.132 | -0.147 | -0.139 | -0.177 | -0.178 | -0.140 | -0.178 | -0.179 | -0.137 | -0.049 | -0.174 | -0.202 | -0.165 | -0.138 | -0.159 | -0.134 | -0.159 | <b>-0.153</b> |
| BMK       | 1.669  | 1.667  | 1.810  | 1.881  | 1.411  | 1.494  | 1.497  | 1.419  | 1.515  | 1.458  | 1.447  | 1.536  | 1.097  | 1.682  | 1.676  | 1.605  | 1.746  | 1.719  | 1.866  | 1.969  | <b>1.608</b>  |
| TPSSh     | 0.189  | 0.187  | 0.271  | 0.270  | 0.067  | 0.261  | 0.236  | 0.225  | 0.259  | 0.235  | 0.225  | 0.269  | -0.047 | 0.269  | 0.137  | 0.299  | 0.211  | 0.304  | 0.267  | 0.270  | <b>0.220</b>  |
| APF       | 0.507  | 0.470  | 0.835  | 0.835  | 0.360  | 0.797  | 0.699  | 0.606  | 0.799  | 0.725  | 0.602  | 0.800  | 0.190  | 0.738  | 0.417  | 0.907  | 0.702  | 0.908  | 0.846  | 0.898  | <b>0.682</b>  |
| OAPF      | 0.103  | 0.097  | 0.243  | 0.245  | -0.002 | 0.236  | 0.170  | 0.154  | 0.235  | 0.168  | 0.151  | 0.247  | -0.146 | 0.242  | 0.061  | 0.254  | 0.173  | 0.247  | 0.241  | 0.244  | <b>0.168</b>  |
| GVb(0)    | 0.768  | 0.768  | 1.287  | 1.287  | 0.574  | 0.923  | 0.792  | 0.718  | 0.923  | 0.792  | 0.717  | 0.865  | 0.335  | 0.897  | 0.664  | 1.090  | 1.016  | 1.247  | 1.285  | 1.276  | <b>0.911</b>  |
| B97D      | 0.059  | 0.055  | 0.147  | 0.147  | -0.041 | 0.163  | 0.139  | 0.132  | 0.162  | 0.138  | 0.131  | 0.173  | -0.119 | 0.158  | 0.015  | 0.174  | 0.078  | 0.159  | 0.142  | 0.137  | <b>0.108</b>  |
| B97D3     | 0.114  | 0.109  | 0.199  | 0.200  | 0.000  | 0.209  | 0.172  | 0.162  | 0.208  | 0.172  | 0.161  | 0.226  | -0.078 | 0.210  | 0.061  | 0.224  | 0.138  | 0.213  | 0.196  | 0.198  | <b>0.155</b>  |
| B3LYP     | 0.982  | 1.057  | 1.864  | 1.910  | 0.853  | 1.416  | 1.190  | 1.069  | 1.380  | 1.195  | 1.074  | 1.349  | 0.282  | 1.142  | 0.981  | 1.772  | 1.174  | 1.910  | 1.828  | 1.990  | <b>1.321</b>  |
| B3P86     | 1.725  | 1.698  | 2.019  | 2.020  | 1.307  | 1.734  | 1.661  | 1.580  | 1.697  | 1.656  | 1.581  | 1.737  | 1.363  | 1.767  | 1.721  | 1.861  | 1.807  | 2.106  | 2.034  | 2.151  | <b>1.761</b>  |
| B3PW91    | 1.676  | 1.654  | 2.031  | 2.010  | 1.227  | 1.650  | 1.611  | 1.530  | 1.627  | 1.611  | 1.536  | 1.651  | 1.359  | 1.588  | 1.587  | 1.826  | 1.749  | 2.059  | 1.966  | 2.077  | <b>1.701</b>  |
| X3LYP     | -0.005 | -0.010 | 0.107  | 0.107  | -0.075 | 0.104  | 0.067  | 0.052  | 0.111  | 0.066  | 0.050  | 0.138  | -0.252 | 0.101  | -0.025 | 0.121  | 0.054  | 0.097  | 0.105  | 0.108  | <b>0.051</b>  |
| O3LYP     | 0.236  | 0.231  | 0.381  | 0.381  | 0.107  | 0.380  | 0.355  | 0.340  | 0.380  | 0.357  | 0.340  | 0.382  | -0.039 | 0.332  | 0.185  | 0.432  | 0.292  | 0.399  | 0.391  | 0.392  | <b>0.313</b>  |
| B1LYP     | 1.142  | 0.975  | 1.803  | 1.828  | 0.823  | 1.444  | 1.186  | 1.132  | 1.472  | 1.211  | 1.146  | 1.439  | 0.407  | 1.255  | 1.030  | 1.724  | 1.274  | 2.103  | 1.741  | 2.047  | <b>1.359</b>  |
| B1B95     | 0.207  | 0.207  | 0.273  | 0.273  | 0.204  | 0.406  | 0.362  | 0.297  | 0.406  | 0.362  | 0.297  | 0.427  | 0.184  | 0.230  | 0.174  | 0.444  | 0.246  | 0.276  | 0.241  | 0.311  | <b>0.291</b>  |
| OmPW1LYP  | -0.175 | -0.176 | -0.117 | -0.117 | -0.244 | -0.126 | -0.145 | -0.146 | -0.127 | -0.146 | -0.147 | -0.114 | -0.355 | -0.125 | -0.199 | -0.117 | -0.141 | -0.115 | -0.117 | -0.115 | <b>-0.153</b> |
| LG1LYP    | -0.316 | -0.316 | -0.283 | -0.283 | -0.363 | -0.282 | -0.298 | -0.297 | -0.283 | -0.300 | -0.299 | -0.270 | -0.444 | -0.284 | -0.331 | -0.284 | -0.295 | -0.286 | -0.284 | -0.284 | <b>-0.304</b> |
| mPW1LYP   | -0.151 | -0.152 | -0.087 | -0.087 | -0.225 | -0.098 | -0.119 | -0.121 | -0.099 | -0.121 | -0.122 | -0.086 | -0.341 | -0.095 | -0.178 | -0.088 | -0.114 | -0.085 | -0.087 | -0.084 | <b>-0.127</b> |
| mPW1PW91  | 0.376  | 0.369  | 0.511  | 0.511  | 0.223  | 0.505  | 0.461  | 0.405  | 0.504  | 0.459  | 0.404  | 0.501  | 0.056  | 0.440  | 0.295  | 0.540  | 0.420  | 0.532  | 0.512  | 0.523  | <b>0.427</b>  |
| mPW1PBE   | 0.385  | 0.377  | 0.519  | 0.519  | 0.232  | 0.512  | 0.468  | 0.425  | 0.509  | 0.467  | 0.427  | 0.511  | 0.066  | 0.450  | 0.303  | 0.550  | 0.431  | 0.542  | 0.517  | 0.533  | <b>0.437</b>  |
| mPW3PBE   | 0.310  | 0.301  | 0.461  | 0.461  | 0.168  | 0.439  | 0.391  | 0.363  | 0.439  | 0.390  | 0.362  | 0.444  | 0.011  | 0.398  | 0.245  | 0.475  | 0.353  | 0.486  | 0.458  | 0.477  | <b>0.372</b>  |
| PBE1PBE   | 0.026  | 0.021  | 0.114  | 0.114  | -0.074 | 0.106  | 0.062  | 0.050  | 0.099  | 0.060  | 0.048  | 0.117  | -0.176 | 0.108  | -0.021 | 0.100  | 0.063  | 0.112  | 0.109  | 0.112  | <b>0.057</b>  |
| PBEh1PBE  | 0.018  | 0.013  | 0.104  | 0.104  | -0.079 | 0.086  | 0.053  | 0.041  | 0.085  | 0.052  | 0.038  | 0.099  | -0.181 | 0.104  | -0.027 | 0.092  | 0.054  | 0.098  | 0.101  | 0.102  | <b>0.048</b>  |
| HSEh1PBE  | 0.003  | 0.000  | 0.086  | 0.086  | -0.088 | 0.072  | 0.037  | 0.024  | 0.071  | 0.036  | 0.022  | 0.083  | -0.188 | 0.083  | -0.038 | 0.071  | 0.040  | 0.083  | 0.079  | 0.083  | <b>0.032</b>  |
| OHSE1PBE  | 0.004  | 0.000  | 0.090  | 0.090  | -0.088 | 0.073  | 0.038  | 0.024  | 0.071  | 0.036  | 0.023  | 0.083  | -0.189 | 0.083  | -0.037 | 0.071  | 0.042  | 0.083  | 0.083  | 0.086  | <b>0.033</b>  |
| OHSE2PBE  | -0.018 | -0.021 | 0.054  | 0.054  | -0.104 | 0.041  | 0.006  | -0.001 | 0.040  | 0.005  | -0.003 | 0.053  | -0.198 | 0.056  | -0.056 | 0.045  | 0.009  | 0.048  | 0.051  | 0.050  | <b>0.006</b>  |
| HISSbPBE  | 0.021  | 0.017  | 0.095  | 0.095  | -0.081 | 0.081  | 0.046  | 0.034  | 0.080  | 0.045  | 0.033  | 0.090  | -0.183 | 0.080  | -0.031 | 0.073  | 0.054  | 0.088  | 0.091  | 0.090  | <b>0.041</b>  |
| M06       | 0.051  | 0.051  | 0.138  | 0.138  | 0.009  | 0.059  | 0.056  | 0.056  | 0.059  | 0.056  | 0.055  | 0.060  | -0.030 | 0.040  | 0.036  | 0.058  | 0.160  | 0.166  | 0.137  | 0.150  | <b>0.075</b>  |
| M06L      | 0.104  | 0.104  | 0.131  | 0.131  | 0.049  | 0.103  | 0.076  | 0.049  | 0.103  | 0.076  | 0.049  | 0.105  | -0.053 | 0.067  | 0.088  | 0.048  | 0.129  | 0.087  | 0.102  | 0.064  | <b>0.081</b>  |
| M06HF     | 0.111  | 0.111  | 0.123  | 0.123  | 0.072  | 0.122  | 0.118  | 0.115  | 0.122  | 0.118  | 0.115  | 0.123  | -0.028 | 0.090  | 0.103  | 0.120  | 0.120  | 0.125  | 0.120  | 0.090  | <b>0.106</b>  |
| M062X     | 0.055  | 0.054  | 0.126  | 0.126  | -0.040 | 0.088  | 0.070  | 0.065  | 0.088  | 0.069  | 0.065  | 0.091  | -0.256 | -0.029 | 0.011  | 0.084  | 0.100  | 0.127  | 0.126  | 0.151  | <b>0.058</b>  |
| M05       | -0.193 | -0.196 | -0.162 | -0.162 | -0.276 | -0.181 | -0.191 | -0.188 | -0.183 | -0.192 | -0.189 | -0.172 | -0.387 | -0.247 | -0.220 | -0.150 | -0.173 | -0.154 | -0.158 | -0.152 | <b>-0.196</b> |
| M052X     | -0.123 | -0.123 | -0.092 | -0.092 | -0.203 | -0.122 | -0.133 | -0.133 | -0.123 | -0.134 | -0.134 | -0.116 | -0.285 | -0.116 | -0.164 | -0.118 | -0.096 | -0.090 | -0.093 | -0.094 | <b>-0.129</b> |

|            |        |        |        |        |        |        |        |        |        |        |        |        |        |        |        |        |        |        |        |        |               |
|------------|--------|--------|--------|--------|--------|--------|--------|--------|--------|--------|--------|--------|--------|--------|--------|--------|--------|--------|--------|--------|---------------|
| PW6B95     | 0.026  | 0.026  | 0.063  | 0.063  | -0.128 | 0.057  | 0.055  | 0.042  | 0.057  | 0.055  | 0.042  | 0.085  | -0.177 | 0.071  | -0.026 | 0.060  | 0.048  | 0.062  | 0.063  | 0.064  | <b>0.030</b>  |
| PW6B95D3   | -0.017 | -0.017 | 0.031  | 0.031  | -0.160 | 0.024  | 0.022  | 0.010  | 0.024  | 0.022  | 0.010  | 0.026  | -0.182 | 0.039  | -0.059 | 0.027  | 0.016  | 0.031  | 0.031  | 0.032  | <b>-0.003</b> |
| M08HX      | -0.106 | -0.127 | 0.033  | 0.033  | -0.208 | -0.058 | -0.067 | -0.068 | -0.059 | -0.068 | -0.069 | -0.051 | -0.332 | -0.204 | -0.140 | -0.099 | -0.039 | 0.038  | 0.038  | 0.101  | <b>-0.073</b> |
| M11        | 0.087  | 0.087  | 0.153  | 0.153  | -0.058 | 0.126  | 0.122  | 0.118  | 0.126  | 0.122  | 0.118  | 0.128  | -0.229 | 0.064  | 0.001  | 0.095  | 0.138  | 0.144  | 0.153  | 0.159  | <b>0.090</b>  |
| M11L       | 0.699  | 0.731  | 0.970  | 0.970  | 0.623  | 0.801  | 0.773  | 0.589  | 0.799  | 0.773  | 0.589  | 0.804  | 0.402  | 0.583  | 0.587  | 0.799  | 0.870  | 1.025  | 0.949  | 1.049  | <b>0.769</b>  |
| SOGGA11    | -0.377 | -0.377 | -0.310 | -0.310 | -0.171 | -0.333 | -0.337 | -0.343 | -0.333 | -0.337 | -0.343 | -0.329 | 0.458  | -0.277 | -0.349 | -0.343 | -0.336 | -0.351 | -0.315 | -0.335 | <b>-0.287</b> |
| SOGGA11X   | 0.879  | 0.868  | 1.053  | 1.052  | 0.726  | 0.938  | 0.911  | 0.909  | 0.929  | 0.911  | 0.909  | 0.953  | 0.316  | 0.756  | 0.786  | 1.024  | 0.927  | 1.018  | 1.029  | 1.051  | <b>0.897</b>  |
| N12        | 0.945  | 0.910  | 1.556  | 1.563  | 0.548  | 1.297  | 1.285  | 1.233  | 1.344  | 1.320  | 1.206  | 1.357  | 0.251  | 1.288  | 0.717  | 1.474  | 1.072  | 1.596  | 1.487  | 1.614  | <b>1.203</b>  |
| N12SX      | 0.599  | 0.602  | 1.548  | 1.563  | 0.627  | 1.282  | 0.962  | 0.875  | 1.287  | 0.971  | 0.914  | 1.288  | 0.012  | 0.829  | 0.574  | 1.230  | 0.968  | 1.621  | 1.574  | 1.733  | <b>1.053</b>  |
| MN12SX     | 0.285  | 0.285  | 0.798  | 0.798  | 0.191  | 0.445  | 0.404  | 0.360  | 0.446  | 0.403  | 0.340  | 0.449  | -0.153 | 0.280  | 0.122  | 0.320  | 0.617  | 0.915  | 0.764  | 0.893  | <b>0.448</b>  |
| MN12L      | 0.792  | 0.731  | 1.051  | 1.051  | 0.611  | 0.844  | 0.815  | 0.769  | 0.845  | 0.815  | 0.769  | 0.813  | 0.040  | 0.452  | 0.609  | 0.816  | 0.874  | 1.157  | 0.955  | 1.259  | <b>0.803</b>  |
| MN15       | -0.079 | -0.083 | -0.016 | -0.016 | -0.130 | -0.016 | -0.031 | -0.041 | -0.017 | -0.032 | -0.041 | -0.001 | -0.186 | -0.014 | -0.124 | -0.044 | -0.073 | -0.031 | -0.022 | -0.028 | <b>-0.051</b> |
| MN15L      | -0.005 | -0.015 | 0.018  | 0.018  | -0.077 | 0.008  | 0.002  | -0.001 | 0.008  | 0.001  | -0.010 | 0.030  | -0.101 | -0.012 | -0.077 | -0.008 | 0.008  | 0.011  | 0.018  | 0.015  | <b>-0.008</b> |
| LC-HFS     | 0.468  | 0.457  | 1.062  | 1.062  | 0.307  | 1.002  | 0.941  | 0.861  | 1.001  | 0.940  | 0.852  | 1.008  | 0.036  | 0.910  | 0.417  | 1.058  | 0.722  | 1.184  | 1.080  | 1.200  | <b>0.828</b>  |
| LC-HFB     | 0.470  | 0.458  | 1.073  | 1.073  | 0.305  | 1.017  | 0.946  | 0.850  | 1.016  | 0.940  | 0.860  | 0.987  | 0.036  | 0.952  | 0.417  | 1.125  | 0.725  | 1.161  | 1.070  | 1.281  | <b>0.838</b>  |
| LC-XAlpha  | 0.472  | 0.460  | 1.047  | 1.047  | 0.299  | 0.981  | 0.923  | 0.814  | 1.004  | 0.929  | 0.813  | 0.945  | 0.034  | 0.916  | 0.421  | 1.094  | 0.714  | 1.093  | 1.048  | 1.200  | <b>0.813</b>  |
| LC-M06L    | -0.722 | -0.723 | -0.712 | -0.712 | -0.734 | -0.712 | -0.722 | -0.723 | -0.713 | -0.723 | -0.724 | -0.703 | -0.673 | -0.712 | -0.721 | -0.718 | -0.718 | -0.719 | -0.716 | -0.718 | <b>-0.716</b> |
| LC-M11L    | 0.699  | 0.731  | 0.971  | 0.971  | 0.623  | 0.801  | 0.773  | 0.589  | 0.799  | 0.773  | 0.589  | 0.804  | 0.402  | 0.583  | 0.587  | 0.799  | 0.870  | 1.025  | 0.948  | 1.051  | <b>0.769</b>  |
| LC-N12     | 1.735  | 1.735  | 2.143  | 2.145  | 1.811  | 1.828  | 1.812  | 1.787  | 1.829  | 1.806  | 1.785  | 1.829  | 1.343  | 1.779  | 1.827  | 1.792  | 2.001  | 2.170  | 2.071  | 2.139  | <b>1.868</b>  |
| LC-B97D    | -0.658 | -0.658 | -0.651 | -0.651 | -0.672 | -0.648 | -0.652 | -0.651 | -0.648 | -0.653 | -0.652 | -0.641 | -0.705 | -0.648 | -0.659 | -0.651 | -0.653 | -0.651 | -0.651 | -0.651 | <b>-0.655</b> |
| LC-B97D3   | -0.705 | -0.706 | -0.698 | -0.698 | -0.717 | -0.693 | -0.698 | -0.698 | -0.694 | -0.699 | -0.699 | -0.685 | -0.750 | -0.695 | -0.705 | -0.698 | -0.700 | -0.699 | -0.699 | -0.698 | <b>-0.702</b> |
| LC-wPBE    | 0.248  | 0.240  | 0.631  | 0.629  | 0.117  | 0.581  | 0.524  | 0.510  | 0.581  | 0.519  | 0.510  | 0.572  | -0.073 | 0.531  | 0.210  | 0.537  | 0.406  | 0.679  | 0.639  | 0.723  | <b>0.466</b>  |
| LC-wHPBE   | 0.244  | 0.238  | 0.671  | 0.669  | 0.117  | 0.576  | 0.521  | 0.461  | 0.576  | 0.521  | 0.463  | 0.553  | -0.073 | 0.559  | 0.208  | 0.555  | 0.405  | 0.675  | 0.631  | 0.718  | <b>0.464</b>  |
| CAM-B3LYP  | -0.096 | -0.098 | 0.033  | 0.033  | -0.174 | 0.024  | -0.024 | -0.029 | 0.020  | -0.027 | -0.031 | 0.036  | -0.327 | -0.007 | -0.114 | 0.015  | -0.017 | 0.033  | 0.027  | 0.035  | <b>-0.034</b> |
| LC-HCTH    | -0.558 | -0.558 | -0.541 | -0.541 | -0.579 | -0.538 | -0.541 | -0.540 | -0.538 | -0.542 | -0.541 | -0.532 | -0.623 | -0.534 | -0.559 | -0.537 | -0.546 | -0.540 | -0.540 | -0.539 | <b>-0.548</b> |
| LC-tHCTH   | -0.736 | -0.737 | -0.730 | -0.730 | -0.745 | -0.723 | -0.728 | -0.728 | -0.724 | -0.729 | -0.729 | -0.716 | -0.777 | -0.726 | -0.735 | -0.729 | -0.731 | -0.730 | -0.730 | -0.729 | <b>-0.732</b> |
| LC-XaVP86  | -0.180 | -0.182 | 0.441  | 0.442  | -0.244 | 0.174  | 0.073  | -0.002 | 0.171  | 0.072  | -0.002 | 0.188  | -0.280 | 0.163  | -0.093 | 0.005  | 0.184  | 0.276  | 0.419  | 0.479  | <b>0.105</b>  |
| LC-XaVWN   | 0.156  | 0.147  | 0.380  | 0.381  | 0.016  | 0.338  | 0.278  | 0.251  | 0.337  | 0.277  | 0.251  | 0.340  | -0.142 | 0.346  | 0.119  | 0.311  | 0.262  | 0.389  | 0.380  | 0.404  | <b>0.261</b>  |
| LC-XaVWN5  | 0.206  | 0.202  | 0.496  | 0.496  | 0.081  | 0.468  | 0.384  | 0.340  | 0.466  | 0.384  | 0.336  | 0.467  | -0.111 | 0.447  | 0.175  | 0.443  | 0.334  | 0.519  | 0.501  | 0.536  | <b>0.359</b>  |
| BB95       | 0.549  | 0.721  | 0.636  | 0.636  | 0.499  | 0.693  | 1.040  | 0.634  | 0.705  | 0.598  | 0.650  | 0.593  | 0.335  | 0.464  | 0.654  | 1.383  | 0.836  | 0.874  | 0.657  | 0.646  | <b>0.690</b>  |
| BBRC       | 1.819  | 1.815  | 2.206  | 2.206  | 1.368  | 1.949  | 1.951  | 1.964  | 1.950  | 1.952  | 1.954  | 1.976  | 1.460  | 2.034  | 1.833  | 2.234  | 1.885  | 2.232  | 2.216  | 2.336  | <b>1.967</b>  |
| BKCIS      | 1.829  | 1.827  | 2.208  | 2.208  | 1.399  | 1.905  | 1.903  | 1.897  | 1.908  | 1.901  | 1.896  | 1.944  | 1.397  | 1.964  | 1.814  | 2.204  | 1.917  | 2.232  | 2.205  | 2.288  | <b>1.942</b>  |
| BLYP       | 1.667  | 1.673  | 2.216  | 2.221  | 1.005  | 1.885  | 1.859  | 1.779  | 1.835  | 1.863  | 1.816  | 1.895  | 0.778  | 1.701  | 1.065  | 2.140  | 1.380  | 2.222  | 2.216  | 2.320  | <b>1.777</b>  |
| BP86       | 1.891  | 1.891  | 2.219  | 2.219  | 1.692  | 1.977  | 2.007  | 2.001  | 1.999  | 2.007  | 2.005  | 1.978  | 1.425  | 2.099  | 1.891  | 2.164  | 1.936  | 2.248  | 2.227  | 2.390  | <b>2.013</b>  |
| BPBE       | 1.801  | 1.822  | 2.169  | 2.164  | 1.398  | 1.906  | 1.873  | 1.822  | 1.875  | 1.872  | 1.867  | 1.938  | 1.519  | 1.962  | 1.845  | 2.143  | 1.869  | 2.232  | 2.165  | 2.341  | <b>1.929</b>  |
| BPKZB      | 1.810  | 1.809  | 2.136  | 2.135  | 1.408  | 1.929  | 1.794  | 1.784  | 1.916  | 1.867  | 1.750  | 1.916  | 1.463  | 1.979  | 1.798  | 2.111  | 1.877  | 2.230  | 2.123  | 2.333  | <b>1.908</b>  |
| BPL        | 1.818  | 1.811  | 2.125  | 2.121  | 1.365  | 1.902  | 1.896  | 1.826  | 1.905  | 1.860  | 1.786  | 1.934  | 1.423  | 1.802  | 1.757  | 2.105  | 1.866  | 2.227  | 2.114  | 2.205  | <b>1.892</b>  |
| BPW91      | 1.822  | 1.821  | 2.149  | 2.139  | 1.467  | 1.946  | 1.867  | 1.774  | 1.943  | 1.871  | 1.759  | 1.946  | 1.461  | 1.985  | 1.794  | 2.112  | 1.920  | 2.223  | 2.109  | 2.301  | <b>1.921</b>  |
| BRvTPSS    | 1.815  | 1.794  | 2.190  | 2.201  | 1.442  | 1.918  | 1.883  | 1.801  | 1.924  | 1.915  | 1.768  | 1.918  | 1.490  | 2.002  | 1.770  | 2.133  | 1.888  | 2.239  | 2.238  | 2.256  | <b>1.929</b>  |
| BTPSS      | 1.814  | 1.831  | 2.170  | 2.166  | 1.455  | 1.915  | 1.942  | 1.754  | 1.916  | 1.914  | 1.863  | 1.915  | 1.428  | 1.937  | 1.803  | 2.165  | 1.875  | 2.224  | 2.141  | 2.333  | <b>1.928</b>  |
| BVP86      | 1.882  | 1.883  | 2.217  | 2.220  | 1.684  | 1.997  | 2.007  | 1.995  | 1.975  | 2.011  | 1.971  | 1.997  | 1.431  | 2.110  | 1.910  | 2.165  | 1.982  | 2.287  | 2.222  | 2.389  | <b>2.017</b>  |
| BVWN       | 1.856  | 1.859  | 2.106  | 2.117  | 1.269  | 1.758  | 1.710  | 1.658  | 1.757  | 1.710  | 1.663  | 1.765  | 1.481  | 1.704  | 1.764  | 1.971  | 1.831  | 2.179  | 1.986  | 2.304  | <b>1.822</b>  |
| BVWN5      | 1.814  | 1.813  | 2.116  | 2.115  | 1.362  | 1.896  | 1.861  | 1.814  | 1.937  | 1.897  | 1.786  | 1.939  | 1.468  | 1.794  | 1.770  | 2.112  | 1.867  | 2.221  | 2.111  | 2.211  | <b>1.895</b>  |
| BRxB95     | 0.136  | 0.136  | 0.168  | 0.168  | 0.078  | 0.199  | 0.141  | 0.139  | 0.198  | 0.141  | 0.139  | 0.200  | 0.045  | 0.170  | 0.135  | 0.176  | 0.140  | 0.144  | 0.168  | 0.143  | <b>0.148</b>  |
| BRxBRC     | 1.242  | 1.172  | 1.721  | 1.717  | 0.844  | 1.376  | 1.370  | 1.319  | 1.373  | 1.364  | 1.291  | 1.415  | 0.788  | 1.305  | 1.034  | 1.691  | 1.194  | 1.737  | 1.661  | 1.890  | <b>1.375</b>  |
| BRxKCIS    | 1.233  | 1.231  | 1.603  | 1.603  | 0.882  | 1.382  | 1.346  | 1.204  | 1.383  | 1.328  | 1.192  | 1.386  | 0.778  | 1.245  | 0.984  | 1.664  | 1.194  | 1.745  | 1.588  | 1.745  | <b>1.336</b>  |
| BRxLYP     | -0.073 | -0.078 | 0.045  | 0.045  | -0.141 | 0.085  | 0.020  | 0.009  | 0.081  | 0.018  | 0.006  | 0.116  | -0.285 | 0.153  | -0.098 | 0.076  | -0.011 | 0.033  | 0.041  | 0.038  | <b>0.004</b>  |
| BRxP86     | 1.473  | 1.439  | 2.093  | 2.097  | 1.104  | 1.630  | 1.437  | 1.366  | 1.631  | 1.437  | 1.393  | 1.704  | 0.962  | 1.587  | 0.998  | 1.770  | 1.684  | 2.079  | 2.045  | 2.133  | <b>1.603</b>  |
| BRxPBE     | 1.531  | 1.522  | 1.753  | 1.754  | 0.946  | 1.484  | 1.403  | 1.387  | 1.435  | 1.372  | 1.436  | 1.443  | 0.931  | 1.416  | 1.125  | 1.796  | 1.433  | 1.891  | 1.822  | 1.964  | <b>1.492</b>  |
| BRxPKZB    | 1.392  | 1.445  | 1.792  | 1.792  | 0.990  | 1.466  | 1.365  | 1.380  | 1.438  | 1.454  | 1.406  | 1.487  | 0.888  | 1.419  | 1.152  | 1.698  | 1.476  | 1.930  | 1.849  | 1.935  | <b>1.488</b>  |
| BRxPL      | 1.287  | 1.248  | 1.615  | 1.615  | 0.888  | 1.353  | 1.360  | 1.241  | 1.352  | 1.362  | 1.246  | 1.372  | 0.832  | 1.213  | 1.121  | 1.612  | 1.260  | 1.707  | 1.607  | 1.733  | <b>1.351</b>  |
| BRxPW91    | 1.476  | 1.442  | 1.820  | 1.820  | 0.987  | 1.513  | 1.414  | 1.364  | 1.479  | 1.402  | 1.374  | 1.529  | 0.883  | 1.443  | 1.246  | 1.652  | 1.412  | 1.799  | 1.786  | 1.988  | <b>1.492</b>  |
| BRxRevTPSS | 1.386  | 1.371  | 1.935  | 1.899  | 0.993  | 1.480  | 1.476  | 1.395  | 1.447  | 1.496  | 1.392  | 1.485  | 0.829  | 1.377  | 1.160  | 1.658  | 1.335  | 1.882  | 1.741  | 1.920  | <b>1.483</b>  |
| BRxTPSS    | 1.446  | 1.445  | 1.830  | 1.829  | 1.035  | 1.472  | 1.454  | 1.409  | 1.469  | 1.408  | 1.409  | 1.468  | 0.883  | 1.406  | 1.165  | 1.734  | 1.468  | 1.886  | 1.823  | 1.940  | <b>1.499</b>  |
| BRxVP86    | 1.470  | 1.470  | 2.048  | 2.095  |        |        |        |        |        |        |        |        |        |        |        |        |        |        |        |        |               |



|             |        |        |        |        |        |        |        |        |        |        |        |        |        |        |        |        |        |        |        |        |               |
|-------------|--------|--------|--------|--------|--------|--------|--------|--------|--------|--------|--------|--------|--------|--------|--------|--------|--------|--------|--------|--------|---------------|
| G96B95      | 2.807  | 2.845  | 3.724  | 3.666  | 2.943  | 3.587  | 3.567  | 3.850  | 3.514  | 3.279  | 3.543  | 3.589  | 2.391  | 4.074  | 2.856  | 3.707  | 3.135  | 3.783  | 3.731  | 3.889  | <b>3.424</b>  |
| G96BRC      | 2.822  | 2.825  | 3.376  | 3.383  | 2.587  | 3.230  | 3.340  | 3.334  | 3.332  | 3.334  | 3.329  | 3.282  | 2.176  | 3.658  | 2.687  | 3.416  | 3.035  | 3.635  | 3.267  | 3.588  | <b>3.182</b>  |
| G96KCIS     | 2.831  | 2.838  | 3.369  | 3.369  | 2.797  | 3.349  | 3.244  | 3.241  | 3.349  | 3.244  | 3.240  | 3.341  | 2.165  | 3.684  | 2.802  | 3.382  | 3.022  | 3.511  | 3.353  | 3.509  | <b>3.182</b>  |
| G96LYP      | 2.812  | 2.812  | 3.437  | 3.443  | 2.660  | 3.376  | 3.376  | 3.319  | 3.376  | 3.369  | 3.318  | 3.369  | 2.158  | 3.988  | 2.702  | 3.428  | 3.040  | 3.527  | 3.426  | 3.487  | <b>3.221</b>  |
| G96P86      | 2.764  | 2.766  | 3.348  | 3.357  | 2.681  | 3.046  | 3.048  | 3.045  | 3.060  | 3.054  | 3.022  | 3.053  | 2.176  | 3.606  | 2.639  | 3.215  | 3.017  | 3.394  | 3.251  | 3.397  | <b>3.047</b>  |
| G96PBE      | 2.766  | 2.769  | 3.369  | 3.362  | 2.579  | 3.117  | 3.115  | 3.118  | 3.116  | 3.119  | 3.120  | 3.114  | 2.148  | 3.456  | 2.688  | 3.372  | 3.020  | 3.394  | 3.249  | 3.450  | <b>3.072</b>  |
| G96PKZB     | 2.770  | 2.770  | 3.367  | 3.363  | 2.575  | 3.110  | 3.112  | 3.119  | 3.118  | 3.112  | 3.116  | 3.112  | 2.147  | 3.517  | 2.684  | 3.372  | 3.026  | 3.390  | 3.289  | 3.388  | <b>3.073</b>  |
| G96PL       | 2.766  | 2.765  | 3.362  | 3.359  | 2.628  | 3.111  | 3.101  | 3.083  | 3.112  | 3.102  | 3.086  | 3.108  | 2.147  | 3.568  | 2.689  | 3.381  | 2.998  | 3.421  | 3.257  | 3.386  | <b>3.071</b>  |
| G96PW91     | 2.768  | 2.766  | 3.364  | 3.366  | 2.537  | 3.115  | 3.115  | 3.112  | 3.114  | 3.110  | 3.113  | 3.109  | 2.151  | 3.464  | 2.682  | 3.369  | 3.045  | 3.385  | 3.247  | 3.401  | <b>3.067</b>  |
| G96RevTPSS  | 2.771  | 2.770  | 3.372  | 3.364  | 2.624  | 3.118  | 3.107  | 3.123  | 3.118  | 3.111  | 3.123  | 3.118  | 2.149  | 3.529  | 2.687  | 3.388  | 3.019  | 3.382  | 3.246  | 3.401  | <b>3.076</b>  |
| G96TPSS     | 2.767  | 2.770  | 3.371  | 3.368  | 2.580  | 3.105  | 3.113  | 3.120  | 3.115  | 3.111  | 3.120  | 3.113  | 2.151  | 3.473  | 2.685  | 3.369  | 3.022  | 3.389  | 3.249  | 3.390  | <b>3.069</b>  |
| G96VP86     | 2.777  | 2.778  | 3.353  | 3.355  | 2.690  | 3.064  | 3.056  | 3.039  | 3.059  | 3.052  | 3.045  | 3.053  | 2.178  | 3.552  | 2.636  | 3.218  | 3.019  | 3.383  | 3.243  | 3.450  | <b>3.050</b>  |
| G96VWN      | 2.794  | 2.791  | 3.255  | 3.259  | 2.597  | 3.069  | 3.077  | 3.076  | 3.070  | 3.072  | 3.091  | 3.071  | 2.149  | 3.405  | 2.679  | 3.222  | 2.981  | 3.308  | 3.248  | 3.384  | <b>3.030</b>  |
| G96VWN5     | 2.765  | 2.764  | 3.360  | 3.352  | 2.624  | 3.113  | 3.092  | 3.082  | 3.083  | 3.092  | 3.084  | 3.111  | 2.144  | 3.549  | 2.689  | 3.379  | 2.992  | 3.409  | 3.260  | 3.388  | <b>3.067</b>  |
| LGB95       | -0.082 | -0.090 | 0.031  | 0.031  | -0.166 | 0.019  | 0.000  | -0.026 | 0.019  | -0.001 | -0.026 | 0.022  | -0.266 | 0.037  | -0.113 | -0.009 | -0.051 | 0.028  | 0.030  | 0.033  | <b>-0.029</b> |
| LGBRC       | -0.007 | -0.015 | 0.118  | 0.118  | -0.098 | 0.142  | 0.096  | 0.073  | 0.140  | 0.083  | 0.064  | 0.156  | -0.253 | 0.122  | -0.050 | 0.108  | 0.047  | 0.123  | 0.115  | 0.125  | <b>0.060</b>  |
| LGKCIS      | -0.053 | -0.060 | 0.049  | 0.050  | -0.132 | 0.071  | 0.028  | 0.024  | 0.071  | 0.025  | 0.023  | 0.088  | -0.260 | 0.066  | -0.087 | 0.052  | -0.003 | 0.050  | 0.043  | 0.049  | <b>0.005</b>  |
| LGLYP       | -0.320 | -0.322 | -0.282 | -0.282 | -0.371 | -0.273 | -0.289 | -0.290 | -0.274 | -0.291 | -0.292 | -0.258 | -0.459 | -0.271 | -0.339 | -0.279 | -0.298 | -0.284 | -0.283 | -0.283 | <b>-0.302</b> |
| LGP86       | -0.220 | -0.225 | -0.130 | -0.130 | -0.277 | -0.094 | -0.171 | -0.187 | -0.111 | -0.174 | -0.189 | -0.077 | -0.330 | -0.088 | -0.250 | -0.160 | -0.172 | -0.152 | -0.144 | -0.141 | <b>-0.171</b> |
| LGPBE       | 0.035  | 0.016  | 0.181  | 0.181  | -0.067 | 0.209  | 0.140  | 0.132  | 0.207  | 0.138  | 0.133  | 0.227  | -0.191 | 0.227  | -0.016 | 0.172  | 0.085  | 0.177  | 0.176  | 0.177  | <b>0.117</b>  |
| LGPKZB      | 0.045  | 0.024  | 0.189  | 0.189  | -0.056 | 0.217  | 0.148  | 0.140  | 0.216  | 0.147  | 0.142  | 0.234  | -0.180 | 0.233  | -0.004 | 0.187  | 0.098  | 0.200  | 0.179  | 0.187  | <b>0.127</b>  |
| LGPL        | 0.115  | 0.107  | 0.219  | 0.219  | -0.008 | 0.256  | 0.209  | 0.185  | 0.255  | 0.208  | 0.185  | 0.264  | -0.100 | 0.268  | 0.050  | 0.254  | 0.141  | 0.231  | 0.214  | 0.216  | <b>0.174</b>  |
| LGPW91      | 0.009  | -0.003 | 0.146  | 0.146  | -0.084 | 0.169  | 0.108  | 0.095  | 0.168  | 0.107  | 0.095  | 0.192  | -0.207 | 0.180  | -0.040 | 0.134  | 0.065  | 0.146  | 0.139  | 0.140  | <b>0.085</b>  |
| LGRRevTPSS  | -0.012 | -0.024 | 0.120  | 0.120  | -0.104 | 0.145  | 0.072  | 0.056  | 0.141  | 0.075  | 0.054  | 0.161  | -0.220 | 0.150  | -0.059 | 0.093  | 0.040  | 0.114  | 0.115  | 0.118  | <b>0.058</b>  |
| LGTPSS      | 0.042  | 0.022  | 0.187  | 0.187  | -0.063 | 0.219  | 0.146  | 0.138  | 0.214  | 0.146  | 0.143  | 0.236  | -0.186 | 0.232  | -0.007 | 0.185  | 0.096  | 0.187  | 0.175  | 0.184  | <b>0.124</b>  |
| LGV86       | -0.217 | -0.223 | -0.129 | -0.128 | -0.276 | -0.100 | -0.161 | -0.176 | -0.109 | -0.169 | -0.186 | -0.082 | -0.329 | -0.084 | -0.238 | -0.157 | -0.170 | -0.145 | -0.137 | -0.138 | <b>-0.168</b> |
| LGVWN       | 0.082  | 0.068  | 0.171  | 0.171  | -0.036 | 0.190  | 0.144  | 0.128  | 0.189  | 0.140  | 0.131  | 0.198  | -0.135 | 0.208  | 0.023  | 0.172  | 0.094  | 0.174  | 0.164  | 0.165  | <b>0.122</b>  |
| LGVWN5      | 0.117  | 0.109  | 0.221  | 0.221  | -0.004 | 0.257  | 0.210  | 0.188  | 0.256  | 0.210  | 0.186  | 0.267  | -0.095 | 0.271  | 0.053  | 0.259  | 0.143  | 0.233  | 0.232  | 0.218  | <b>0.178</b>  |
| mPWB95      | 0.098  | 0.098  | 0.159  | 0.159  | -0.041 | 0.145  | 0.143  | 0.143  | 0.145  | 0.143  | 0.143  | 0.146  | -0.125 | 0.160  | 0.083  | 0.155  | 0.153  | 0.160  | 0.158  | 0.160  | <b>0.119</b>  |
| mPWBRC      | 0.272  | 0.266  | 0.458  | 0.458  | 0.138  | 0.452  | 0.414  | 0.397  | 0.451  | 0.413  | 0.396  | 0.452  | -0.047 | 0.416  | 0.209  | 0.485  | 0.341  | 0.498  | 0.457  | 0.495  | <b>0.371</b>  |
| mPWKCIS     | 0.247  | 0.239  | 0.410  | 0.410  | 0.109  | 0.398  | 0.370  | 0.350  | 0.397  | 0.370  | 0.347  | 0.402  | -0.034 | 0.383  | 0.181  | 0.436  | 0.300  | 0.438  | 0.404  | 0.433  | <b>0.329</b>  |
| mPWLYP      | -0.106 | -0.108 | -0.012 | -0.012 | -0.189 | -0.009 | -0.035 | -0.039 | -0.010 | -0.037 | -0.041 | 0.005  | -0.329 | 0.000  | -0.139 | 0.003  | -0.060 | -0.008 | -0.013 | -0.007 | <b>-0.057</b> |
| mPWP86      | 0.178  | 0.166  | 0.424  | 0.424  | 0.044  | 0.392  | 0.300  | 0.272  | 0.392  | 0.298  | 0.271  | 0.421  | -0.110 | 0.365  | 0.111  | 0.397  | 0.269  | 0.441  | 0.410  | 0.440  | <b>0.295</b>  |
| mPWPBE      | 0.360  | 0.354  | 0.517  | 0.517  | 0.212  | 0.538  | 0.495  | 0.470  | 0.537  | 0.495  | 0.467  | 0.538  | 0.043  | 0.476  | 0.289  | 0.570  | 0.401  | 0.551  | 0.516  | 0.540  | <b>0.444</b>  |
| mPWPKZB     | 0.363  | 0.359  | 0.520  | 0.520  | 0.216  | 0.537  | 0.498  | 0.470  | 0.536  | 0.501  | 0.471  | 0.537  | 0.046  | 0.479  | 0.292  | 0.569  | 0.406  | 0.554  | 0.521  | 0.543  | <b>0.447</b>  |
| mPWPL       | 0.354  | 0.344  | 0.484  | 0.484  | 0.202  | 0.502  | 0.464  | 0.437  | 0.502  | 0.462  | 0.434  | 0.504  | 0.049  | 0.443  | 0.287  | 0.543  | 0.380  | 0.518  | 0.486  | 0.508  | <b>0.419</b>  |
| mPWPW91     | 0.351  | 0.343  | 0.511  | 0.511  | 0.205  | 0.521  | 0.485  | 0.455  | 0.523  | 0.483  | 0.454  | 0.527  | 0.035  | 0.470  | 0.280  | 0.557  | 0.392  | 0.545  | 0.509  | 0.532  | <b>0.434</b>  |
| mPWRRevTPSS | 0.328  | 0.315  | 0.491  | 0.491  | 0.187  | 0.497  | 0.452  | 0.420  | 0.496  | 0.451  | 0.420  | 0.501  | 0.021  | 0.452  | 0.261  | 0.519  | 0.375  | 0.519  | 0.489  | 0.510  | <b>0.410</b>  |
| mPWTPSS     | 0.362  | 0.357  | 0.522  | 0.522  | 0.215  | 0.539  | 0.500  | 0.473  | 0.538  | 0.500  | 0.473  | 0.540  | 0.045  | 0.481  | 0.292  | 0.574  | 0.406  | 0.554  | 0.520  | 0.543  | <b>0.448</b>  |
| mPWVP86     | 0.180  | 0.169  | 0.427  | 0.427  | 0.047  | 0.398  | 0.303  | 0.275  | 0.393  | 0.301  | 0.274  | 0.426  | -0.104 | 0.369  | 0.117  | 0.399  | 0.272  | 0.449  | 0.415  | 0.448  | <b>0.299</b>  |
| mPWVWN      | 0.323  | 0.316  | 0.440  | 0.440  | 0.181  | 0.431  | 0.406  | 0.392  | 0.428  | 0.407  | 0.391  | 0.432  | 0.027  | 0.409  | 0.262  | 0.476  | 0.355  | 0.474  | 0.439  | 0.454  | <b>0.374</b>  |
| mPWVWN5     | 0.356  | 0.345  | 0.486  | 0.486  | 0.203  | 0.503  | 0.465  | 0.439  | 0.502  | 0.463  | 0.437  | 0.504  | 0.050  | 0.444  | 0.288  | 0.545  | 0.381  | 0.520  | 0.489  | 0.509  | <b>0.421</b>  |
| OB95        | 0.304  | 0.304  | 0.402  | 0.402  | 0.228  | 0.411  | 0.410  | 0.367  | 0.411  | 0.410  | 0.367  | 0.448  | 0.102  | 0.373  | 0.295  | 0.432  | 0.362  | 0.396  | 0.390  | 0.334  | <b>0.357</b>  |
| OBRC        | 0.478  | 0.474  | 0.711  | 0.711  | 0.329  | 0.709  | 0.695  | 0.672  | 0.708  | 0.695  | 0.673  | 0.709  | 0.205  | 0.633  | 0.407  | 0.763  | 0.566  | 0.781  | 0.706  | 0.752  | <b>0.619</b>  |
| OKCIS       | 0.471  | 0.466  | 0.686  | 0.686  | 0.321  | 0.688  | 0.667  | 0.647  | 0.687  | 0.666  | 0.647  | 0.692  | 0.208  | 0.609  | 0.408  | 0.725  | 0.547  | 0.717  | 0.682  | 0.724  | <b>0.597</b>  |
| OLYP        | 0.257  | 0.253  | 0.444  | 0.444  | 0.122  | 0.445  | 0.424  | 0.409  | 0.445  | 0.423  | 0.409  | 0.446  | -0.027 | 0.383  | 0.207  | 0.494  | 0.333  | 0.475  | 0.454  | 0.460  | <b>0.365</b>  |
| OP86        | 0.559  | 0.553  | 0.877  | 0.875  | 0.400  | 0.775  | 0.768  | 0.713  | 0.775  | 0.768  | 0.712  | 0.803  | 0.295  | 0.760  | 0.529  | 0.942  | 0.650  | 0.943  | 0.803  | 0.904  | <b>0.720</b>  |
| OPBE        | 0.535  | 0.531  | 0.761  | 0.761  | 0.379  | 0.729  | 0.707  | 0.684  | 0.728  | 0.706  | 0.684  | 0.727  | 0.275  | 0.668  | 0.481  | 0.833  | 0.599  | 0.822  | 0.725  | 0.822  | <b>0.658</b>  |
| OPKZB       | 0.538  | 0.534  | 0.764  | 0.764  | 0.382  | 0.730  | 0.709  | 0.687  | 0.730  | 0.709  | 0.687  | 0.732  | 0.276  | 0.672  | 0.484  | 0.833  | 0.603  | 0.820  | 0.728  | 0.831  | <b>0.661</b>  |
| OPL         | 0.523  | 0.515  | 0.708  | 0.708  | 0.361  | 0.713  | 0.692  | 0.672  | 0.712  | 0.692  | 0.672  | 0.714  | 0.246  | 0.635  | 0.468  | 0.755  | 0.584  | 0.771  | 0.705  | 0.731  | <b>0.629</b>  |
| OPW91       | 0.533  | 0.529  | 0.725  | 0.725  | 0.377  | 0.726  | 0.702  | 0.682  | 0.726  | 0.702  | 0.681  | 0.726  | 0.272  | 0.661  | 0.479  | 0.829  | 0.599  | 0.820  | 0.721  | 0.806  | <b>0.651</b>  |
| ORRevTPSS   | 0.527  | 0.522  | 0.718  | 0.718  | 0.368  | 0.720  | 0.696  | 0.675  | 0.719  | 0.696  | 0.675  | 0.718  | 0.260  | 0.654  | 0.471  | 0.815  | 0.591  | 0.804  | 0.713  | 0.798  | <b>0.643</b>  |
| OTPSS       | 0.538  | 0.534  | 0.765  | 0.765  | 0.382  | 0.732  | 0.710  | 0.688  | 0.732  | 0.710  | 0.688  | 0.734  | 0.275  | 0.673  | 0.483  | 0.835  | 0.603  | 0.825  | 0.731  | 0.826  | <b>0.661</b>  |
| OVP86       | 0.560  | 0.554  | 0.878  | 0.877  | 0.418  | 0.776  | 0.768  | 0.713  | 0.776  | 0.768  | 0.713  | 0.804  | 0.297  | 0.760  | 0.530  | 0.926  | 0.649  | 0.944  | 0.804  | 0.921  | <b>0.722</b>  |
| OVWN        | 0.499  | 0.493  | 0.667  | 0.667  | 0.346  | 0.661  | 0      |        |        |        |        |        |        |        |        |        |        |        |        |        |               |

|             |        |        |        |        |        |        |        |        |        |        |        |        |        |        |        |        |        |        |        |        |               |
|-------------|--------|--------|--------|--------|--------|--------|--------|--------|--------|--------|--------|--------|--------|--------|--------|--------|--------|--------|--------|--------|---------------|
| PBEBRC      | -0.048 | -0.052 | 0.036  | 0.036  | -0.135 | 0.041  | 0.016  | 0.008  | 0.039  | 0.014  | 0.007  | 0.051  | -0.266 | 0.031  | -0.087 | 0.042  | -0.010 | 0.044  | 0.035  | 0.040  | <b>-0.008</b> |
| PBECICIS    | -0.087 | -0.090 | -0.005 | -0.005 | -0.164 | 0.000  | -0.017 | -0.026 | 0.000  | -0.017 | -0.028 | 0.011  | -0.274 | 0.014  | -0.121 | -0.002 | -0.048 | -0.004 | -0.006 | -0.004 | <b>-0.044</b> |
| PBELYP      | -0.307 | -0.308 | -0.265 | -0.265 | -0.359 | -0.259 | -0.274 | -0.275 | -0.260 | -0.276 | -0.276 | -0.246 | -0.448 | -0.252 | -0.325 | -0.260 | -0.284 | -0.266 | -0.265 | -0.264 | <b>-0.287</b> |
| PBEP86      | -0.220 | -0.222 | -0.167 | -0.167 | -0.274 | -0.153 | -0.182 | -0.187 | -0.155 | -0.184 | -0.189 | -0.137 | -0.366 | -0.161 | -0.246 | -0.174 | -0.194 | -0.174 | -0.172 | -0.170 | <b>-0.195</b> |
| PBEPBE      | -0.034 | -0.039 | 0.054  | 0.054  | -0.122 | 0.055  | 0.024  | 0.012  | 0.055  | 0.023  | 0.011  | 0.069  | -0.229 | 0.064  | -0.076 | 0.053  | -0.005 | 0.057  | 0.050  | 0.052  | <b>0.006</b>  |
| PBEPKZB     | -0.026 | -0.031 | 0.060  | 0.060  | -0.115 | 0.062  | 0.031  | 0.017  | 0.060  | 0.030  | 0.016  | 0.079  | -0.222 | 0.072  | -0.069 | 0.062  | 0.003  | 0.063  | 0.056  | 0.059  | <b>0.013</b>  |
| PBEPL       | 0.035  | 0.031  | 0.106  | 0.106  | -0.062 | 0.110  | 0.087  | 0.078  | 0.109  | 0.087  | 0.078  | 0.117  | -0.171 | 0.125  | -0.009 | 0.122  | 0.057  | 0.114  | 0.105  | 0.105  | <b>0.067</b>  |
| PBEPW91     | -0.049 | -0.054 | 0.039  | 0.039  | -0.133 | 0.039  | 0.011  | -0.004 | 0.038  | 0.010  | -0.006 | 0.052  | -0.241 | 0.045  | -0.088 | 0.038  | -0.019 | 0.038  | 0.031  | 0.038  | <b>-0.009</b> |
| PBERevTPSS  | -0.060 | -0.065 | 0.021  | 0.021  | -0.141 | 0.027  | -0.003 | -0.014 | 0.026  | -0.004 | -0.016 | 0.041  | -0.248 | 0.031  | -0.097 | 0.025  | -0.030 | 0.023  | 0.016  | 0.020  | <b>-0.021</b> |
| PBETPSS     | -0.027 | -0.033 | 0.059  | 0.059  | -0.117 | 0.062  | 0.031  | 0.018  | 0.060  | 0.030  | 0.016  | 0.079  | -0.224 | 0.071  | -0.070 | 0.062  | 0.002  | 0.062  | 0.056  | 0.058  | <b>0.013</b>  |
| PBEVP86     | -0.218 | -0.221 | -0.165 | -0.165 | -0.273 | -0.152 | -0.179 | -0.186 | -0.153 | -0.182 | -0.187 | -0.135 | -0.365 | -0.159 | -0.244 | -0.173 | -0.193 | -0.172 | -0.170 | -0.169 | <b>-0.193</b> |
| PBEVWN      | 0.005  | 0.002  | 0.069  | 0.069  | -0.083 | 0.072  | 0.052  | 0.043  | 0.071  | 0.050  | 0.042  | 0.080  | -0.188 | 0.088  | -0.034 | 0.084  | 0.027  | 0.073  | 0.067  | 0.066  | <b>0.033</b>  |
| PBEVWN5     | 0.036  | 0.032  | 0.107  | 0.107  | -0.060 | 0.111  | 0.088  | 0.080  | 0.110  | 0.088  | 0.079  | 0.118  | -0.169 | 0.127  | -0.008 | 0.124  | 0.059  | 0.115  | 0.107  | 0.106  | <b>0.068</b>  |
| PBEhB95     | -0.110 | -0.111 | -0.051 | -0.050 | -0.213 | -0.041 | -0.093 | -0.075 | -0.041 | -0.093 | -0.076 | -0.013 | -0.316 | -0.021 | -0.188 | -0.076 | -0.105 | -0.053 | -0.062 | -0.048 | <b>-0.092</b> |
| PBEhBRC     | -0.049 | -0.052 | 0.029  | 0.029  | -0.136 | 0.034  | 0.012  | 0.005  | 0.032  | 0.011  | 0.004  | 0.044  | -0.264 | 0.028  | -0.088 | 0.041  | -0.013 | 0.036  | 0.028  | 0.033  | <b>-0.012</b> |
| PBEhKCIS    | -0.084 | -0.089 | -0.008 | -0.008 | -0.164 | -0.004 | -0.022 | -0.030 | -0.005 | -0.023 | -0.032 | 0.007  | -0.271 | 0.013  | -0.120 | -0.003 | -0.051 | -0.007 | -0.009 | -0.006 | <b>-0.046</b> |
| PBEhLYP     | -0.302 | -0.303 | -0.261 | -0.261 | -0.355 | -0.253 | -0.268 | -0.268 | -0.255 | -0.269 | -0.270 | -0.240 | -0.444 | -0.246 | -0.319 | -0.253 | -0.279 | -0.262 | -0.260 | -0.260 | <b>-0.281</b> |
| PBEhP86     | -0.218 | -0.221 | -0.165 | -0.165 | -0.272 | -0.154 | -0.180 | -0.184 | -0.155 | -0.182 | -0.187 | -0.138 | -0.363 | -0.159 | -0.242 | -0.172 | -0.193 | -0.173 | -0.171 | -0.170 | <b>-0.193</b> |
| PBEhPBE     | -0.039 | -0.044 | 0.045  | 0.045  | -0.125 | 0.045  | 0.016  | 0.007  | 0.043  | 0.014  | 0.006  | 0.059  | -0.231 | 0.062  | -0.079 | 0.046  | -0.009 | 0.043  | 0.043  | 0.045  | <b>0.000</b>  |
| PBEhPKZB    | -0.031 | -0.036 | 0.052  | 0.052  | -0.119 | 0.051  | 0.024  | 0.013  | 0.050  | 0.022  | 0.012  | 0.065  | -0.224 | 0.069  | -0.071 | 0.054  | -0.002 | 0.051  | 0.049  | 0.051  | <b>0.007</b>  |
| PBEhPL      | 0.032  | 0.028  | 0.097  | 0.097  | -0.061 | 0.100  | 0.082  | 0.073  | 0.100  | 0.082  | 0.072  | 0.109  | -0.175 | 0.118  | -0.009 | 0.117  | 0.054  | 0.103  | 0.096  | 0.096  | <b>0.061</b>  |
| PBEhPW91    | -0.053 | -0.058 | 0.026  | 0.026  | -0.136 | 0.030  | -0.001 | -0.009 | 0.028  | -0.003 | -0.011 | 0.045  | -0.242 | 0.043  | -0.091 | 0.031  | -0.023 | 0.026  | 0.022  | 0.025  | <b>-0.016</b> |
| PBEhRevTPSS | -0.063 | -0.067 | 0.012  | 0.012  | -0.144 | 0.016  | -0.011 | -0.019 | 0.015  | -0.015 | -0.021 | 0.030  | -0.247 | 0.031  | -0.099 | 0.017  | -0.033 | 0.012  | 0.008  | 0.011  | <b>-0.028</b> |
| PBEhTPSS    | -0.032 | -0.037 | 0.051  | 0.052  | -0.120 | 0.052  | 0.023  | 0.013  | 0.050  | 0.021  | 0.012  | 0.066  | -0.226 | 0.069  | -0.072 | 0.054  | -0.003 | 0.050  | 0.049  | 0.051  | <b>0.006</b>  |
| PBEhVP86    | -0.216 | -0.219 | -0.164 | -0.164 | -0.270 | -0.152 | -0.178 | -0.183 | -0.154 | -0.180 | -0.185 | -0.136 | -0.361 | -0.158 | -0.239 | -0.170 | -0.192 | -0.171 | -0.169 | -0.168 | <b>-0.192</b> |
| PBEhVWN     | 0.002  | -0.001 | 0.063  | 0.063  | -0.085 | 0.068  | 0.045  | 0.039  | 0.067  | 0.044  | 0.038  | 0.075  | -0.190 | 0.083  | -0.035 | 0.082  | 0.024  | 0.065  | 0.061  | 0.060  | <b>0.028</b>  |
| PBEhVWN5    | 0.033  | 0.030  | 0.099  | 0.099  | -0.060 | 0.102  | 0.083  | 0.074  | 0.101  | 0.083  | 0.073  | 0.109  | -0.173 | 0.120  | -0.008 | 0.117  | 0.055  | 0.105  | 0.098  | 0.097  | <b>0.062</b>  |
| PKZBB95     | 0.040  | 0.039  | 0.132  | 0.132  | -0.078 | 0.136  | 0.134  | 0.134  | 0.136  | 0.134  | 0.134  | 0.106  | -0.141 | 0.122  | 0.049  | 0.122  | 0.101  | 0.132  | 0.132  | 0.133  | <b>0.091</b>  |
| PKZBBRC     | 0.093  | 0.091  | 0.215  | 0.215  | -0.012 | 0.201  | 0.186  | 0.181  | 0.200  | 0.185  | 0.180  | 0.205  | -0.136 | 0.182  | 0.049  | 0.222  | 0.153  | 0.224  | 0.219  | 0.224  | <b>0.154</b>  |
| PKZBKICIS   | 0.079  | 0.076  | 0.182  | 0.182  | -0.021 | 0.169  | 0.153  | 0.149  | 0.168  | 0.152  | 0.149  | 0.176  | -0.136 | 0.164  | 0.039  | 0.190  | 0.126  | 0.188  | 0.184  | 0.187  | <b>0.128</b>  |
| PKZBLYP     | -0.086 | -0.087 | -0.012 | -0.012 | -0.174 | -0.025 | -0.033 | -0.034 | -0.026 | -0.034 | -0.035 | -0.018 | -0.295 | -0.029 | -0.118 | -0.003 | -0.044 | -0.009 | -0.010 | -0.011 | <b>-0.055</b> |
| PKZBP86     | 0.023  | 0.020  | 0.106  | 0.106  | -0.069 | 0.100  | 0.083  | 0.076  | 0.100  | 0.082  | 0.075  | 0.106  | -0.189 | 0.097  | -0.016 | 0.111  | 0.059  | 0.112  | 0.107  | 0.113  | <b>0.060</b>  |
| PKZBPBE     | 0.116  | 0.114  | 0.225  | 0.225  | 0.010  | 0.210  | 0.196  | 0.187  | 0.210  | 0.196  | 0.186  | 0.215  | -0.096 | 0.208  | 0.074  | 0.238  | 0.165  | 0.232  | 0.227  | 0.232  | <b>0.168</b>  |
| PKZBPKZB    | 0.121  | 0.118  | 0.229  | 0.229  | 0.014  | 0.214  | 0.200  | 0.191  | 0.213  | 0.199  | 0.190  | 0.219  | -0.094 | 0.212  | 0.078  | 0.242  | 0.170  | 0.235  | 0.231  | 0.235  | <b>0.172</b>  |
| PKZBPL      | 0.142  | 0.140  | 0.249  | 0.249  | 0.033  | 0.235  | 0.221  | 0.214  | 0.234  | 0.220  | 0.213  | 0.239  | -0.079 | 0.239  | 0.098  | 0.263  | 0.191  | 0.254  | 0.252  | 0.252  | <b>0.193</b>  |
| PKZBPW91    | 0.110  | 0.107  | 0.215  | 0.215  | 0.004  | 0.202  | 0.188  | 0.178  | 0.202  | 0.187  | 0.177  | 0.208  | -0.103 | 0.200  | 0.065  | 0.229  | 0.158  | 0.222  | 0.217  | 0.222  | <b>0.160</b>  |
| PKZBRevTPSS | 0.102  | 0.100  | 0.204  | 0.205  | -0.003 | 0.193  | 0.178  | 0.169  | 0.192  | 0.177  | 0.168  | 0.199  | -0.108 | 0.190  | 0.059  | 0.216  | 0.147  | 0.211  | 0.207  | 0.210  | <b>0.151</b>  |
| PKZBTPSS    | 0.120  | 0.118  | 0.230  | 0.230  | 0.014  | 0.215  | 0.201  | 0.193  | 0.215  | 0.200  | 0.192  | 0.221  | -0.094 | 0.213  | 0.078  | 0.242  | 0.170  | 0.237  | 0.232  | 0.236  | <b>0.173</b>  |
| PKZBVP86    | 0.023  | 0.021  | 0.107  | 0.107  | -0.069 | 0.101  | 0.084  | 0.077  | 0.100  | 0.083  | 0.076  | 0.108  | -0.188 | 0.098  | -0.016 | 0.112  | 0.059  | 0.113  | 0.108  | 0.114  | <b>0.061</b>  |
| PKZBVWN     | 0.119  | 0.117  | 0.213  | 0.213  | 0.012  | 0.201  | 0.187  | 0.180  | 0.200  | 0.186  | 0.179  | 0.205  | -0.089 | 0.202  | 0.078  | 0.227  | 0.161  | 0.217  | 0.216  | 0.215  | <b>0.162</b>  |
| PKZBVWN5    | 0.143  | 0.140  | 0.250  | 0.250  | 0.033  | 0.235  | 0.221  | 0.214  | 0.234  | 0.221  | 0.213  | 0.239  | -0.078 | 0.240  | 0.098  | 0.263  | 0.191  | 0.255  | 0.253  | 0.253  | <b>0.193</b>  |
| PW91B95     | -0.159 | -0.160 | -0.104 | -0.104 | -0.241 | -0.114 | -0.124 | -0.119 | -0.115 | -0.124 | -0.119 | -0.070 | -0.374 | -0.110 | -0.195 | -0.101 | -0.153 | -0.097 | -0.105 | -0.077 | <b>-0.138</b> |
| PW91BRC     | -0.083 | -0.085 | -0.013 | -0.013 | -0.172 | -0.012 | -0.029 | -0.035 | -0.013 | -0.031 | -0.036 | -0.002 | -0.296 | -0.026 | -0.123 | -0.004 | -0.051 | -0.004 | -0.011 | -0.009 | <b>-0.052</b> |
| PW91KCIS    | -0.120 | -0.122 | -0.045 | -0.045 | -0.197 | -0.043 | -0.062 | -0.067 | -0.044 | -0.063 | -0.068 | -0.032 | -0.306 | -0.045 | -0.153 | -0.037 | -0.087 | -0.039 | -0.046 | -0.038 | <b>-0.083</b> |
| PW91LYP     | -0.313 | -0.314 | -0.269 | -0.269 | -0.368 | -0.265 | -0.279 | -0.279 | -0.266 | -0.281 | -0.281 | -0.252 | -0.463 | -0.264 | -0.332 | -0.264 | -0.289 | -0.268 | -0.269 | -0.267 | <b>-0.292</b> |
| PW91P86     | -0.236 | -0.237 | -0.189 | -0.189 | -0.293 | -0.181 | -0.202 | -0.205 | -0.183 | -0.204 | -0.207 | -0.166 | -0.391 | -0.199 | -0.264 | -0.192 | -0.213 | -0.189 | -0.191 | -0.187 | <b>-0.216</b> |
| PW91PBE     | -0.081 | -0.083 | -0.014 | -0.014 | -0.164 | -0.014 | -0.034 | -0.040 | -0.015 | -0.036 | -0.042 | -0.004 | -0.273 | -0.022 | -0.119 | -0.006 | -0.054 | -0.007 | -0.015 | -0.011 | <b>-0.052</b> |
| PW91PKZB    | -0.073 | -0.076 | -0.008 | -0.007 | -0.159 | -0.010 | -0.028 | -0.034 | -0.011 | -0.029 | -0.035 | 0.001  | -0.266 | -0.014 | -0.112 | 0.001  | -0.048 | -0.001 | -0.008 | -0.004 | <b>-0.046</b> |
| PW91PL      | -0.016 | -0.018 | 0.043  | 0.043  | -0.107 | 0.042  | 0.028  | 0.025  | 0.041  | 0.027  | 0.024  | 0.050  | -0.216 | 0.051  | -0.054 | 0.061  | 0.008  | 0.051  | 0.044  | 0.044  | <b>0.009</b>  |
| PW91PW91    | -0.092 | -0.095 | -0.027 | -0.027 | -0.174 | -0.027 | -0.047 | -0.053 | -0.028 | -0.048 | -0.054 | -0.014 | -0.283 | -0.035 | -0.129 | -0.023 | -0.066 | -0.021 | -0.027 | -0.026 | <b>-0.065</b> |
| PW91RevTPSS | -0.099 | -0.102 | -0.035 | -0.035 | -0.179 | -0.035 | -0.055 | -0.060 | -0.035 | -0.056 | -0.061 | -0.023 | -0.286 | -0.042 | -0.135 | -0.030 | -0.072 | -0.032 | -0.035 | -0.032 | <b>-0.072</b> |
| PW91TPSS    | -0.074 | -0.077 | -0.007 | -0.007 | -0.159 | -0.009 | -0.028 | -0.034 | -0.010 | -0.029 | -0.035 | 0.002  | -0.267 | -0.014 | -0.112 | 0.001  | -0.048 | -0.001 | -0.008 | -0.004 | <b>-0.046</b> |
| PW91VP86    | -0.234 | -0.236 | -0.188 | -0.188 | -0.292 | -0.180 | -0.201 | -0.204 | -0.181 | -0.203 | -0.206 | -0.165 | -0.390 | -0.197 | -0.262 | -0.190 | -0.212 | -0.188 | -0.190 | -0.186 | <b>-0.215</b> |
| PW91VWN     | -0.040 | -0.042 | 0.012  | 0.012  | -0.129 | 0.013  | -0.001 | -0.007 | 0.012  | -0.003 | -0.008 | 0.021  | -0.231 | 0.024  | -0.077 | 0.030  | -0.020 | 0.017  | 0.012  | 0.011  | <b>-0.020</b> |
| PW91VWN5    |        |        |        |        |        |        |        |        |        |        |        |        |        |        |        |        |        |        |        |        |               |

|                |        |        |        |        |        |        |        |        |        |        |        |        |        |        |        |        |        |        |        |        |               |
|----------------|--------|--------|--------|--------|--------|--------|--------|--------|--------|--------|--------|--------|--------|--------|--------|--------|--------|--------|--------|--------|---------------|
| RevTPSSKCIS    | 0.149  | 0.143  | 0.243  | 0.243  | 0.028  | 0.243  | 0.213  | 0.198  | 0.241  | 0.212  | 0.198  | 0.251  | -0.087 | 0.245  | 0.092  | 0.265  | 0.181  | 0.251  | 0.240  | 0.246  | <b>0.190</b>  |
| RevTPSSLYP     | -0.200 | -0.201 | -0.147 | -0.147 | -0.267 | -0.148 | -0.167 | -0.169 | -0.150 | -0.169 | -0.171 | -0.135 | -0.371 | -0.143 | -0.229 | -0.144 | -0.173 | -0.147 | -0.149 | -0.146 | <b>-0.179</b> |
| RevTPSSP86     | 0.039  | 0.033  | 0.145  | 0.144  | -0.081 | 0.135  | 0.102  | 0.088  | 0.136  | 0.100  | 0.087  | 0.149  | -0.175 | 0.140  | -0.029 | 0.126  | 0.084  | 0.141  | 0.138  | 0.143  | <b>0.082</b>  |
| RevTPSSPBE     | 0.243  | 0.224  | 0.364  | 0.364  | 0.099  | 0.332  | 0.289  | 0.278  | 0.330  | 0.288  | 0.278  | 0.353  | -0.003 | 0.350  | 0.191  | 0.379  | 0.262  | 0.398  | 0.352  | 0.364  | <b>0.287</b>  |
| RevTPSSPKZB    | 0.248  | 0.229  | 0.365  | 0.365  | 0.103  | 0.338  | 0.290  | 0.281  | 0.337  | 0.291  | 0.281  | 0.373  | 0.005  | 0.354  | 0.194  | 0.399  | 0.265  | 0.401  | 0.354  | 0.369  | <b>0.292</b>  |
| RevTPSSPL      | 0.262  | 0.257  | 0.360  | 0.360  | 0.125  | 0.362  | 0.325  | 0.312  | 0.361  | 0.324  | 0.310  | 0.366  | 0.005  | 0.351  | 0.193  | 0.406  | 0.277  | 0.379  | 0.353  | 0.360  | <b>0.302</b>  |
| RevTPSSPW91    | 0.231  | 0.216  | 0.350  | 0.350  | 0.090  | 0.322  | 0.281  | 0.272  | 0.321  | 0.281  | 0.271  | 0.326  | -0.019 | 0.345  | 0.182  | 0.366  | 0.255  | 0.384  | 0.346  | 0.349  | <b>0.276</b>  |
| RevTPSSRevTPSS | 0.205  | 0.201  | 0.337  | 0.337  | 0.077  | 0.305  | 0.269  | 0.260  | 0.306  | 0.269  | 0.258  | 0.311  | -0.033 | 0.330  | 0.160  | 0.348  | 0.242  | 0.369  | 0.331  | 0.340  | <b>0.261</b>  |
| RevTPSSTPSS    | 0.247  | 0.227  | 0.366  | 0.366  | 0.101  | 0.339  | 0.291  | 0.282  | 0.338  | 0.292  | 0.281  | 0.374  | 0.000  | 0.354  | 0.194  | 0.400  | 0.264  | 0.401  | 0.354  | 0.369  | <b>0.292</b>  |
| RevTPSSVP86    | 0.041  | 0.035  | 0.147  | 0.148  | -0.079 | 0.138  | 0.104  | 0.091  | 0.137  | 0.102  | 0.089  | 0.152  | -0.173 | 0.144  | -0.027 | 0.128  | 0.086  | 0.144  | 0.142  | 0.145  | <b>0.085</b>  |
| RevTPSSVWN     | 0.226  | 0.221  | 0.295  | 0.295  | 0.096  | 0.312  | 0.271  | 0.269  | 0.310  | 0.269  | 0.268  | 0.317  | -0.014 | 0.305  | 0.163  | 0.346  | 0.237  | 0.324  | 0.293  | 0.293  | <b>0.255</b>  |
| RevTPSSVWN5    | 0.263  | 0.259  | 0.362  | 0.362  | 0.127  | 0.363  | 0.327  | 0.313  | 0.362  | 0.326  | 0.312  | 0.367  | 0.006  | 0.353  | 0.194  | 0.408  | 0.279  | 0.387  | 0.355  | 0.365  | <b>0.305</b>  |
| SB95           | -0.642 | -0.643 | -0.637 | -0.637 | -0.632 | -0.597 | -0.615 | -0.629 | -0.600 | -0.619 | -0.633 | -0.583 | -0.707 | -0.632 | -0.639 | -0.645 | -0.647 | -0.647 | -0.643 | -0.645 | <b>-0.634</b> |
| SBRC           | -0.564 | -0.565 | -0.554 | -0.554 | -0.595 | -0.543 | -0.567 | -0.570 | -0.546 | -0.571 | -0.573 | -0.517 | -0.656 | -0.575 | -0.576 | -0.560 | -0.562 | -0.557 | -0.559 | -0.560 | <b>-0.566</b> |
| SKCIS          | -0.601 | -0.604 | -0.594 | -0.594 | -0.621 | -0.577 | -0.601 | -0.605 | -0.580 | -0.605 | -0.608 | -0.551 | -0.681 | -0.610 | -0.611 | -0.601 | -0.601 | -0.597 | -0.598 | -0.598 | <b>-0.602</b> |
| SLYP           | -0.699 | -0.701 | -0.695 | -0.695 | -0.714 | -0.677 | -0.695 | -0.697 | -0.679 | -0.698 | -0.700 | -0.654 | -0.757 | -0.694 | -0.704 | -0.696 | -0.699 | -0.695 | -0.696 | -0.696 | <b>-0.697</b> |
| SP86           | -0.696 | -0.699 | -0.700 | -0.700 | -0.709 | -0.681 | -0.704 | -0.707 | -0.684 | -0.708 | -0.710 | -0.653 | -0.752 | -0.708 | -0.702 | -0.705 | -0.702 | -0.702 | -0.703 | -0.704 | <b>-0.701</b> |
| SPBE           | -0.605 | -0.608 | -0.602 | -0.602 | -0.627 | -0.586 | -0.613 | -0.616 | -0.589 | -0.617 | -0.621 | -0.556 | -0.687 | -0.625 | -0.617 | -0.611 | -0.608 | -0.605 | -0.607 | -0.607 | <b>-0.610</b> |
| SPKZB          | -0.591 | -0.594 | -0.586 | -0.586 | -0.613 | -0.572 | -0.598 | -0.601 | -0.576 | -0.602 | -0.605 | -0.543 | -0.675 | -0.610 | -0.603 | -0.596 | -0.592 | -0.589 | -0.591 | -0.591 | <b>-0.596</b> |
| SPL            | -0.485 | -0.487 | -0.465 | -0.465 | -0.509 | -0.450 | -0.474 | -0.475 | -0.454 | -0.478 | -0.478 | -0.427 | -0.582 | -0.479 | -0.495 | -0.474 | -0.474 | -0.468 | -0.468 | -0.468 | <b>-0.478</b> |
| SPW91          | -0.613 | -0.615 | -0.610 | -0.610 | -0.633 | -0.594 | -0.620 | -0.624 | -0.598 | -0.624 | -0.628 | -0.565 | -0.692 | -0.631 | -0.623 | -0.619 | -0.616 | -0.613 | -0.615 | -0.615 | <b>-0.618</b> |
| SRevTPSS       | -0.604 | -0.606 | -0.599 | -0.599 | -0.625 | -0.585 | -0.610 | -0.613 | -0.588 | -0.614 | -0.617 | -0.556 | -0.683 | -0.620 | -0.614 | -0.608 | -0.605 | -0.602 | -0.603 | -0.604 | <b>-0.608</b> |
| STPSS          | -0.594 | -0.596 | -0.589 | -0.589 | -0.616 | -0.575 | -0.600 | -0.604 | -0.578 | -0.604 | -0.608 | -0.545 | -0.677 | -0.612 | -0.605 | -0.598 | -0.595 | -0.592 | -0.593 | -0.594 | <b>-0.598</b> |
| SVP86          | -0.696 | -0.699 | -0.700 | -0.700 | -0.709 | -0.681 | -0.704 | -0.707 | -0.684 | -0.708 | -0.711 | -0.653 | -0.752 | -0.708 | -0.702 | -0.705 | -0.702 | -0.702 | -0.703 | -0.704 | <b>-0.701</b> |
| SVWN5          | -0.484 | -0.486 | -0.464 | -0.464 | -0.508 | -0.450 | -0.474 | -0.475 | -0.453 | -0.477 | -0.478 | -0.426 | -0.581 | -0.479 | -0.495 | -0.473 | -0.474 | -0.468 | -0.467 | -0.467 | <b>-0.477</b> |
| TPSSB95        | 0.039  | 0.026  | 0.098  | 0.098  | -0.096 | 0.085  | 0.083  | 0.082  | 0.085  | 0.083  | 0.081  | 0.087  | -0.173 | 0.102  | 0.003  | 0.088  | 0.075  | 0.097  | 0.098  | 0.099  | <b>0.057</b>  |
| TPSSBRC        | 0.124  | 0.119  | 0.217  | 0.218  | 0.011  | 0.214  | 0.188  | 0.179  | 0.213  | 0.187  | 0.179  | 0.220  | -0.118 | 0.210  | 0.067  | 0.236  | 0.161  | 0.231  | 0.213  | 0.222  | <b>0.164</b>  |
| TPSSKCIS       | 0.109  | 0.103  | 0.175  | 0.175  | -0.003 | 0.183  | 0.155  | 0.138  | 0.181  | 0.153  | 0.136  | 0.188  | -0.119 | 0.191  | 0.052  | 0.202  | 0.124  | 0.187  | 0.174  | 0.174  | <b>0.134</b>  |
| TPSSLYP        | -0.190 | -0.191 | -0.141 | -0.141 | -0.257 | -0.140 | -0.155 | -0.157 | -0.141 | -0.157 | -0.159 | -0.128 | -0.354 | -0.124 | -0.216 | -0.130 | -0.166 | -0.140 | -0.141 | -0.141 | <b>-0.168</b> |
| TPSSP86        | -0.013 | -0.017 | 0.078  | 0.078  | -0.106 | 0.073  | 0.050  | 0.027  | 0.072  | 0.049  | 0.027  | 0.083  | -0.191 | 0.088  | -0.063 | 0.061  | 0.007  | 0.067  | 0.068  | 0.091  | <b>0.026</b>  |
| TPSSPBE        | 0.172  | 0.166  | 0.249  | 0.249  | 0.054  | 0.253  | 0.229  | 0.222  | 0.252  | 0.228  | 0.222  | 0.258  | -0.057 | 0.264  | 0.121  | 0.279  | 0.194  | 0.275  | 0.246  | 0.246  | <b>0.206</b>  |
| TPSSPKZB       | 0.181  | 0.184  | 0.252  | 0.252  | 0.058  | 0.256  | 0.233  | 0.225  | 0.255  | 0.231  | 0.224  | 0.264  | -0.053 | 0.267  | 0.125  | 0.283  | 0.199  | 0.281  | 0.249  | 0.250  | <b>0.211</b>  |
| TPSSPL         | 0.197  | 0.188  | 0.260  | 0.260  | 0.075  | 0.266  | 0.238  | 0.229  | 0.266  | 0.238  | 0.228  | 0.271  | -0.036 | 0.280  | 0.142  | 0.298  | 0.211  | 0.275  | 0.259  | 0.257  | <b>0.220</b>  |
| TPSSPW91       | 0.162  | 0.158  | 0.240  | 0.240  | 0.048  | 0.243  | 0.221  | 0.210  | 0.241  | 0.222  | 0.209  | 0.249  | -0.067 | 0.257  | 0.110  | 0.268  | 0.187  | 0.249  | 0.237  | 0.237  | <b>0.196</b>  |
| TPSSRevTPSS    | 0.149  | 0.145  | 0.225  | 0.226  | 0.035  | 0.229  | 0.196  | 0.197  | 0.227  | 0.195  | 0.196  | 0.233  | -0.079 | 0.233  | 0.096  | 0.244  | 0.173  | 0.235  | 0.211  | 0.225  | <b>0.180</b>  |
| TPSSTPSS       | 0.180  | 0.183  | 0.252  | 0.252  | 0.057  | 0.257  | 0.232  | 0.225  | 0.256  | 0.232  | 0.225  | 0.264  | -0.054 | 0.268  | 0.124  | 0.285  | 0.199  | 0.280  | 0.249  | 0.250  | <b>0.211</b>  |
| TPSSVP86       | -0.012 | -0.016 | 0.080  | 0.080  | -0.105 | 0.075  | 0.051  | 0.029  | 0.073  | 0.050  | 0.028  | 0.085  | -0.190 | 0.090  | -0.061 | 0.063  | 0.009  | 0.069  | 0.070  | 0.093  | <b>0.028</b>  |
| TPSSVWN        | 0.165  | 0.160  | 0.220  | 0.220  | 0.045  | 0.224  | 0.199  | 0.189  | 0.223  | 0.197  | 0.189  | 0.230  | -0.052 | 0.239  | 0.110  | 0.255  | 0.179  | 0.230  | 0.219  | 0.217  | <b>0.183</b>  |
| TPSSVWN5       | 0.198  | 0.192  | 0.262  | 0.262  | 0.076  | 0.268  | 0.239  | 0.230  | 0.267  | 0.239  | 0.229  | 0.272  | -0.035 | 0.280  | 0.143  | 0.302  | 0.212  | 0.278  | 0.261  | 0.259  | <b>0.222</b>  |
| wPBEhB95       | -0.110 | -0.111 | -0.050 | -0.050 | -0.213 | -0.041 | -0.093 | -0.075 | -0.041 | -0.093 | -0.076 | -0.013 | -0.316 | -0.021 | -0.188 | -0.076 | -0.105 | -0.053 | -0.062 | -0.048 | <b>-0.092</b> |
| wPBEhBRC       | -0.049 | -0.052 | 0.029  | 0.029  | -0.136 | 0.034  | 0.012  | 0.005  | 0.032  | 0.011  | 0.004  | 0.044  | -0.264 | 0.028  | -0.088 | 0.040  | -0.013 | 0.036  | 0.028  | 0.033  | <b>-0.012</b> |
| wPBEhKCIS      | -0.084 | -0.089 | -0.008 | -0.008 | -0.164 | -0.004 | -0.022 | -0.030 | -0.005 | -0.023 | -0.032 | 0.007  | -0.271 | 0.013  | -0.120 | -0.003 | -0.051 | -0.007 | -0.009 | -0.006 | <b>-0.046</b> |
| wPBEhLYP       | -0.302 | -0.303 | -0.261 | -0.261 | -0.355 | -0.253 | -0.268 | -0.268 | -0.255 | -0.269 | -0.270 | -0.240 | -0.444 | -0.246 | -0.319 | -0.253 | -0.279 | -0.262 | -0.260 | -0.259 | <b>-0.281</b> |
| wPBEhP86       | -0.218 | -0.221 | -0.165 | -0.165 | -0.272 | -0.154 | -0.180 | -0.184 | -0.155 | -0.182 | -0.187 | -0.137 | -0.363 | -0.159 | -0.242 | -0.172 | -0.193 | -0.173 | -0.171 | -0.170 | <b>-0.193</b> |
| wPBEhPBE       | -0.039 | -0.044 | 0.045  | 0.045  | -0.125 | 0.045  | 0.016  | 0.007  | 0.044  | 0.014  | 0.006  | 0.058  | -0.231 | 0.062  | -0.079 | 0.046  | -0.009 | 0.043  | 0.043  | 0.044  | <b>0.000</b>  |
| wPBEhPKZB      | -0.031 | -0.036 | 0.052  | 0.052  | -0.119 | 0.052  | 0.023  | 0.013  | 0.050  | 0.022  | 0.012  | 0.065  | -0.224 | 0.069  | -0.071 | 0.054  | -0.002 | 0.051  | 0.049  | 0.051  | <b>0.007</b>  |
| wPBEhPL        | 0.032  | 0.028  | 0.097  | 0.098  | -0.061 | 0.100  | 0.082  | 0.073  | 0.100  | 0.081  | 0.072  | 0.108  | -0.175 | 0.118  | -0.009 | 0.116  | 0.054  | 0.103  | 0.096  | 0.097  | <b>0.061</b>  |
| wPBEhPW91      | -0.054 | -0.058 | 0.026  | 0.027  | -0.136 | 0.030  | -0.001 | -0.010 | 0.029  | -0.003 | -0.011 | 0.044  | -0.241 | 0.043  | -0.091 | 0.030  | -0.023 | 0.027  | 0.022  | 0.025  | <b>-0.016</b> |
| wPBEhRevTPSS   | -0.063 | -0.067 | 0.012  | 0.012  | -0.144 | 0.016  | -0.012 | -0.019 | 0.015  | -0.014 | -0.021 | 0.030  | -0.247 | 0.030  | -0.099 | 0.016  | -0.033 | 0.012  | 0.008  | 0.011  | <b>-0.028</b> |
| wPBEhTPSS      | -0.032 | -0.037 | 0.051  | 0.051  | -0.120 | 0.052  | 0.023  | 0.013  | 0.051  | 0.021  | 0.012  | 0.065  | -0.226 | 0.069  | -0.072 | 0.053  | -0.002 | 0.049  | 0.049  | 0.051  | <b>0.006</b>  |
| wPBEhVP86      | -0.216 | -0.219 | -0.164 | -0.164 | -0.270 | -0.152 | -0.178 | -0.183 | -0.154 | -0.180 | -0.185 | -0.136 | -0.361 | -0.158 | -0.239 | -0.170 | -0.192 | -0.171 | -0.169 | -0.168 | <b>-0.192</b> |
| wPBEhVWN       | 0.002  | -0.001 | 0.063  | 0.063  | -0.085 | 0.068  | 0.045  | 0.039  | 0.067  | 0.044  | 0.038  | 0.075  | -0.190 | 0.083  | -0.035 | 0.082  | 0.024  | 0.065  | 0.061  | 0.060  | <b>0.029</b>  |
| wPBEhVWN5      | 0.033  | 0.029  | 0.099  | 0.099  | -0.060 | 0.102  | 0.083  | 0.074  | 0.101  | 0.083  | 0.073  | 0.110  | -0.173 | 0.119  | -0.008 | 0.117  | 0.055  | 0.104  | 0.098  | 0.097  | <b>0.062</b>  |
| XaB95          | -0.679 | -0.680 | -0.679 | -0.679 | -0.692 | -0.646 | -0.683 | -0.688 | -0.650 | -0.686 | -0.691 | -0.610 | -0.755 | -0.675 | -0.683 | -0.684 | -0.682 | -0.683 | -0.682 | -0.684 | <b>-0.680</b> |
| XaKCIS         | -0     |        |        |        |        |        |        |        |        |        |        |        |        |        |        |        |        |        |        |        |               |

|                       |        |        |        |        |        |        |        |        |        |        |        |        |        |        |        |        |        |        |        |        |               |
|-----------------------|--------|--------|--------|--------|--------|--------|--------|--------|--------|--------|--------|--------|--------|--------|--------|--------|--------|--------|--------|--------|---------------|
| <b>XaP86</b>          | -0.735 | -0.738 | -0.744 | -0.744 | -0.746 | -0.724 | -0.747 | -0.750 | -0.728 | -0.751 | -0.754 | -0.695 | -0.781 | -0.749 | -0.740 | -0.748 | -0.745 | -0.746 | -0.747 | -0.748 | <b>-0.743</b> |
| <b>XaPBE</b>          | -0.649 | -0.651 | -0.654 | -0.654 | -0.666 | -0.635 | -0.662 | -0.666 | -0.640 | -0.666 | -0.670 | -0.604 | -0.719 | -0.672 | -0.658 | -0.661 | -0.657 | -0.656 | -0.658 | -0.659 | <b>-0.658</b> |
| <b>XaPKZB</b>         | -0.635 | -0.638 | -0.638 | -0.638 | -0.653 | -0.622 | -0.647 | -0.651 | -0.626 | -0.651 | -0.655 | -0.592 | -0.706 | -0.657 | -0.644 | -0.646 | -0.641 | -0.640 | -0.642 | -0.643 | <b>-0.643</b> |
| <b>XaPL</b>           | -0.533 | -0.534 | -0.521 | -0.521 | -0.552 | -0.507 | -0.530 | -0.530 | -0.511 | -0.534 | -0.534 | -0.482 | -0.615 | -0.536 | -0.541 | -0.529 | -0.528 | -0.525 | -0.524 | -0.524 | <b>-0.531</b> |
| <b>XaPW91</b>         | -0.656 | -0.659 | -0.662 | -0.662 | -0.672 | -0.643 | -0.669 | -0.672 | -0.647 | -0.673 | -0.676 | -0.612 | -0.723 | -0.678 | -0.665 | -0.668 | -0.664 | -0.664 | -0.665 | -0.666 | <b>-0.665</b> |
| <b>XaRevTPSS</b>      | -0.647 | -0.649 | -0.650 | -0.650 | -0.663 | -0.634 | -0.658 | -0.661 | -0.637 | -0.662 | -0.665 | -0.604 | -0.714 | -0.666 | -0.655 | -0.657 | -0.653 | -0.653 | -0.653 | -0.654 | <b>-0.654</b> |
| <b>XaTPSS</b>         | -0.638 | -0.640 | -0.641 | -0.641 | -0.655 | -0.624 | -0.649 | -0.653 | -0.628 | -0.654 | -0.657 | -0.594 | -0.708 | -0.659 | -0.647 | -0.648 | -0.644 | -0.643 | -0.645 | -0.645 | <b>-0.646</b> |
| <b>XaVP86</b>         | -0.685 | -0.688 | -0.689 | -0.689 | -0.746 | -0.671 | -0.696 | -0.698 | -0.728 | -0.699 | -0.700 | -0.695 | -0.741 | -0.704 | -0.689 | -0.696 | -0.692 | -0.693 | -0.694 | -0.695 | <b>-0.699</b> |
| <b>XaVWN</b>          | -0.551 | -0.552 | -0.542 | -0.542 | -0.568 | -0.466 | -0.486 | -0.551 | -0.469 | -0.490 | -0.555 | -0.441 | -0.628 | -0.471 | -0.558 | -0.550 | -0.548 | -0.545 | -0.544 | -0.545 | <b>-0.530</b> |
| <b>XaVWN5</b>         | -0.532 | -0.534 | -0.433 | -0.433 | -0.551 | -0.443 | -0.465 | -0.530 | -0.447 | -0.468 | -0.534 | -0.418 | -0.615 | -0.449 | -0.540 | -0.529 | -0.440 | -0.524 | -0.523 | -0.523 | <b>-0.497</b> |
| <b>LC-BB95</b>        | -0.004 | -0.015 | 0.031  | 0.031  | -0.126 | 0.018  | 0.017  | 0.016  | 0.018  | 0.016  | 0.016  | 0.019  | -0.213 | 0.005  | -0.067 | 0.019  | -0.001 | 0.029  | 0.031  | 0.033  | <b>-0.006</b> |
| <b>LC-BBRC</b>        | 0.062  | 0.058  | 0.361  | 0.361  | -0.057 | 0.324  | 0.251  | 0.223  | 0.329  | 0.249  | 0.222  | 0.348  | -0.263 | 0.316  | 0.029  | 0.268  | 0.215  | 0.378  | 0.360  | 0.437  | <b>0.224</b>  |
| <b>LC-BKCIS</b>       | 0.021  | 0.014  | 0.184  | 0.184  | -0.104 | 0.199  | 0.132  | 0.112  | 0.198  | 0.130  | 0.111  | 0.189  | -0.278 | 0.169  | -0.033 | 0.139  | 0.105  | 0.183  | 0.181  | 0.206  | <b>0.102</b>  |
| <b>LC-BLYP</b>        | -0.347 | -0.348 | -0.302 | -0.301 | -0.405 | -0.305 | -0.320 | -0.318 | -0.307 | -0.322 | -0.320 | -0.296 | -0.499 | -0.319 | -0.361 | -0.306 | -0.317 | -0.300 | -0.303 | -0.301 | <b>-0.330</b> |
| <b>LC-BP86</b>        | -0.173 | -0.174 | 0.435  | 0.431  | -0.238 | 0.179  | 0.082  | 0.037  | 0.177  | 0.080  | 0.041  | 0.193  | -0.273 | 0.178  | -0.093 | 0.014  | 0.186  | 0.279  | 0.415  | 0.440  | <b>0.111</b>  |
| <b>LC-BPBE</b>        | 0.141  | 0.134  | 0.571  | 0.570  | 0.028  | 0.488  | 0.458  | 0.378  | 0.484  | 0.458  | 0.379  | 0.485  | -0.181 | 0.435  | 0.120  | 0.456  | 0.345  | 0.543  | 0.572  | 0.588  | <b>0.373</b>  |
| <b>LC-BPKZB</b>       | 0.149  | 0.142  | 0.568  | 0.571  | 0.041  | 0.486  | 0.460  | 0.381  | 0.482  | 0.458  | 0.382  | 0.497  | -0.155 | 0.445  | 0.151  | 0.487  | 0.346  | 0.542  | 0.573  | 0.590  | <b>0.380</b>  |
| <b>LC-BPL</b>         | 0.209  | 0.205  | 0.494  | 0.494  | 0.081  | 0.457  | 0.397  | 0.354  | 0.457  | 0.389  | 0.353  | 0.456  | -0.109 | 0.458  | 0.173  | 0.480  | 0.329  | 0.514  | 0.522  | 0.558  | <b>0.364</b>  |
| <b>LC-BPW91</b>       | 0.123  | 0.114  | 0.563  | 0.563  | -0.009 | 0.476  | 0.409  | 0.328  | 0.470  | 0.392  | 0.314  | 0.472  | -0.204 | 0.418  | 0.075  | 0.410  | 0.332  | 0.539  | 0.591  | 0.581  | <b>0.348</b>  |
| <b>LC-BRevTPSS</b>    | 0.094  | 0.088  | 0.517  | 0.519  | -0.041 | 0.444  | 0.304  | 0.250  | 0.437  | 0.308  | 0.243  | 0.437  | -0.211 | 0.390  | 0.044  | 0.392  | 0.305  | 0.463  | 0.509  | 0.543  | <b>0.302</b>  |
| <b>LC-BTPSS</b>       | 0.145  | 0.139  | 0.571  | 0.570  | 0.047  | 0.486  | 0.458  | 0.383  | 0.482  | 0.458  | 0.382  | 0.490  | -0.172 | 0.440  | 0.139  | 0.484  | 0.346  | 0.544  | 0.573  | 0.601  | <b>0.378</b>  |
| <b>LC-BVP86</b>       | -0.170 | -0.171 | 0.447  | 0.443  | -0.234 | 0.189  | 0.080  | 0.042  | 0.184  | 0.084  | 0.040  | 0.210  | -0.272 | 0.183  | -0.086 | 0.016  | 0.189  | 0.295  | 0.420  | 0.443  | <b>0.117</b>  |
| <b>LC-BVWN</b>        | 0.163  | 0.150  | 0.381  | 0.381  | 0.019  | 0.354  | 0.294  | 0.268  | 0.353  | 0.293  | 0.268  | 0.355  | -0.139 | 0.358  | 0.121  | 0.341  | 0.263  | 0.402  | 0.385  | 0.413  | <b>0.271</b>  |
| <b>LC-BVWN5</b>       | 0.211  | 0.207  | 0.509  | 0.509  | 0.084  | 0.471  | 0.403  | 0.364  | 0.470  | 0.402  | 0.364  | 0.466  | -0.107 | 0.461  | 0.177  | 0.504  | 0.343  | 0.551  | 0.526  | 0.604  | <b>0.376</b>  |
| <b>LC-BRxB95</b>      | -0.014 | -0.015 | 0.032  | 0.032  | -0.126 | 0.019  | 0.017  | 0.016  | 0.019  | 0.017  | 0.016  | 0.020  | -0.212 | 0.031  | -0.066 | 0.019  | 0.001  | 0.030  | 0.033  | 0.034  | <b>-0.005</b> |
| <b>LC-BRxBRC</b>      | 0.055  | 0.051  | 0.367  | 0.367  | -0.058 | 0.295  | 0.227  | 0.188  | 0.299  | 0.227  | 0.187  | 0.302  | -0.266 | 0.273  | 0.025  | 0.240  | 0.217  | 0.368  | 0.361  | 0.433  | <b>0.208</b>  |
| <b>LC-BRxCIS</b>      | 0.014  | 0.008  | 0.181  | 0.181  | -0.107 | 0.144  | 0.112  | 0.091  | 0.143  | 0.111  | 0.090  | 0.148  | -0.280 | 0.139  | -0.040 | 0.105  | 0.094  | 0.175  | 0.176  | 0.186  | <b>0.084</b>  |
| <b>LC-BRxDLYP</b>     | -0.360 | -0.360 | -0.319 | -0.319 | -0.414 | -0.327 | -0.342 | -0.339 | -0.329 | -0.343 | -0.341 | -0.317 | -0.504 | -0.340 | -0.373 | -0.329 | -0.333 | -0.320 | -0.321 | -0.320 | <b>-0.347</b> |
| <b>LC-BRxDP86</b>     | -0.187 | -0.189 | 0.435  | 0.435  | -0.252 | 0.164  | 0.031  | -0.036 | 0.163  | 0.011  | -0.038 | 0.173  | -0.280 | 0.168  | -0.108 | -0.015 | 0.180  | 0.230  | 0.413  | 0.429  | <b>0.086</b>  |
| <b>LC-BRxDPBE</b>     | 0.138  | 0.131  | 0.579  | 0.578  | 0.029  | 0.487  | 0.364  | 0.326  | 0.475  | 0.358  | 0.307  | 0.478  | -0.188 | 0.430  | 0.109  | 0.409  | 0.347  | 0.523  | 0.574  | 0.605  | <b>0.353</b>  |
| <b>LC-BRxDPKZB</b>    | 0.155  | 0.139  | 0.563  | 0.562  | 0.035  | 0.489  | 0.392  | 0.325  | 0.477  | 0.390  | 0.323  | 0.491  | -0.159 | 0.440  | 0.129  | 0.478  | 0.350  | 0.525  | 0.577  | 0.592  | <b>0.364</b>  |
| <b>LC-BRxDPL</b>      | 0.211  | 0.207  | 0.502  | 0.502  | 0.073  | 0.448  | 0.366  | 0.324  | 0.448  | 0.367  | 0.323  | 0.445  | -0.105 | 0.479  | 0.178  | 0.441  | 0.355  | 0.521  | 0.544  | 0.540  | <b>0.358</b>  |
| <b>LC-BRxDPW91</b>    | 0.121  | 0.111  | 0.540  | 0.540  | -0.005 | 0.447  | 0.328  | 0.245  | 0.443  | 0.323  | 0.244  | 0.461  | -0.212 | 0.403  | 0.058  | 0.377  | 0.338  | 0.513  | 0.559  | 0.562  | <b>0.320</b>  |
| <b>LC-BRxDRevTPSS</b> | 0.089  | 0.084  | 0.489  | 0.490  | -0.042 | 0.370  | 0.269  | 0.217  | 0.368  | 0.264  | 0.216  | 0.388  | -0.217 | 0.353  | 0.037  | 0.302  | 0.304  | 0.459  | 0.500  | 0.545  | <b>0.274</b>  |
| <b>LC-BRxDTPSS</b>    | 0.142  | 0.136  | 0.577  | 0.579  | 0.035  | 0.489  | 0.392  | 0.329  | 0.478  | 0.388  | 0.308  | 0.493  | -0.162 | 0.440  | 0.116  | 0.451  | 0.348  | 0.539  | 0.580  | 0.591  | <b>0.363</b>  |
| <b>LC-BRxDVP86</b>    | -0.185 | -0.186 | 0.431  | 0.426  | -0.248 | 0.167  | 0.015  | -0.035 | 0.167  | 0.017  | -0.035 | 0.181  | -0.286 | 0.170  | -0.105 | -0.011 | 0.181  | 0.265  | 0.410  | 0.441  | <b>0.089</b>  |
| <b>LC-BRxDVWN</b>     | 0.162  | 0.152  | 0.377  | 0.377  | 0.022  | 0.335  | 0.268  | 0.247  | 0.334  | 0.267  | 0.247  | 0.338  | -0.135 | 0.343  | 0.110  | 0.314  | 0.265  | 0.373  | 0.374  | 0.418  | <b>0.259</b>  |
| <b>LC-BRxDVWN5</b>    | 0.214  | 0.212  | 0.504  | 0.504  | 0.078  | 0.450  | 0.370  | 0.328  | 0.450  | 0.369  | 0.329  | 0.448  | -0.102 | 0.481  | 0.181  | 0.446  | 0.335  | 0.528  | 0.529  | 0.560  | <b>0.361</b>  |
| <b>LC-G96B95</b>      | -0.004 | -0.004 | 0.031  | 0.031  | -0.126 | 0.018  | 0.017  | 0.016  | 0.018  | 0.016  | 0.016  | 0.019  | -0.213 | 0.005  | -0.067 | 0.019  | 0.000  | 0.029  | 0.031  | 0.033  | <b>-0.006</b> |
| <b>LC-G96BRC</b>      | 0.064  | 0.060  | 0.366  | 0.366  | -0.054 | 0.336  | 0.251  | 0.229  | 0.334  | 0.250  | 0.226  | 0.338  | -0.260 | 0.320  | 0.032  | 0.272  | 0.217  | 0.384  | 0.375  | 0.439  | <b>0.227</b>  |
| <b>LC-G96KCIS</b>     | 0.020  | 0.013  | 0.190  | 0.190  | -0.102 | 0.200  | 0.133  | 0.112  | 0.199  | 0.131  | 0.111  | 0.191  | -0.277 | 0.171  | -0.032 | 0.140  | 0.114  | 0.184  | 0.187  | 0.221  | <b>0.105</b>  |
| <b>LC-G96LYP</b>      | -0.347 | -0.347 | -0.301 | -0.301 | -0.405 | -0.305 | -0.320 | -0.318 | -0.307 | -0.322 | -0.319 | -0.296 | -0.498 | -0.319 | -0.361 | -0.307 | -0.317 | -0.301 | -0.302 | -0.300 | <b>-0.330</b> |
| <b>LC-G96P86</b>      | -0.170 | -0.172 | 0.435  | 0.434  | -0.233 | 0.188  | 0.083  | 0.041  | 0.179  | 0.082  | 0.043  | 0.209  | -0.272 | 0.182  | -0.084 | 0.016  | 0.190  | 0.256  | 0.414  | 0.445  | <b>0.113</b>  |
| <b>LC-G96PBE</b>      | 0.149  | 0.134  | 0.571  | 0.571  | 0.031  | 0.485  | 0.458  | 0.379  | 0.499  | 0.457  | 0.374  | 0.482  | -0.179 | 0.438  | 0.132  | 0.469  | 0.346  | 0.543  | 0.572  | 0.590  | <b>0.375</b>  |
| <b>LC-G96PKZB</b>     | 0.152  | 0.142  | 0.571  | 0.571  | 0.055  | 0.497  | 0.459  | 0.381  | 0.487  | 0.460  | 0.381  | 0.486  | -0.152 | 0.448  | 0.155  | 0.475  | 0.349  | 0.544  | 0.573  | 0.588  | <b>0.381</b>  |
| <b>LC-G96PL</b>       | 0.210  | 0.205  | 0.495  | 0.495  | 0.082  | 0.457  | 0.395  | 0.353  | 0.456  | 0.393  | 0.352  | 0.460  | -0.107 | 0.459  | 0.175  | 0.480  | 0.330  | 0.514  | 0.507  | 0.526  | <b>0.362</b>  |
| <b>LC-G96PW91</b>     | 0.124  | 0.115  | 0.565  | 0.564  | 0.010  | 0.474  | 0.419  | 0.328  | 0.471  | 0.416  | 0.336  | 0.471  | -0.198 | 0.421  | 0.078  | 0.444  | 0.336  | 0.536  | 0.575  | 0.586  | <b>0.354</b>  |
| <b>LC-G96RevTPSS</b>  | 0.096  | 0.090  | 0.521  | 0.523  | -0.024 | 0.441  | 0.322  | 0.263  | 0.439  | 0.304  | 0.261  | 0.418  | -0.208 | 0.394  | 0.048  | 0.389  | 0.307  | 0.465  | 0.512  | 0.546  | <b>0.305</b>  |
| <b>LC-G96TPSS</b>     | 0.155  | 0.141  | 0.572  | 0.571  | 0.042  | 0.487  | 0.475  | 0.381  | 0.482  | 0.459  | 0.383  | 0.487  | -0.168 | 0.441  | 0.150  | 0.476  | 0.356  | 0.544  | 0.574  | 0.616  | <b>0.381</b>  |
| <b>LC-G96VP86</b>     | -0.166 | -0.168 | 0.448  | 0.448  | -0.232 | 0.194  | 0.080  | 0.054  | 0.186  | 0.080  | 0.041  | 0.211  | -0.271 | 0.188  | -0.083 | 0.018  | 0.192  | 0.295  | 0.419  | 0.447  | <b>0.119</b>  |
| <b>LC-G96VWN</b>      | 0.164  | 0.152  | 0.384  | 0.384  | 0.021  | 0.355  | 0.294  | 0.268  | 0.353  | 0.293  | 0.268  | 0.354  | -0.137 | 0.358  | 0.123  | 0.342  | 0.264  | 0.406  | 0.386  | 0.416  | <b>0.272</b>  |
| <b>LC-G96VWN5</b>     | 0.212  | 0.209  | 0.509  | 0.509  | 0.088  | 0.468  | 0.405  | 0.360  | 0.469  | 0.402  | 0.359  | 0.466  | -0.105 | 0.461  | 0.178  | 0.503  | 0.344  | 0.550  | 0.527  | 0.574  | <b>0.374</b>  |
| <b>LC-LGB95</b>       | -0.015 | -0.015 | 0.031  | 0.031  | -0.127 | 0.018  | 0.016  | 0.016  | 0.018  | 0.016  | 0.016  | 0.019  | -0.213 | 0.005  | -0.068 | 0.018  | -0.001 | 0.029  | 0.031  | 0.033  | <b>-0.00</b>  |

|                |        |        |        |        |        |        |        |        |        |        |        |        |        |        |        |        |        |        |         |        |               |
|----------------|--------|--------|--------|--------|--------|--------|--------|--------|--------|--------|--------|--------|--------|--------|--------|--------|--------|--------|---------|--------|---------------|
| LC-LGPBE       | 0.138  | 0.131  | 0.561  | 0.561  | 0.023  | 0.491  | 0.457  | 0.378  | 0.488  | 0.458  | 0.378  | 0.490  | -0.188 | 0.462  | 0.114  | 0.486  | 0.342  | 0.563  | 0.571   | 0.590  | <b>0.375</b>  |
| LC-LGPKZB      | 0.144  | 0.137  | 0.562  | 0.563  | 0.022  | 0.484  | 0.459  | 0.387  | 0.491  | 0.460  | 0.386  | 0.487  | -0.162 | 0.492  | 0.143  | 0.490  | 0.345  | 0.563  | 0.574   | 0.594  | <b>0.381</b>  |
| LC-LGPL        | 0.208  | 0.203  | 0.509  | 0.509  | 0.069  | 0.470  | 0.398  | 0.360  | 0.470  | 0.398  | 0.382  | 0.462  | -0.113 | 0.485  | 0.171  | 0.484  | 0.330  | 0.532  | 0.527   | 0.548  | <b>0.370</b>  |
| LC-LGPW91      | 0.120  | 0.110  | 0.558  | 0.555  | -0.015 | 0.476  | 0.414  | 0.324  | 0.474  | 0.414  | 0.326  | 0.479  | -0.212 | 0.448  | 0.069  | 0.423  | 0.330  | 0.534  | 0.547   | 0.582  | <b>0.348</b>  |
| LC-LGRRevTPSS  | 0.091  | 0.085  | 0.510  | 0.508  | -0.044 | 0.441  | 0.333  | 0.248  | 0.415  | 0.334  | 0.251  | 0.441  | -0.218 | 0.409  | 0.040  | 0.380  | 0.302  | 0.465  | 0.509   | 0.551  | <b>0.302</b>  |
| LC-LGTPSS      | 0.139  | 0.137  | 0.563  | 0.563  | 0.027  | 0.486  | 0.459  | 0.385  | 0.482  | 0.459  | 0.386  | 0.483  | -0.178 | 0.469  | 0.132  | 0.491  | 0.343  | 0.564  | 0.568   | 0.592  | <b>0.377</b>  |
| LC-LGVP86      | -0.175 | -0.175 | 0.442  | 0.438  | -0.241 | 0.194  | 0.076  | 0.036  | 0.195  | 0.074  | 0.033  | 0.202  | -0.276 | 0.153  | -0.089 | 0.012  | 0.179  | 0.275  | 0.419   | 0.438  | <b>0.111</b>  |
| LC-LGVWN       | 0.162  | 0.151  | 0.391  | 0.391  | 0.016  | 0.356  | 0.298  | 0.272  | 0.354  | 0.298  | 0.272  | 0.363  | -0.143 | 0.356  | 0.112  | 0.341  | 0.263  | 0.401  | 0.388   | 0.417  | <b>0.273</b>  |
| LC-LGVWN5      | 0.211  | 0.207  | 0.524  | 0.524  | 0.076  | 0.479  | 0.408  | 0.370  | 0.478  | 0.409  | 0.366  | 0.471  | -0.111 | 0.490  | 0.174  | 0.512  | 0.337  | 0.552  | 0.532   | 0.567  | <b>0.379</b>  |
| LC-mPWB95      | -0.015 | -0.015 | 0.031  | 0.031  | -0.127 | 0.018  | 0.016  | 0.016  | 0.018  | 0.016  | 0.016  | 0.019  | -0.213 | 0.005  | -0.067 | 0.019  | -0.001 | 0.029  | 0.031   | 0.033  | <b>-0.007</b> |
| LC-mPWBRC      | 0.062  | 0.057  | 0.360  | 0.360  | -0.057 | 0.329  | 0.249  | 0.222  | 0.317  | 0.249  | 0.221  | 0.332  | -0.263 | 0.303  | 0.028  | 0.268  | 0.214  | 0.377  | 0.360   | 0.435  | <b>0.221</b>  |
| LC-mPWKCIS     | 0.020  | 0.013  | 0.184  | 0.184  | -0.104 | 0.198  | 0.130  | 0.110  | 0.196  | 0.129  | 0.109  | 0.188  | -0.280 | 0.155  | -0.034 | 0.137  | 0.104  | 0.182  | 0.180   | 0.204  | <b>0.100</b>  |
| LC-mPWLYP      | -0.348 | -0.349 | -0.303 | -0.303 | -0.406 | -0.306 | -0.321 | -0.319 | -0.308 | -0.323 | -0.321 | -0.297 | -0.499 | -0.320 | -0.362 | -0.308 | -0.318 | -0.301 | -0.304  | -0.302 | <b>-0.331</b> |
| LC-mPWP86      | -0.174 | -0.175 | 0.434  | 0.430  | -0.240 | 0.177  | 0.080  | 0.039  | 0.182  | 0.078  | 0.040  | 0.191  | -0.274 | 0.179  | -0.095 | 0.012  | 0.184  | 0.277  | 0.415   | 0.439  | <b>0.110</b>  |
| LC-mPWPBE      | 0.142  | 0.133  | 0.573  | 0.574  | 0.027  | 0.490  | 0.458  | 0.377  | 0.480  | 0.458  | 0.372  | 0.483  | -0.182 | 0.437  | 0.127  | 0.456  | 0.343  | 0.564  | 0.571   | 0.588  | <b>0.374</b>  |
| LC-mPWPKZB     | 0.148  | 0.140  | 0.588  | 0.571  | 0.039  | 0.496  | 0.475  | 0.382  | 0.485  | 0.455  | 0.382  | 0.489  | -0.156 | 0.447  | 0.140  | 0.474  | 0.347  | 0.566  | 0.571   | 0.590  | <b>0.382</b>  |
| LC-mPWPL       | 0.208  | 0.205  | 0.495  | 0.495  | 0.079  | 0.456  | 0.388  | 0.353  | 0.456  | 0.388  | 0.352  | 0.454  | -0.110 | 0.457  | 0.172  | 0.479  | 0.329  | 0.514  | 0.506   | 0.557  | <b>0.362</b>  |
| LC-mPWPW91     | 0.121  | 0.112  | 0.563  | 0.563  | -0.008 | 0.471  | 0.399  | 0.326  | 0.470  | 0.391  | 0.341  | 0.485  | -0.204 | 0.419  | 0.080  | 0.401  | 0.332  | 0.537  | 0.553   | 0.580  | <b>0.347</b>  |
| LC-mPWRRevTPSS | 0.094  | 0.087  | 0.518  | 0.518  | -0.040 | 0.438  | 0.302  | 0.242  | 0.433  | 0.320  | 0.249  | 0.416  | -0.213 | 0.412  | 0.043  | 0.389  | 0.304  | 0.466  | 0.510   | 0.549  | <b>0.302</b>  |
| LC-mPWTPSS     | 0.141  | 0.138  | 0.588  | 0.589  | 0.049  | 0.490  | 0.458  | 0.382  | 0.483  | 0.473  | 0.381  | 0.490  | -0.172 | 0.443  | 0.133  | 0.475  | 0.345  | 0.563  | 0.590   | 0.591  | <b>0.382</b>  |
| LC-mPWVP86     | -0.171 | -0.172 | 0.442  | 0.446  | -0.235 | 0.183  | 0.085  | 0.044  | 0.182  | 0.083  | 0.037  | 0.197  | -0.273 | 0.180  | -0.086 | 0.015  | 0.187  | 0.294  | 0.417   | 0.440  | <b>0.115</b>  |
| LC-mPWVWN      | 0.163  | 0.149  | 0.380  | 0.381  | 0.019  | 0.353  | 0.293  | 0.267  | 0.352  | 0.293  | 0.267  | 0.354  | -0.139 | 0.356  | 0.120  | 0.340  | 0.263  | 0.396  | 0.384   | 0.412  | <b>0.270</b>  |
| LC-mPWVWN5     | 0.211  | 0.207  | 0.508  | 0.508  | 0.083  | 0.470  | 0.402  | 0.361  | 0.469  | 0.401  | 0.359  | 0.465  | -0.108 | 0.460  | 0.176  | 0.504  | 0.338  | 0.550  | 0.527   | 0.579  | <b>0.373</b>  |
| LC-OB95        | 0.007  | 0.007  | 0.030  | 0.030  | -0.141 | 0.017  | 0.016  | 0.015  | 0.017  | 0.016  | 0.015  | 0.018  | -0.212 | 0.030  | -0.067 | 0.019  | -0.001 | 0.029  | 0.030   | 0.033  | <b>-0.005</b> |
| LC-OBRC        | 0.066  | 0.062  | 0.357  | 0.357  | -0.052 | 0.352  | 0.254  | 0.230  | 0.350  | 0.253  | 0.229  | 0.353  | -0.257 | 0.321  | 0.035  | 0.281  | 0.213  | 0.380  | 0.358   | 0.434  | <b>0.229</b>  |
| LC-OKCIS       | 0.023  | 0.016  | 0.185  | 0.185  | -0.101 | 0.201  | 0.134  | 0.114  | 0.200  | 0.132  | 0.113  | 0.193  | -0.274 | 0.178  | -0.030 | 0.147  | 0.104  | 0.182  | 0.186   | 0.202  | <b>0.105</b>  |
| LC-OLYP        | -0.345 | -0.346 | -0.300 | -0.301 | -0.404 | -0.304 | -0.318 | -0.317 | -0.305 | -0.321 | -0.318 | -0.294 | -0.495 | -0.322 | -0.359 | -0.303 | -0.317 | -0.300 | -0.301  | -0.300 | <b>-0.329</b> |
| LC-OP86        | -0.163 | -0.165 | 0.436  | 0.432  | -0.229 | 0.195  | 0.090  | 0.061  | 0.190  | 0.092  | 0.044  | 0.214  | -0.268 | 0.182  | -0.080 | 0.024  | 0.111  | 0.297  | 0.425   | 0.448  | <b>0.117</b>  |
| LC-OPBE        | 0.156  | 0.140  | 0.570  | 0.570  | 0.052  | 0.519  | 0.460  | 0.378  | 0.501  | 0.461  | 0.377  | 0.499  | -0.172 | 0.472  | 0.128  | 0.487  | 0.345  | 0.560  | 0.573   | 0.589  | <b>0.383</b>  |
| LC-OPKZB       | 0.166  | 0.160  | 0.571  | 0.571  | 0.056  | 0.504  | 0.463  | 0.383  | 0.500  | 0.462  | 0.385  | 0.503  | -0.147 | 0.480  | 0.156  | 0.488  | 0.345  | 0.541  | 0.574   | 0.592  | <b>0.388</b>  |
| LC-OPL         | 0.209  | 0.204  | 0.491  | 0.491  | 0.079  | 0.464  | 0.400  | 0.356  | 0.464  | 0.399  | 0.354  | 0.460  | -0.105 | 0.463  | 0.173  | 0.487  | 0.326  | 0.509  | 0.503   | 0.522  | <b>0.362</b>  |
| LC-OPW91       | 0.128  | 0.120  | 0.545  | 0.560  | -0.004 | 0.489  | 0.437  | 0.346  | 0.488  | 0.424  | 0.326  | 0.491  | -0.194 | 0.427  | 0.094  | 0.443  | 0.332  | 0.536  | 0.577   | 0.571  | <b>0.357</b>  |
| LC-ORRevTPSS   | 0.098  | 0.093  | 0.481  | 0.481  | -0.035 | 0.479  | 0.337  | 0.307  | 0.480  | 0.336  | 0.286  | 0.481  | -0.203 | 0.389  | 0.047  | 0.388  | 0.303  | 0.464  | 0.486   | 0.550  | <b>0.312</b>  |
| LC-OTPSS       | 0.152  | 0.142  | 0.572  | 0.572  | 0.050  | 0.501  | 0.463  | 0.387  | 0.503  | 0.461  | 0.385  | 0.503  | -0.163 | 0.480  | 0.154  | 0.491  | 0.352  | 0.542  | 0.578   | 0.591  | <b>0.386</b>  |
| LC-OVP86       | -0.161 | -0.162 | 0.441  | 0.437  | -0.227 | 0.210  | 0.091  | 0.047  | 0.200  | 0.092  | 0.045  | 0.210  | -0.267 | 0.200  | -0.077 | 0.026  | 0.194  | 0.299  | 0.447   | 0.482  | <b>0.126</b>  |
| LC-OVWN        | 0.162  | 0.149  | 0.377  | 0.377  | 0.018  | 0.353  | 0.294  | 0.267  | 0.352  | 0.293  | 0.266  | 0.355  | -0.134 | 0.362  | 0.121  | 0.349  | 0.261  | 0.391  | 0.408   | 0.410  | <b>0.272</b>  |
| LC-OVWN5       | 0.211  | 0.207  | 0.497  | 0.497  | 0.086  | 0.463  | 0.412  | 0.362  | 0.463  | 0.407  | 0.359  | 0.465  | -0.103 | 0.465  | 0.176  | 0.510  | 0.329  | 0.545  | 0.508   | 0.541  | <b>0.370</b>  |
| LC-PBEB95      | -0.015 | -0.015 | 0.031  | 0.031  | -0.127 | 0.018  | 0.016  | 0.016  | 0.018  | 0.016  | 0.016  | 0.019  | -0.213 | 0.005  | -0.068 | 0.019  | -0.001 | 0.029  | 0.031   | 0.033  | <b>-0.007</b> |
| LC-PBEBRC      | 0.060  | 0.055  | 0.360  | 0.360  | -0.060 | 0.319  | 0.251  | 0.223  | 0.328  | 0.248  | 0.221  | 0.332  | -0.265 | 0.312  | 0.028  | 0.269  | 0.212  | 0.375  | 0.357   | 0.434  | <b>0.221</b>  |
| LC-PBEKCIS     | 0.019  | 0.012  | 0.183  | 0.183  | -0.105 | 0.197  | 0.132  | 0.111  | 0.195  | 0.131  | 0.111  | 0.188  | -0.281 | 0.154  | -0.035 | 0.127  | 0.102  | 0.181  | 0.180   | 0.205  | <b>0.099</b>  |
| LC-PBELYP      | -0.348 | -0.348 | -0.302 | -0.302 | -0.406 | -0.305 | -0.321 | -0.318 | -0.307 | -0.322 | -0.320 | -0.296 | -0.499 | -0.320 | -0.362 | -0.307 | -0.318 | -0.301 | -0.303  | -0.301 | <b>-0.330</b> |
| LC-PBEP86      | -0.175 | -0.176 | 0.431  | 0.432  | -0.241 | 0.195  | 0.078  | 0.038  | 0.187  | 0.077  | 0.036  | 0.207  | -0.275 | 0.173  | -0.089 | 0.009  | 0.180  | 0.276  | 0.414   | 0.439  | <b>0.111</b>  |
| LC-PBEPBE      | 0.144  | 0.132  | 0.572  | 0.569  | 0.026  | 0.484  | 0.459  | 0.378  | 0.498  | 0.457  | 0.377  | 0.495  | -0.184 | 0.436  | 0.117  | 0.457  | 0.342  | 0.562  | 0.570   | 0.589  | <b>0.374</b>  |
| LC-PBEPKZB     | 0.154  | 0.140  | 0.570  | 0.568  | 0.038  | 0.487  | 0.457  | 0.382  | 0.483  | 0.456  | 0.382  | 0.486  | -0.172 | 0.439  | 0.147  | 0.476  | 0.344  | 0.566  | 0.572   | 0.590  | <b>0.378</b>  |
| LC-PBEPL       | 0.207  | 0.203  | 0.494  | 0.494  | 0.073  | 0.463  | 0.389  | 0.354  | 0.457  | 0.389  | 0.353  | 0.455  | -0.111 | 0.457  | 0.171  | 0.480  | 0.328  | 0.529  | 0.523   | 0.558  | <b>0.363</b>  |
| LC-PBEPW91     | 0.120  | 0.110  | 0.545  | 0.544  | -0.012 | 0.472  | 0.393  | 0.311  | 0.471  | 0.392  | 0.319  | 0.485  | -0.207 | 0.420  | 0.075  | 0.402  | 0.330  | 0.535  | 0.554   | 0.580  | <b>0.342</b>  |
| LC-PBERRevTPSS | 0.092  | 0.086  | 0.498  | 0.494  | -0.042 | 0.434  | 0.321  | 0.251  | 0.434  | 0.301  | 0.237  | 0.435  | -0.214 | 0.392  | 0.041  | 0.389  | 0.302  | 0.463  | 0.506   | 0.546  | <b>0.298</b>  |
| LC-PBETPSS     | 0.143  | 0.137  | 0.570  | 0.571  | 0.030  | 0.485  | 0.457  | 0.383  | 0.483  | 0.458  | 0.382  | 0.487  | -0.175 | 0.440  | 0.145  | 0.485  | 0.344  | 0.565  | 0.572   | 0.595  | <b>0.378</b>  |
| LC-PBEVP86     | -0.172 | -0.174 | 0.446  | 0.446  | -0.238 | 0.182  | 0.081  | 0.038  | 0.179  | 0.080  | 0.035  | 0.193  | -0.191 | 0.180  | -0.087 | 0.015  | 0.185  | 0.279  | 0.413   | 0.441  | <b>0.117</b>  |
| LC-PBEVWN      | 0.162  | 0.149  | 0.383  | 0.383  | 0.016  | 0.353  | 0.294  | 0.268  | 0.353  | 0.293  | 0.268  | 0.355  | -0.140 | 0.356  | 0.119  | 0.337  | 0.262  | 0.395  | 0.383   | 0.413  | <b>0.270</b>  |
| LC-PBEVWN5     | 0.209  | 0.206  | 0.508  | 0.508  | 0.082  | 0.471  | 0.408  | 0.364  | 0.470  | 0.407  | 0.363  | 0.466  | -0.109 | 0.460  | 0.174  | 0.504  | 0.331  | 0.550  | 0.529   | 0.598  | <b>0.375</b>  |
| LC-PBEhB95     | -0.015 | -0.015 | 0.031  | 0.031  | -0.127 | 0.018  | 0.016  | 0.016  | 0.018  | 0.016  | 0.016  | 0.019  | -0.213 | 0.005  | -0.068 | 0.019  | -0.001 | 0.029  | 0.031   | 0.033  | <b>-0.007</b> |
| LC-PBEhBRC     | 0.060  | 0.055  | 0.360  | 0.360  | -0.059 | 0.324  | 0.250  | 0.226  | 0.318  | 0.247  | 0.221  | 0.327  | -0.265 | 0.312  | 0.027  | 0.267  | 0.213  | 0.364  | 0.358   | 0.434  | <b>0.220</b>  |
| LC-PBEhKCIS    | 0.019  | 0.012  | 0.183  | 0.183  | -0.106 | 0.197  | 0.133  | 0.112  | 0.196  | 0.130  | 0.111  | 0.188  | -0.280 | 0.155  | -0.036 | 0.126  | 0.100  | 0.176  | 0.177</ |        |               |

|                   |        |        |        |        |        |        |        |        |        |        |        |        |        |        |        |        |        |        |        |        |               |
|-------------------|--------|--------|--------|--------|--------|--------|--------|--------|--------|--------|--------|--------|--------|--------|--------|--------|--------|--------|--------|--------|---------------|
| LC-PBEhPKZB       | 0.152  | 0.140  | 0.565  | 0.563  | 0.035  | 0.489  | 0.459  | 0.382  | 0.490  | 0.457  | 0.379  | 0.490  | -0.158 | 0.469  | 0.136  | 0.476  | 0.347  | 0.565  | 0.572  | 0.594  | <b>0.380</b>  |
| LC-PBEhPL         | 0.207  | 0.203  | 0.505  | 0.505  | 0.077  | 0.478  | 0.397  | 0.360  | 0.478  | 0.393  | 0.357  | 0.456  | -0.113 | 0.458  | 0.172  | 0.477  | 0.328  | 0.532  | 0.523  | 0.547  | <b>0.367</b>  |
| LC-PBEhPW91       | 0.120  | 0.111  | 0.535  | 0.536  | -0.012 | 0.476  | 0.415  | 0.325  | 0.479  | 0.385  | 0.334  | 0.478  | -0.208 | 0.420  | 0.071  | 0.402  | 0.330  | 0.534  | 0.548  | 0.582  | <b>0.343</b>  |
| LC-PBEhRevTPSS    | 0.091  | 0.086  | 0.518  | 0.519  | -0.042 | 0.438  | 0.301  | 0.238  | 0.436  | 0.305  | 0.248  | 0.438  | -0.215 | 0.373  | 0.042  | 0.380  | 0.297  | 0.466  | 0.509  | 0.552  | <b>0.299</b>  |
| LC-PBEhTPSS       | 0.151  | 0.136  | 0.571  | 0.573  | 0.029  | 0.491  | 0.459  | 0.382  | 0.489  | 0.458  | 0.383  | 0.484  | -0.175 | 0.440  | 0.127  | 0.474  | 0.346  | 0.565  | 0.568  | 0.611  | <b>0.378</b>  |
| LC-PBEhVP86       | -0.173 | -0.175 | 0.446  | 0.443  | -0.239 | 0.181  | 0.081  | 0.038  | 0.177  | 0.079  | 0.038  | 0.192  | -0.274 | 0.202  | -0.087 | 0.014  | 0.186  | 0.242  | 0.375  | 0.443  | <b>0.109</b>  |
| LC-PBEhVWN        | 0.161  | 0.149  | 0.387  | 0.387  | 0.017  | 0.353  | 0.293  | 0.268  | 0.352  | 0.293  | 0.268  | 0.354  | -0.141 | 0.356  | 0.119  | 0.338  | 0.262  | 0.401  | 0.383  | 0.417  | <b>0.271</b>  |
| LC-PBEhVWN5       | 0.210  | 0.206  | 0.510  | 0.510  | 0.082  | 0.489  | 0.413  | 0.368  | 0.488  | 0.405  | 0.365  | 0.467  | -0.109 | 0.460  | 0.175  | 0.502  | 0.332  | 0.551  | 0.530  | 0.563  | <b>0.376</b>  |
| LC-PKZBB95        | 0.007  | 0.007  | 0.031  | 0.031  | -0.125 | 0.019  | 0.017  | 0.016  | 0.019  | 0.017  | 0.016  | 0.020  | -0.210 | 0.032  | -0.067 | 0.019  | -0.001 | 0.030  | 0.032  | 0.034  | <b>-0.003</b> |
| LC-PKZBBRC        | 0.071  | 0.066  | 0.371  | 0.371  | -0.049 | 0.355  | 0.288  | 0.239  | 0.354  | 0.276  | 0.238  | 0.356  | -0.253 | 0.331  | 0.039  | 0.288  | 0.221  | 0.387  | 0.372  | 0.443  | <b>0.238</b>  |
| LC-PKZBKClS       | 0.027  | 0.019  | 0.194  | 0.194  | -0.098 | 0.211  | 0.146  | 0.128  | 0.210  | 0.145  | 0.127  | 0.215  | -0.268 | 0.203  | -0.024 | 0.157  | 0.117  | 0.196  | 0.193  | 0.234  | <b>0.116</b>  |
| LC-PKZBLYP        | -0.334 | -0.334 | -0.286 | -0.285 | -0.395 | -0.291 | -0.305 | -0.304 | -0.292 | -0.307 | -0.305 | -0.282 | -0.489 | -0.308 | -0.350 | -0.291 | -0.304 | -0.286 | -0.287 | -0.286 | <b>-0.316</b> |
| LC-PKZBP86        | -0.157 | -0.159 | 0.440  | 0.438  | -0.226 | 0.213  | 0.089  | 0.053  | 0.211  | 0.087  | 0.052  | 0.235  | -0.264 | 0.203  | -0.081 | 0.031  | 0.198  | 0.304  | 0.415  | 0.451  | <b>0.127</b>  |
| LC-PKZBPBE        | 0.153  | 0.143  | 0.561  | 0.562  | 0.053  | 0.492  | 0.464  | 0.388  | 0.488  | 0.464  | 0.389  | 0.498  | -0.170 | 0.452  | 0.132  | 0.491  | 0.348  | 0.566  | 0.580  | 0.601  | <b>0.383</b>  |
| LC-PKZBPKZB       | 0.165  | 0.159  | 0.562  | 0.564  | 0.056  | 0.496  | 0.465  | 0.395  | 0.492  | 0.464  | 0.395  | 0.498  | -0.144 | 0.481  | 0.160  | 0.494  | 0.352  | 0.568  | 0.582  | 0.599  | <b>0.390</b>  |
| LC-PKZBPL         | 0.214  | 0.210  | 0.510  | 0.510  | 0.089  | 0.475  | 0.422  | 0.377  | 0.474  | 0.426  | 0.377  | 0.471  | -0.101 | 0.469  | 0.177  | 0.497  | 0.339  | 0.538  | 0.529  | 0.567  | <b>0.379</b>  |
| LC-PKZBPW91       | 0.132  | 0.122  | 0.556  | 0.557  | 0.015  | 0.492  | 0.451  | 0.371  | 0.478  | 0.443  | 0.368  | 0.490  | -0.190 | 0.425  | 0.087  | 0.479  | 0.336  | 0.561  | 0.569  | 0.592  | <b>0.367</b>  |
| LC-PKZBRevTPSS    | 0.101  | 0.096  | 0.519  | 0.518  | -0.033 | 0.452  | 0.388  | 0.281  | 0.450  | 0.359  | 0.277  | 0.449  | -0.199 | 0.413  | 0.053  | 0.390  | 0.308  | 0.495  | 0.531  | 0.549  | <b>0.320</b>  |
| LC-PKZBTPSS       | 0.168  | 0.162  | 0.580  | 0.566  | 0.054  | 0.501  | 0.466  | 0.394  | 0.498  | 0.465  | 0.394  | 0.532  | -0.147 | 0.483  | 0.155  | 0.494  | 0.350  | 0.566  | 0.574  | 0.630  | <b>0.394</b>  |
| LC-PKZBV86        | -0.155 | -0.156 | 0.450  | 0.449  | -0.222 | 0.210  | 0.106  | 0.057  | 0.211  | 0.105  | 0.075  | 0.215  | -0.263 | 0.265  | -0.072 | 0.033  | 0.203  | 0.306  | 0.426  | 0.454  | <b>0.135</b>  |
| LC-PKZBVWN        | 0.169  | 0.158  | 0.421  | 0.421  | 0.024  | 0.376  | 0.311  | 0.278  | 0.374  | 0.309  | 0.278  | 0.374  | -0.130 | 0.371  | 0.127  | 0.361  | 0.266  | 0.408  | 0.409  | 0.421  | <b>0.286</b>  |
| LC-PKZBVWN5       | 0.218  | 0.213  | 0.529  | 0.530  | 0.091  | 0.484  | 0.430  | 0.379  | 0.478  | 0.430  | 0.379  | 0.482  | -0.098 | 0.474  | 0.180  | 0.504  | 0.346  | 0.556  | 0.534  | 0.566  | <b>0.385</b>  |
| LC-PW91B95        | -0.015 | -0.015 | 0.031  | 0.031  | -0.127 | 0.018  | 0.016  | 0.016  | 0.018  | 0.016  | 0.016  | 0.019  | -0.213 | 0.005  | -0.067 | 0.019  | -0.001 | 0.029  | 0.031  | 0.033  | <b>-0.007</b> |
| LC-PW91BRC        | 0.060  | 0.055  | 0.359  | 0.359  | -0.059 | 0.317  | 0.246  | 0.221  | 0.316  | 0.247  | 0.219  | 0.319  | -0.265 | 0.308  | 0.028  | 0.269  | 0.212  | 0.375  | 0.357  | 0.434  | <b>0.219</b>  |
| LC-PW91KCIS       | 0.017  | 0.010  | 0.183  | 0.183  | -0.105 | 0.195  | 0.128  | 0.109  | 0.194  | 0.128  | 0.108  | 0.187  | -0.281 | 0.154  | -0.035 | 0.124  | 0.101  | 0.181  | 0.179  | 0.202  | <b>0.098</b>  |
| LC-PW91LYP        | -0.349 | -0.349 | -0.304 | -0.304 | -0.407 | -0.307 | -0.322 | -0.320 | -0.309 | -0.324 | -0.322 | -0.298 | -0.500 | -0.321 | -0.363 | -0.309 | -0.319 | -0.302 | -0.304 | -0.303 | <b>-0.332</b> |
| LC-PW91P86        | -0.174 | -0.177 | 0.433  | 0.434  | -0.239 | 0.187  | 0.078  | 0.041  | 0.178  | 0.075  | 0.037  | 0.197  | -0.275 | 0.177  | -0.090 | 0.008  | 0.180  | 0.275  | 0.413  | 0.439  | <b>0.110</b>  |
| LC-PW91PBE        | 0.148  | 0.133  | 0.569  | 0.569  | 0.027  | 0.494  | 0.456  | 0.374  | 0.482  | 0.456  | 0.372  | 0.496  | -0.184 | 0.459  | 0.103  | 0.451  | 0.344  | 0.563  | 0.570  | 0.588  | <b>0.374</b>  |
| LC-PW91PKZB       | 0.146  | 0.138  | 0.570  | 0.570  | 0.036  | 0.488  | 0.457  | 0.379  | 0.481  | 0.457  | 0.375  | 0.483  | -0.171 | 0.445  | 0.132  | 0.474  | 0.347  | 0.565  | 0.571  | 0.607  | <b>0.378</b>  |
| LC-PW91PL         | 0.207  | 0.203  | 0.494  | 0.494  | 0.076  | 0.455  | 0.387  | 0.352  | 0.455  | 0.387  | 0.349  | 0.454  | -0.111 | 0.456  | 0.172  | 0.478  | 0.328  | 0.513  | 0.505  | 0.556  | <b>0.360</b>  |
| LC-PW91PW91       | 0.119  | 0.112  | 0.544  | 0.543  | -0.012 | 0.483  | 0.390  | 0.338  | 0.469  | 0.359  | 0.311  | 0.485  | -0.206 | 0.419  | 0.080  | 0.400  | 0.330  | 0.536  | 0.557  | 0.580  | <b>0.342</b>  |
| LC-PW91RevTPSS    | 0.092  | 0.086  | 0.517  | 0.510  | -0.043 | 0.434  | 0.302  | 0.239  | 0.466  | 0.307  | 0.237  | 0.434  | -0.214 | 0.394  | 0.040  | 0.349  | 0.302  | 0.464  | 0.511  | 0.542  | <b>0.298</b>  |
| LC-PW91TPSS       | 0.140  | 0.137  | 0.570  | 0.571  | 0.030  | 0.490  | 0.459  | 0.379  | 0.479  | 0.457  | 0.379  | 0.489  | -0.174 | 0.440  | 0.120  | 0.489  | 0.344  | 0.563  | 0.572  | 0.606  | <b>0.377</b>  |
| LC-PW91VP86       | -0.173 | -0.174 | 0.439  | 0.438  | -0.237 | 0.181  | 0.082  | 0.039  | 0.176  | 0.081  | 0.038  | 0.194  | -0.274 | 0.188  | -0.088 | 0.014  | 0.187  | 0.278  | 0.414  | 0.439  | <b>0.112</b>  |
| LC-PW91VWN        | 0.161  | 0.148  | 0.382  | 0.382  | 0.016  | 0.352  | 0.293  | 0.266  | 0.351  | 0.292  | 0.266  | 0.353  | -0.141 | 0.355  | 0.117  | 0.334  | 0.262  | 0.393  | 0.380  | 0.411  | <b>0.269</b>  |
| LC-PW91VWN5       | 0.210  | 0.205  | 0.507  | 0.507  | 0.082  | 0.469  | 0.400  | 0.358  | 0.467  | 0.399  | 0.358  | 0.463  | -0.109 | 0.459  | 0.175  | 0.496  | 0.330  | 0.549  | 0.525  | 0.576  | <b>0.371</b>  |
| LC-RevTPSSB95     | 0.010  | 0.010  | 0.033  | 0.033  | -0.122 | 0.021  | 0.019  | 0.019  | 0.021  | 0.019  | 0.019  | 0.022  | -0.209 | 0.007  | -0.064 | 0.022  | 0.016  | 0.032  | 0.034  | 0.036  | <b>-0.001</b> |
| LC-RevTPSSBRC     | 0.074  | 0.070  | 0.390  | 0.390  | -0.046 | 0.343  | 0.252  | 0.226  | 0.342  | 0.251  | 0.225  | 0.344  | -0.251 | 0.306  | 0.041  | 0.282  | 0.225  | 0.384  | 0.387  | 0.434  | <b>0.233</b>  |
| LC-RevTPSSKClS    | 0.029  | 0.020  | 0.193  | 0.193  | -0.098 | 0.204  | 0.137  | 0.118  | 0.202  | 0.137  | 0.117  | 0.192  | -0.265 | 0.198  | -0.023 | 0.152  | 0.121  | 0.193  | 0.191  | 0.232  | <b>0.112</b>  |
| LC-RevTPSSLYP     | -0.341 | -0.342 | -0.298 | -0.297 | -0.401 | -0.303 | -0.318 | -0.317 | -0.305 | -0.320 | -0.318 | -0.294 | -0.492 | -0.320 | -0.358 | -0.304 | -0.313 | -0.298 | -0.299 | -0.298 | <b>-0.327</b> |
| LC-RevTPSSP86     | -0.151 | -0.157 | 0.444  | 0.441  | -0.222 | 0.193  | 0.090  | 0.051  | 0.194  | 0.093  | 0.048  | 0.212  | -0.264 | 0.234  | -0.074 | 0.053  | 0.199  | 0.262  | 0.436  | 0.462  | <b>0.127</b>  |
| LC-RevTPSSPBE     | 0.163  | 0.153  | 0.544  | 0.544  | 0.055  | 0.531  | 0.459  | 0.380  | 0.512  | 0.457  | 0.374  | 0.514  | -0.153 | 0.427  | 0.138  | 0.480  | 0.377  | 0.566  | 0.576  | 0.572  | <b>0.383</b>  |
| LC-RevTPSSPKZB    | 0.184  | 0.178  | 0.547  | 0.546  | 0.058  | 0.518  | 0.462  | 0.384  | 0.517  | 0.461  | 0.380  | 0.540  | -0.141 | 0.439  | 0.147  | 0.498  | 0.378  | 0.565  | 0.578  | 0.573  | <b>0.391</b>  |
| LC-RevTPSSPL      | 0.218  | 0.214  | 0.499  | 0.499  | 0.093  | 0.459  | 0.397  | 0.358  | 0.458  | 0.394  | 0.358  | 0.461  | -0.093 | 0.465  | 0.178  | 0.490  | 0.345  | 0.510  | 0.520  | 0.546  | <b>0.369</b>  |
| LC-RevTPSSPW91    | 0.142  | 0.139  | 0.564  | 0.563  | 0.023  | 0.476  | 0.393  | 0.342  | 0.476  | 0.385  | 0.320  | 0.476  | -0.187 | 0.425  | 0.092  | 0.430  | 0.342  | 0.542  | 0.570  | 0.587  | <b>0.355</b>  |
| LC-RevTPSSRevTPSS | 0.107  | 0.102  | 0.492  | 0.493  | -0.017 | 0.444  | 0.317  | 0.255  | 0.417  | 0.317  | 0.254  | 0.446  | -0.196 | 0.391  | 0.058  | 0.391  | 0.310  | 0.494  | 0.521  | 0.549  | <b>0.307</b>  |
| LC-RevTPSSTPSS    | 0.171  | 0.172  | 0.545  | 0.544  | 0.058  | 0.515  | 0.460  | 0.383  | 0.515  | 0.460  | 0.382  | 0.544  | -0.143 | 0.441  | 0.143  | 0.481  | 0.376  | 0.568  | 0.579  | 0.570  | <b>0.388</b>  |
| LC-RevTPSSVP86    | -0.146 | -0.154 | 0.397  | 0.439  | -0.220 | 0.220  | 0.087  | 0.053  | 0.214  | 0.086  | 0.051  | 0.219  | -0.262 | 0.318  | -0.071 | 0.054  | 0.202  | 0.265  | 0.435  | 0.460  | <b>0.132</b>  |
| LC-RevTPSSVWN     | 0.172  | 0.161  | 0.394  | 0.394  | 0.026  | 0.363  | 0.295  | 0.268  | 0.362  | 0.294  | 0.267  | 0.365  | -0.126 | 0.375  | 0.128  | 0.356  | 0.265  | 0.410  | 0.396  | 0.420  | <b>0.279</b>  |
| LC-RevTPSSVWN5    | 0.221  | 0.218  | 0.503  | 0.503  | 0.095  | 0.463  | 0.408  | 0.368  | 0.462  | 0.408  | 0.368  | 0.464  | -0.090 | 0.473  | 0.183  | 0.495  | 0.349  | 0.526  | 0.525  | 0.538  | <b>0.374</b>  |
| LC-SB95           | -0.007 | -0.018 | 0.028  | 0.028  | -0.152 | 0.015  | 0.014  | 0.013  | 0.015  | 0.014  | 0.013  | 0.016  | -0.217 | 0.002  | -0.070 | 0.016  | -0.003 | 0.027  | 0.029  | 0.031  | <b>-0.010</b> |
| LC-SBRC           | 0.061  | 0.056  | 0.379  | 0.379  | -0.058 | 0.343  | 0.252  | 0.227  | 0.338  | 0.248  | 0.226  | 0.363  | -0.264 | 0.314  | 0.027  | 0.261  | 0.215  | 0.381  | 0.372  | 0.439  | <b>0.228</b>  |
| LC-SKClS          | 0.020  | 0.010  | 0.189  | 0.189  | -0.103 | 0.200  | 0.132  | 0.112  | 0.199  | 0.131  | 0.110  | 0.191  | -0.280 | 0.156  | -0.037 | 0.134  | 0.103  | 0.187  | 0.184  | 0.224  | <b>0.102</b>  |
| LC-SLYP           | -0.346 | -0.346 | -0.297 | -0.297 | -0.404 | -0.302 | -0.317 | -0.315 | -0.304 | -0.319 |        |        |        |        |        |        |        |        |        |        |               |

|                |        |        |        |        |        |        |        |        |        |        |        |        |        |        |        |        |        |        |        |        |               |
|----------------|--------|--------|--------|--------|--------|--------|--------|--------|--------|--------|--------|--------|--------|--------|--------|--------|--------|--------|--------|--------|---------------|
| LC-SPL         | 0.206  | 0.202  | 0.507  | 0.507  | 0.081  | 0.482  | 0.406  | 0.354  | 0.477  | 0.404  | 0.350  | 0.488  | -0.109 | 0.452  | 0.171  | 0.446  | 0.331  | 0.526  | 0.522  | 0.543  | <b>0.367</b>  |
| LC-SPW91       | 0.116  | 0.108  | 0.571  | 0.571  | -0.020 | 0.475  | 0.408  | 0.311  | 0.472  | 0.389  | 0.310  | 0.474  | -0.206 | 0.415  | 0.063  | 0.412  | 0.331  | 0.571  | 0.550  | 0.580  | <b>0.345</b>  |
| LC-SRevTPSS    | 0.086  | 0.080  | 0.483  | 0.483  | -0.042 | 0.474  | 0.307  | 0.236  | 0.471  | 0.300  | 0.278  | 0.456  | -0.214 | 0.359  | 0.034  | 0.313  | 0.305  | 0.467  | 0.475  | 0.552  | <b>0.295</b>  |
| LC-STPSS       | 0.138  | 0.132  | 0.581  | 0.581  | 0.033  | 0.480  | 0.458  | 0.374  | 0.479  | 0.459  | 0.371  | 0.487  | -0.175 | 0.421  | 0.127  | 0.463  | 0.344  | 0.556  | 0.562  | 0.582  | <b>0.373</b>  |
| LC-SVP86       | -0.176 | -0.177 | 0.447  | 0.447  | -0.240 | 0.178  | 0.082  | 0.007  | 0.183  | 0.079  | 0.011  | 0.199  | -0.313 | 0.175  | -0.099 | 0.011  | 0.071  | 0.289  | 0.417  | 0.468  | <b>0.103</b>  |
| LC-SVWN5       | 0.208  | 0.205  | 0.524  | 0.524  | 0.085  | 0.484  | 0.412  | 0.357  | 0.482  | 0.409  | 0.356  | 0.491  | -0.106 | 0.455  | 0.174  | 0.451  | 0.345  | 0.546  | 0.526  | 0.586  | <b>0.376</b>  |
| LC-TPSSB95     | 0.009  | 0.009  | 0.033  | 0.033  | -0.123 | 0.021  | 0.019  | 0.018  | 0.021  | 0.019  | 0.018  | 0.021  | -0.193 | 0.007  | -0.064 | 0.021  | 0.002  | 0.031  | 0.033  | 0.035  | <b>-0.001</b> |
| LC-TPSSBRC     | 0.069  | 0.065  | 0.390  | 0.390  | -0.050 | 0.318  | 0.246  | 0.222  | 0.327  | 0.245  | 0.221  | 0.329  | -0.256 | 0.305  | 0.037  | 0.275  | 0.221  | 0.383  | 0.372  | 0.433  | <b>0.227</b>  |
| LC-TPSSKCIS    | 0.024  | 0.017  | 0.190  | 0.190  | -0.100 | 0.198  | 0.131  | 0.112  | 0.196  | 0.131  | 0.111  | 0.187  | -0.270 | 0.195  | -0.027 | 0.146  | 0.117  | 0.186  | 0.187  | 0.213  | <b>0.107</b>  |
| LC-TPSSLYP     | -0.346 | -0.346 | -0.303 | -0.303 | -0.405 | -0.308 | -0.323 | -0.320 | -0.309 | -0.324 | -0.322 | -0.299 | -0.496 | -0.323 | -0.361 | -0.308 | -0.318 | -0.302 | -0.305 | -0.303 | <b>-0.331</b> |
| LC-TPSSP86     | -0.158 | -0.163 | 0.442  | 0.439  | -0.227 | 0.188  | 0.083  | 0.043  | 0.184  | 0.097  | 0.040  | 0.192  | -0.267 | 0.188  | -0.079 | 0.024  | 0.194  | 0.294  | 0.428  | 0.455  | <b>0.120</b>  |
| LC-TPSSPBE     | 0.159  | 0.151  | 0.542  | 0.541  | 0.040  | 0.484  | 0.454  | 0.373  | 0.484  | 0.452  | 0.370  | 0.510  | -0.171 | 0.421  | 0.131  | 0.480  | 0.352  | 0.532  | 0.575  | 0.597  | <b>0.374</b>  |
| LC-TPSSPKZB    | 0.165  | 0.160  | 0.544  | 0.544  | 0.056  | 0.486  | 0.458  | 0.378  | 0.508  | 0.457  | 0.375  | 0.481  | -0.146 | 0.427  | 0.142  | 0.485  | 0.376  | 0.532  | 0.577  | 0.595  | <b>0.380</b>  |
| LC-TPSSPL      | 0.215  | 0.211  | 0.496  | 0.496  | 0.090  | 0.457  | 0.392  | 0.353  | 0.457  | 0.389  | 0.350  | 0.459  | -0.101 | 0.464  | 0.177  | 0.485  | 0.331  | 0.507  | 0.498  | 0.532  | <b>0.363</b>  |
| LC-TPSSPW91    | 0.141  | 0.122  | 0.564  | 0.563  | 0.018  | 0.474  | 0.374  | 0.329  | 0.481  | 0.379  | 0.327  | 0.475  | -0.192 | 0.404  | 0.089  | 0.421  | 0.339  | 0.523  | 0.568  | 0.585  | <b>0.349</b>  |
| LC-TPSSRevTPSS | 0.103  | 0.098  | 0.488  | 0.486  | -0.031 | 0.448  | 0.304  | 0.242  | 0.474  | 0.304  | 0.218  | 0.444  | -0.201 | 0.382  | 0.052  | 0.391  | 0.307  | 0.498  | 0.516  | 0.549  | <b>0.304</b>  |
| LC-TPSSTPSS    | 0.158  | 0.152  | 0.542  | 0.542  | 0.044  | 0.487  | 0.459  | 0.378  | 0.505  | 0.458  | 0.375  | 0.506  | -0.148 | 0.429  | 0.140  | 0.475  | 0.376  | 0.531  | 0.576  | 0.570  | <b>0.378</b>  |
| LC-TPSSVP86    | -0.156 | -0.161 | 0.435  | 0.435  | -0.225 | 0.195  | 0.083  | 0.049  | 0.193  | 0.082  | 0.047  | 0.211  | -0.266 | 0.194  | -0.075 | 0.026  | 0.197  | 0.296  | 0.432  | 0.462  | <b>0.123</b>  |
| LC-TPSSVWN     | 0.168  | 0.157  | 0.385  | 0.385  | 0.024  | 0.351  | 0.292  | 0.263  | 0.350  | 0.291  | 0.262  | 0.357  | -0.131 | 0.369  | 0.124  | 0.344  | 0.263  | 0.399  | 0.386  | 0.415  | <b>0.273</b>  |
| LC-TPSSSVWN5   | 0.218  | 0.215  | 0.499  | 0.499  | 0.092  | 0.460  | 0.401  | 0.356  | 0.458  | 0.400  | 0.356  | 0.463  | -0.095 | 0.469  | 0.181  | 0.489  | 0.342  | 0.523  | 0.503  | 0.575  | <b>0.370</b>  |
| LC-XaB95       | -0.007 | -0.007 | 0.029  | 0.029  | -0.145 | 0.015  | 0.014  | -0.006 | 0.015  | 0.014  | 0.013  | 0.016  | -0.218 | 0.026  | -0.069 | 0.017  | -0.003 | 0.027  | 0.029  | 0.030  | <b>-0.009</b> |
| LC-XaBRC       | 0.059  | 0.053  | 0.368  | 0.368  | -0.061 | 0.310  | 0.235  | 0.216  | 0.307  | 0.233  | 0.215  | 0.313  | -0.267 | 0.294  | 0.024  | 0.256  | 0.212  | 0.382  | 0.368  | 0.432  | <b>0.216</b>  |
| LC-XaKCIS      | 0.015  | 0.007  | 0.181  | 0.181  | -0.106 | 0.171  | 0.120  | 0.100  | 0.170  | 0.119  | 0.099  | 0.177  | -0.282 | 0.143  | -0.039 | 0.114  | 0.097  | 0.175  | 0.177  | 0.199  | <b>0.091</b>  |
| LC-XaLYP       | -0.361 | -0.361 | -0.318 | -0.318 | -0.417 | -0.322 | -0.337 | -0.335 | -0.324 | -0.339 | -0.337 | -0.312 | -0.508 | -0.336 | -0.374 | -0.324 | -0.333 | -0.318 | -0.319 | -0.319 | <b>-0.346</b> |
| LC-XaP86       | -0.182 | -0.184 | 0.440  | 0.440  | -0.248 | 0.171  | 0.074  | -0.007 | 0.170  | 0.052  | -0.001 | 0.179  | -0.281 | 0.188  | -0.095 | 0.000  | 0.181  | 0.284  | 0.387  | 0.442  | <b>0.101</b>  |
| LC-XaPBE       | 0.135  | 0.129  | 0.567  | 0.568  | 0.029  | 0.480  | 0.404  | 0.339  | 0.500  | 0.401  | 0.340  | 0.478  | -0.184 | 0.415  | 0.106  | 0.455  | 0.344  | 0.560  | 0.553  | 0.585  | <b>0.360</b>  |
| LC-XaPKZB      | 0.141  | 0.135  | 0.569  | 0.569  | 0.035  | 0.478  | 0.455  | 0.345  | 0.478  | 0.440  | 0.345  | 0.478  | -0.171 | 0.422  | 0.132  | 0.460  | 0.346  | 0.563  | 0.554  | 0.587  | <b>0.368</b>  |
| LC-XaPL        | 0.204  | 0.200  | 0.489  | 0.489  | 0.070  | 0.464  | 0.381  | 0.335  | 0.463  | 0.380  | 0.334  | 0.461  | -0.113 | 0.445  | 0.172  | 0.439  | 0.328  | 0.501  | 0.497  | 0.518  | <b>0.353</b>  |
| LC-XaPW91      | 0.118  | 0.111  | 0.546  | 0.543  | -0.022 | 0.471  | 0.342  | 0.319  | 0.471  | 0.354  | 0.289  | 0.471  | -0.206 | 0.430  | 0.063  | 0.371  | 0.336  | 0.533  | 0.526  | 0.579  | <b>0.332</b>  |
| LC-XaRevTPSS   | 0.088  | 0.082  | 0.473  | 0.472  | -0.042 | 0.439  | 0.349  | 0.285  | 0.459  | 0.314  | 0.229  | 0.445  | -0.216 | 0.393  | 0.036  | 0.309  | 0.308  | 0.470  | 0.467  | 0.549  | <b>0.295</b>  |
| LC-XaTPSS      | 0.139  | 0.133  | 0.571  | 0.571  | 0.035  | 0.481  | 0.455  | 0.353  | 0.479  | 0.456  | 0.354  | 0.481  | -0.174 | 0.426  | 0.138  | 0.460  | 0.345  | 0.562  | 0.549  | 0.587  | <b>0.370</b>  |
| BB1K           | 0.170  | 0.170  | 0.174  | 0.174  | 0.140  | 0.231  | 0.229  | 0.229  | 0.312  | 0.229  | 0.229  | 0.232  | 0.145  | 0.436  | 0.169  | 0.237  | 0.173  | 0.174  | 0.174  | 0.174  | <b>0.210</b>  |
| mPW1K          | 0.388  | 0.379  | 0.521  | 0.521  | 0.241  | 0.494  | 0.441  | 0.386  | 0.493  | 0.440  | 0.385  | 0.490  | 0.067  | 0.418  | 0.307  | 0.533  | 0.450  | 0.549  | 0.532  | 0.540  | <b>0.429</b>  |
| mPW1B95        | 0.075  | 0.074  | 0.114  | 0.114  | -0.012 | 0.118  | 0.102  | 0.101  | 0.118  | 0.102  | 0.101  | 0.119  | -0.120 | 0.105  | 0.069  | 0.107  | 0.111  | 0.131  | 0.114  | 0.115  | <b>0.088</b>  |
| mPWB1K         | 0.071  | 0.071  | 0.086  | 0.086  | -0.040 | 0.080  | 0.075  | 0.074  | 0.080  | 0.074  | 0.073  | 0.104  | -0.104 | 0.054  | 0.043  | 0.074  | 0.083  | 0.085  | 0.086  | 0.086  | <b>0.062</b>  |
| mPW1KCIS       | 0.249  | 0.243  | 0.401  | 0.401  | 0.113  | 0.373  | 0.347  | 0.326  | 0.373  | 0.346  | 0.326  | 0.377  | -0.026 | 0.360  | 0.183  | 0.412  | 0.301  | 0.424  | 0.398  | 0.419  | <b>0.317</b>  |
| mPWKCIS1K      | 0.241  | 0.236  | 0.367  | 0.367  | 0.112  | 0.320  | 0.281  | 0.261  | 0.318  | 0.280  | 0.260  | 0.324  | -0.026 | 0.313  | 0.182  | 0.357  | 0.293  | 0.386  | 0.367  | 0.374  | <b>0.281</b>  |
| TPSS1KCIS      | 0.107  | 0.104  | 0.174  | 0.174  | -0.001 | 0.172  | 0.143  | 0.133  | 0.172  | 0.142  | 0.132  | 0.178  | -0.111 | 0.180  | 0.058  | 0.192  | 0.135  | 0.190  | 0.173  | 0.174  | <b>0.131</b>  |
| PBE1KCIS       | -0.044 | -0.047 | 0.036  | 0.036  | -0.129 | 0.029  | 0.008  | 0.001  | 0.027  | 0.006  | 0.000  | 0.038  | -0.238 | 0.029  | -0.082 | 0.030  | 0.000  | 0.035  | 0.031  | 0.034  | <b>-0.010</b> |
| mPWLYP1M       | -0.114 | -0.116 | -0.028 | -0.028 | -0.195 | -0.027 | -0.053 | -0.056 | -0.029 | -0.054 | -0.058 | -0.012 | -0.330 | -0.018 | -0.146 | -0.016 | -0.070 | -0.023 | -0.029 | -0.024 | <b>-0.071</b> |
| PBE1W          | -0.012 | -0.016 | 0.070  | 0.071  | -0.104 | 0.073  | 0.044  | 0.030  | 0.071  | 0.043  | 0.027  | 0.085  | -0.211 | 0.084  | -0.055 | 0.077  | 0.017  | 0.074  | 0.068  | 0.069  | <b>0.025</b>  |
| mPWLYP1W       | -0.053 | -0.056 | 0.048  | 0.048  | -0.140 | 0.049  | 0.027  | 0.018  | 0.048  | 0.025  | 0.017  | 0.070  | -0.292 | 0.055  | -0.089 | 0.068  | -0.002 | 0.055  | 0.047  | 0.054  | <b>0.000</b>  |
| PBELYP1W       | -0.169 | -0.171 | -0.114 | -0.114 | -0.238 | -0.111 | -0.129 | -0.131 | -0.112 | -0.130 | -0.133 | -0.098 | -0.336 | -0.094 | -0.196 | -0.106 | -0.142 | -0.114 | -0.114 | -0.114 | <b>-0.143</b> |
| TPSSLYP1W      | -0.094 | -0.095 | -0.040 | -0.041 | -0.177 | -0.043 | -0.063 | -0.065 | -0.045 | -0.065 | -0.067 | -0.030 | -0.279 | -0.018 | -0.129 | -0.023 | -0.071 | -0.035 | -0.040 | -0.042 | <b>-0.073</b> |
| mPW3LYP        | -0.131 | -0.132 | -0.062 | -0.061 | -0.207 | -0.072 | -0.096 | -0.098 | -0.073 | -0.098 | -0.100 | -0.059 | -0.326 | -0.067 | -0.160 | -0.064 | -0.092 | -0.061 | -0.063 | -0.060 | <b>-0.104</b> |
| PBEPBE-D2      | -0.208 | -0.211 | -0.158 | -0.158 | -0.261 | -0.147 | -0.167 | -0.169 | -0.148 | -0.169 | -0.171 | -0.132 | -0.342 | -0.150 | -0.229 | -0.157 | -0.182 | -0.161 | -0.160 | -0.158 | <b>-0.182</b> |
| BLYP-D2        | 0.041  | -0.078 | 0.248  | 0.248  | -0.147 | 0.351  | 0.266  | 0.261  | 0.349  | 0.302  | 0.260  | 0.364  | -0.268 | 0.248  | 0.037  | 0.359  | 0.132  | 0.339  | 0.246  | 0.333  | <b>0.194</b>  |
| B3LYP-D2       | -0.170 | -0.175 | -0.089 | -0.090 | -0.224 | -0.085 | -0.109 | -0.108 | -0.086 | -0.112 | -0.109 | -0.075 | -0.323 | -0.087 | -0.171 | -0.088 | -0.113 | -0.095 | -0.092 | -0.093 | <b>-0.125</b> |
| BP86-D2        | 0.988  | 0.990  | 1.385  | 1.414  | 0.570  | 1.149  | 1.105  | 1.033  | 1.145  | 1.096  | 1.026  | 1.283  | 0.367  | 1.201  | 0.682  | 1.295  | 1.036  | 1.316  | 1.288  | 1.403  | <b>1.089</b>  |
| TPSSTPSS-D2    | -0.109 | -0.112 | -0.044 | -0.045 | -0.171 | -0.054 | -0.077 | -0.077 | -0.056 | -0.079 | -0.079 | -0.040 | -0.255 | -0.052 | -0.132 | -0.039 | -0.090 | -0.043 | -0.061 | -0.050 | <b>-0.083</b> |
| PBEPBE-D3      | -0.115 | -0.118 | -0.050 | -0.050 | -0.188 | -0.046 | -0.068 | -0.076 | -0.047 | -0.070 | -0.077 | -0.035 | -0.284 | -0.043 | -0.148 | -0.050 | -0.090 | -0.050 | -0.053 | -0.051 | <b>-0.086</b> |
| BLYP-D3        | -0.067 | -0.090 | 0.176  | 0.174  | -0.169 | 0.368  | 0.148  | 0.163  | 0.367  | 0.215  | 0.170  | 0.379  | -0.285 | 0.203  | -0.100 | 0.256  | -0.017 | 0.211  | 0.176  | 0.203  | <b>0.124</b>  |
| B3LYP-D3       | -0.099 | -0.104 | -0.011 | -0.012 | -0.193 | -0.003 | -0.036 | -0.041 | -0.004 | -0.037 | -0.042 | 0.007  | -0.300 | 0.009  | -0.138 | -0.022 | -0.052 | -0.009 | -0.012 | -0.013 | <b>-0.056</b> |
| BP86-D3        | 0.841  | 0.840  | 1.182  | 1.182  | 0.461  | 0.964  | 0.943  | 0.872  | 0.968  | 0.943  | 0.872  | 0.979  | 0.302  | 1.134  | 0.586  | 1.094  | 0.838  | 1.193  | 1.126  | 1      |               |

|                           |        |        |        |        |        |        |        |        |        |        |        |        |        |        |        |        |        |        |        |        |               |
|---------------------------|--------|--------|--------|--------|--------|--------|--------|--------|--------|--------|--------|--------|--------|--------|--------|--------|--------|--------|--------|--------|---------------|
| <b>B3PW91-D3</b>          | 0.480  | 0.479  | 0.688  | 0.662  | 0.253  | 0.615  | 0.535  | 0.478  | 0.613  | 0.535  | 0.477  | 0.592  | 0.133  | 0.562  | 0.383  | 0.731  | 0.514  | 0.718  | 0.653  | 0.759  | <b>0.543</b>  |
| <b>BMK-D3</b>             | 0.770  | 0.750  | 1.011  | 1.011  | 0.553  | 0.926  | 0.775  | 0.769  | 0.769  | 0.772  | 0.788  | 0.788  | 0.329  | 0.848  | 0.641  | 0.858  | 0.867  | 0.924  | 0.962  | 0.969  | <b>0.804</b>  |
| <b>CAM-B3LYP-D3</b>       | -0.259 | -0.260 | -0.193 | -0.193 | -0.320 | -0.203 | -0.222 | -0.220 | -0.205 | -0.224 | -0.222 | -0.190 | -0.418 | -0.210 | -0.275 | -0.200 | -0.219 | -0.196 | -0.196 | -0.193 | <b>-0.231</b> |
| <b>LC-wPBE-D3</b>         | 0.006  | 0.003  | 0.157  | 0.157  | -0.113 | 0.162  | 0.125  | 0.112  | 0.161  | 0.124  | 0.108  | 0.167  | -0.242 | 0.131  | -0.039 | 0.140  | 0.084  | 0.173  | 0.155  | 0.166  | <b>0.087</b>  |
| <b>M05-D3</b>             | -0.235 | -0.235 | -0.216 | -0.216 | -0.318 | -0.226 | -0.235 | -0.231 | -0.227 | -0.237 | -0.232 | -0.219 | -0.404 | -0.280 | -0.273 | -0.200 | -0.221 | -0.195 | -0.205 | -0.199 | <b>-0.240</b> |
| <b>M052X-D3</b>           | -0.112 | -0.113 | -0.079 | -0.079 | -0.194 | -0.110 | -0.123 | -0.122 | -0.112 | -0.124 | -0.123 | -0.096 | -0.277 | -0.105 | -0.152 | -0.103 | -0.080 | -0.078 | -0.080 | -0.080 | <b>-0.117</b> |
| <b>M06-D3</b>             | 0.054  | 0.054  | 0.171  | 0.171  | 0.015  | 0.125  | 0.062  | 0.060  | 0.125  | 0.061  | 0.060  | 0.126  | -0.030 | 0.043  | 0.040  | 0.116  | 0.162  | 0.168  | 0.170  | 0.117  | <b>0.093</b>  |
| <b>M06L-D3</b>            | 0.107  | 0.107  | 0.133  | 0.133  | 0.050  | 0.105  | 0.078  | 0.075  | 0.105  | 0.078  | 0.051  | 0.107  | -0.052 | 0.069  | 0.090  | 0.050  | 0.132  | 0.090  | 0.104  | 0.116  | <b>0.086</b>  |
| <b>M06HF-D3</b>           | 0.115  | 0.115  | 0.128  | 0.128  | 0.076  | 0.128  | 0.124  | 0.121  | 0.128  | 0.124  | 0.121  | 0.128  | -0.024 | 0.095  | 0.108  | 0.126  | 0.125  | 0.193  | 0.126  | 0.120  | <b>0.115</b>  |
| <b>M062X-D3</b>           | 0.059  | 0.058  | 0.132  | 0.132  | -0.043 | 0.093  | 0.074  | 0.080  | 0.092  | 0.083  | 0.079  | 0.096  | -0.254 | -0.025 | 0.015  | 0.098  | 0.105  | 0.142  | 0.132  | 0.139  | <b>0.064</b>  |
| <b>PBEPBE-D3BJ</b>        | -0.120 | -0.124 | -0.047 | -0.047 | -0.194 | -0.044 | -0.070 | -0.077 | -0.045 | -0.072 | -0.079 | -0.033 | -0.292 | -0.045 | -0.152 | -0.045 | -0.094 | -0.048 | -0.055 | -0.049 | <b>-0.087</b> |
| <b>BLYP-D3BJ</b>          | 0.141  | 0.115  | 0.403  | 0.404  | 0.004  | 0.430  | 0.336  | 0.313  | 0.464  | 0.338  | 0.312  | 0.478  | -0.127 | 0.358  | 0.122  | 0.528  | 0.208  | 0.561  | 0.393  | 0.540  | <b>0.316</b>  |
| <b>B3LYP-D3BJ</b>         | -0.033 | -0.043 | 0.082  | 0.083  | -0.143 | 0.165  | 0.106  | 0.085  | 0.163  | 0.121  | 0.089  | 0.172  | -0.256 | 0.131  | -0.084 | 0.151  | 0.012  | 0.077  | 0.073  | 0.164  | <b>0.056</b>  |
| <b>BP86-D3BJ</b>          | 0.893  | 0.893  | 1.153  | 1.152  | 0.588  | 0.982  | 0.944  | 0.902  | 0.958  | 0.936  | 0.898  | 1.002  | 0.536  | 1.003  | 0.788  | 1.103  | 0.933  | 1.130  | 1.163  | 1.207  | <b>0.958</b>  |
| <b>TPSSTPSS-D3BJ</b>      | 0.029  | 0.026  | 0.069  | 0.069  | -0.089 | 0.072  | 0.055  | 0.045  | 0.071  | 0.054  | 0.040  | 0.077  | -0.147 | 0.093  | -0.038 | 0.071  | 0.036  | 0.071  | 0.067  | 0.067  | <b>0.037</b>  |
| <b>PBE1PBE-D3BJ</b>       | -0.067 | -0.071 | 0.002  | 0.002  | -0.150 | -0.006 | -0.036 | -0.048 | -0.008 | -0.037 | -0.049 | 0.002  | -0.244 | -0.006 | -0.107 | -0.008 | -0.042 | 0.001  | -0.001 | 0.000  | <b>-0.044</b> |
| <b>BPBE-D3BJ</b>          | 0.762  | 0.762  | 0.987  | 0.987  | 0.502  | 0.880  | 0.859  | 0.799  | 0.880  | 0.860  | 0.797  | 0.888  | 0.435  | 0.877  | 0.654  | 1.036  | 0.875  | 1.120  | 0.978  | 1.110  | <b>0.852</b>  |
| <b>B3PW91-D3BJ</b>        | 0.543  | 0.541  | 0.788  | 0.788  | 0.345  | 0.610  | 0.609  | 0.564  | 0.639  | 0.609  | 0.563  | 0.646  | 0.297  | 0.666  | 0.452  | 0.799  | 0.568  | 0.828  | 0.815  | 0.868  | <b>0.627</b>  |
| <b>BMK-D3BJ</b>           | 0.867  | 0.868  | 1.186  | 1.193  | 0.827  | 0.883  | 0.880  | 0.850  | 0.885  | 0.876  | 0.849  | 1.029  | 0.482  | 0.804  | 0.791  | 0.995  | 1.103  | 1.023  | 1.045  | 1.107  | <b>0.927</b>  |
| <b>CAM-B3LYP-D3BJ</b>     | -0.173 | -0.174 | -0.096 | -0.096 | -0.253 | -0.108 | -0.130 | -0.131 | -0.109 | -0.132 | -0.133 | -0.098 | -0.367 | -0.113 | -0.201 | -0.104 | -0.130 | -0.096 | -0.098 | -0.094 | <b>-0.142</b> |
| <b>LC-wPBE-D3BJ</b>       | 0.070  | 0.064  | 0.220  | 0.220  | -0.054 | 0.230  | 0.181  | 0.172  | 0.230  | 0.190  | 0.177  | 0.225  | -0.180 | 0.227  | 0.022  | 0.212  | 0.128  | 0.234  | 0.218  | 0.262  | <b>0.152</b>  |
| <b>B2PLYP</b>             | 0.209  | 0.190  | 0.472  | 0.471  | 0.401  | 0.599  | 0.387  | 0.264  | 0.623  | 0.441  | 0.258  | 1.082  | -0.092 | 0.256  | 0.175  | 0.280  | 0.287  | 0.214  | 0.338  | 0.199  | <b>0.353</b>  |
| <b>B2PLYP(Full)</b>       | 0.190  | 0.173  | 0.449  | 0.449  | 0.392  | 0.747  | 0.373  | 0.216  | 0.725  | 0.337  | 0.208  | 0.998  | -0.094 | 0.241  | 0.159  | 0.141  | 0.275  | 0.175  | 0.283  | 0.122  | <b>0.328</b>  |
| <b>B2PLYPD</b>            | -0.089 | -0.099 | -0.044 | -0.045 | -0.145 | -0.019 | -0.068 | -0.081 | -0.040 | -0.076 | -0.089 | 0.096  | -0.253 | -0.056 | -0.110 | -0.089 | -0.067 | -0.099 | -0.063 | -0.095 | <b>-0.077</b> |
| <b>B2PLYPD(Full)</b>      | -0.096 | -0.107 | -0.048 | -0.049 | -0.146 | -0.022 | -0.073 | -0.093 | -0.045 | -0.081 | -0.104 | 0.093  | -0.255 | -0.060 | -0.120 | -0.112 | -0.075 | -0.105 | -0.072 | -0.116 | <b>-0.084</b> |
| <b>B2PLYP-D3</b>          | -0.055 | -0.065 | 0.026  | 0.026  | -0.122 | 0.056  | -0.029 | -0.051 | 0.048  | -0.039 | -0.060 | 0.172  | -0.251 | -0.011 | -0.079 | -0.049 | -0.027 | -0.048 | -0.012 | -0.045 | <b>-0.031</b> |
| <b>B2PLYP-D3(Full)</b>    | -0.061 | -0.071 | 0.019  | 0.013  | -0.124 | 0.055  | -0.034 | -0.075 | 0.047  | -0.046 | -0.085 | 0.170  | -0.254 | -0.018 | -0.097 | -0.074 | -0.042 | -0.055 | -0.039 | -0.068 | <b>-0.042</b> |
| <b>B2PLYPD3</b>           | 0.002  | -0.007 | 0.053  | 0.053  | -0.084 | 0.173  | 0.025  | 0.002  | 0.146  | 0.015  | -0.007 | 0.267  | -0.204 | 0.038  | -0.047 | 0.005  | 0.012  | 0.008  | 0.024  | 0.006  | <b>0.024</b>  |
| <b>B2PLYPD3(Full)</b>     | -0.004 | -0.013 | 0.040  | 0.038  | -0.086 | 0.169  | 0.018  | -0.017 | 0.143  | 0.009  | -0.026 | 0.265  | -0.207 | 0.030  | -0.066 | -0.016 | -0.006 | 0.001  | 0.012  | -0.010 | <b>0.014</b>  |
| <b>mPW2PLYP</b>           | -0.126 | -0.130 | -0.097 | -0.097 | -0.183 | -0.086 | -0.124 | -0.134 | -0.095 | -0.133 | -0.143 | -0.013 | -0.291 | -0.118 | -0.159 | -0.134 | -0.122 | -0.136 | -0.117 | -0.136 | <b>-0.129</b> |
| <b>mPW2PLYP(Full)</b>     | -0.134 | -0.138 | -0.102 | -0.103 | -0.186 | -0.089 | -0.129 | -0.143 | -0.099 | -0.139 | -0.152 | -0.016 | -0.292 | -0.122 | -0.170 | -0.154 | -0.127 | -0.143 | -0.124 | -0.153 | <b>-0.136</b> |
| <b>mPW2PLYPD</b>          | -0.221 | -0.224 | -0.202 | -0.202 | -0.264 | -0.191 | -0.215 | -0.222 | -0.198 | -0.224 | -0.230 | -0.140 | -0.345 | -0.214 | -0.244 | -0.227 | -0.219 | -0.233 | -0.218 | -0.232 | <b>-0.223</b> |
| <b>mPW2PLYPD(Full)</b>    | -0.226 | -0.229 | -0.204 | -0.206 | -0.265 | -0.193 | -0.220 | -0.227 | -0.201 | -0.229 | -0.236 | -0.142 | -0.347 | -0.218 | -0.251 | -0.241 | -0.222 | -0.239 | -0.223 | -0.242 | <b>-0.228</b> |
| <b>PBE0DH</b>             | 0.080  | 0.073  | 0.161  | 0.161  | -0.014 | 0.149  | 0.101  | 0.075  | 0.145  | 0.097  | 0.068  | 0.208  | -0.120 | 0.129  | 0.039  | 0.112  | 0.116  | 0.133  | 0.146  | 0.130  | <b>0.099</b>  |
| <b>PBE0DH(Full)</b>       | 0.075  | 0.069  | 0.156  | 0.155  | -0.016 | 0.148  | 0.096  | 0.066  | 0.142  | 0.092  | 0.062  | 0.207  | -0.121 | 0.125  | 0.031  | 0.093  | 0.113  | 0.126  | 0.139  | 0.115  | <b>0.094</b>  |
| <b>DSDPBEP86</b>          | 0.004  | -0.007 | 0.037  | 0.035  | -0.067 | 0.052  | -0.005 | -0.037 | 0.041  | -0.020 | -0.049 | 0.179  | -0.152 | 0.025  | -0.051 | -0.028 | -0.004 | -0.026 | 0.008  | -0.029 | <b>-0.005</b> |
| <b>DSDPBEP86(Full)</b>    | -0.008 | -0.018 | 0.029  | 0.025  | -0.070 | 0.050  | -0.019 | -0.053 | 0.030  | -0.031 | -0.065 | 0.163  | -0.155 | 0.017  | -0.064 | -0.072 | -0.012 | -0.041 | -0.007 | -0.056 | <b>-0.018</b> |
| <b>revDSDPBEP86</b>       | 0.026  | 0.017  | 0.075  | 0.078  | -0.049 | 0.067  | 0.012  | -0.019 | 0.058  | 0.002  | -0.029 | 0.193  | -0.142 | 0.048  | -0.033 | -0.013 | 0.019  | -0.006 | 0.034  | -0.004 | <b>0.017</b>  |
| <b>revDSDPBEP86(Full)</b> | 0.016  | 0.003  | 0.061  | 0.059  | -0.057 | 0.064  | 0.004  | -0.035 | 0.054  | -0.010 | -0.047 | 0.179  | -0.145 | 0.037  | -0.051 | -0.049 | 0.008  | -0.019 | 0.019  | -0.033 | <b>0.003</b>  |
| <b>PBEQIDH</b>            | 0.130  | 0.121  | 0.175  | 0.172  | 0.057  | 0.184  | 0.117  | 0.074  | 0.173  | 0.102  | 0.061  | 0.329  | -0.061 | 0.127  | 0.071  | 0.084  | 0.131  | 0.103  | 0.141  | 0.098  | <b>0.120</b>  |
| <b>PBEQIDH(Full)</b>      | 0.117  | 0.108  | 0.160  | 0.158  | 0.051  | 0.177  | 0.108  | 0.057  | 0.164  | 0.089  | 0.045  | 0.316  | -0.066 | 0.121  | 0.057  | 0.046  | 0.123  | 0.088  | 0.123  | 0.058  | <b>0.105</b>  |
| <b>MP2</b>                | 0.219  | 0.188  | 0.203  | 0.198  | 0.190  | 0.273  | 0.150  | 0.072  | 0.241  | 0.120  | 0.046  | 0.636  | 0.089  | 0.138  | 0.147  | 0.024  | 0.143  | 0.012  | 0.138  | 0.003  | <b>0.161</b>  |
| <b>MP2(Full)</b>          | 0.182  | 0.149  | 0.165  | 0.158  | 0.177  | 0.253  | 0.120  | 0.033  | 0.224  | 0.086  | 0.002  | 0.599  | 0.080  | 0.117  | 0.099  | -0.054 | 0.114  | -0.022 | 0.094  | -0.061 | <b>0.126</b>  |
| <b>MP3</b>                | 0.274  | 0.243  | 0.249  | 0.250  | 0.233  | 0.277  | 0.171  | 0.089  | 0.244  | 0.140  | 0.058  | 0.601  | 0.106  | 0.161  | 0.205  | 0.034  | 0.192  | 0.025  | 0.164  | 0.016  | <b>0.187</b>  |
| <b>MP3(Full)</b>          | 0.240  | 0.206  | 0.207  | 0.206  | 0.222  | 0.261  | 0.150  | 0.054  | 0.230  | 0.116  | 0.023  | 0.571  | 0.101  | 0.137  | 0.153  | -0.043 | 0.165  | 0.000  | 0.121  | -0.046 | <b>0.154</b>  |
| <b>CISD</b>               | 0.325  | 0.295  | 0.347  | 0.356  | 0.250  | 0.328  | 0.211  | 0.127  | 0.312  | 0.190  | 0.109  | 0.594  | 0.122  | 0.193  | 0.252  | 0.093  | 0.268  | 0.104  | 0.260  | 0.101  | <b>0.242</b>  |
| <b>CISD(Full)</b>         | 0.289  | 0.261  | 0.312  | 0.317  | 0.251  | 0.334  | 0.203  | 0.101  | 0.317  | 0.179  | 0.086  | 0.574  | 0.116  | 0.174  | 0.201  | 0.012  | 0.241  | 0.076  | 0.224  | 0.030  | <b>0.215</b>  |
| <b>CCSD</b>               | 0.282  | 0.253  | 0.272  | 0.270  | 0.229  | 0.292  | 0.179  | 0.096  | 0.271  | 0.151  | 0.073  | 0.599  | 0.116  | 0.163  | 0.216  | 0.049  | 0.209  | 0.047  | 0.190  | 0.033  | <b>0.200</b>  |
| <b>CCSD(Full)</b>         | 0.245  | 0.214  | 0.228  | 0.225  | 0.221  | 0.274  | 0.156  | 0.062  | 0.254  | 0.126  | 0.031  | 0.558  | 0.107  | 0.139  | 0.159  | -0.033 | 0.178  | 0.011  | 0.142  | -0.033 | <b>0.163</b>  |
| <b>QCISD</b>              | 0.280  | 0.251  | 0.272  | 0.270  | 0.228  | 0.293  | 0.180  | 0.096  | 0.266  | 0.151  | 0.074  | 0.601  | 0.114  | 0.160  | 0.214  | 0.047  | 0.206  | 0.045  | 0.189  | 0.032  | <b>0.198</b>  |
| <b>QCISD(Full)</b>        | 0.243  | 0.212  | 0.228  | 0.228  | 0.220  | 0.275  | 0.155  | 0.062  | 0.249  | 0.126  | 0.033  | 0.570  | 0.107  | 0.136  | 0.157  | -0.034 | 0.176  | 0.009  | 0.140  | -0.033 | <b>0.163</b>  |
| <b>BD</b>                 | 0.249  | 0.209  | 0.207  | 0.215  | 0.215  | 0.280  | 0.159  | 0.060  | 0.241  | 0.127  | 0.037  | 0.585  | 0.109  | 0.129  | 0.165  | -0.029 | 0.160  | 0.009  | 0.097  | -0.022 | <b>0.160</b>  |
| <b>BD(Full)</b>           | 0.249  | 0.209  | 0.207  | 0.212  | 0.215  | 0.280  | 0.159  | 0.059  | 0.241  | 0.127  | 0.037  | 0.585  | 0.109  | 0.129  | 0.165  | -0.029 | 0.160  | 0.009  | 0.097  | -0.022 | <b>0.160</b>  |
| <b>MP</b>                 |        |        |        |        |        |        |        |        |        |        |        |        |        |        |        |        |        |        |        |        |               |



|                       |              |              |              |              |              |              |              |              |              |              |              |              |               |              |              |              |              |              |              |              |              |
|-----------------------|--------------|--------------|--------------|--------------|--------------|--------------|--------------|--------------|--------------|--------------|--------------|--------------|---------------|--------------|--------------|--------------|--------------|--------------|--------------|--------------|--------------|
| <b>QCISD(T)</b>       | 0.249        | 0.215        | 0.198        | 0.172        | 0.207        | 0.260        | 0.143        | 0.069        | 0.224        | 0.110        | 0.036        | 0.565        | 0.103         | 0.115        | 0.174        | 0.004        | 0.133        | -0.002       | 0.105        | -0.013       | <b>0.153</b> |
| <b>QCISD(T)(Full)</b> | 0.199        | 0.166        | 0.163        | 0.168        | 0.186        | 0.235        | 0.090        | 0.037        | 0.189        | 0.051        | -0.021       | 0.530        | 0.097         | 0.098        | 0.107        | -0.053       | 0.115        | -0.023       | 0.084        | -0.049       | <b>0.118</b> |
| <b>BD(T)</b>          | 0.207        | 0.186        | 0.187        | 0.150        | 0.160        | 0.224        | 0.114        | 0.033        | 0.187        | 0.058        | 0.021        | 0.508        | 0.100         | 0.063        | 0.127        | 0.007        | 0.077        | -0.006       | 0.098        | -0.013       | <b>0.124</b> |
| <b>BD(T)(Full)</b>    | 0.180        | 0.111        | 0.182        | 0.178        | 0.209        | 0.235        | 0.119        | 0.046        | 0.271        | 0.090        | 0.003        | 0.556        | 0.085         | 0.041        | 0.057        | -0.029       | 0.091        | -0.009       | 0.074        | -0.024       | <b>0.123</b> |
| <b>MP5</b>            | 0.257        | 0.224        | 0.192        | 0.199        | 0.210        | 0.257        | 0.142        | 0.069        | 0.222        | 0.111        | 0.033        | 0.569        | 0.105         | 0.120        | 0.180        | 0.007        | 0.141        | 0.015        |              |              | <b>0.170</b> |
| <b>MP5(Full)</b>      | 0.213        | 0.177        | 0.180        | 0.176        | 0.177        | 0.231        | -0.241       | 0.023        | 0.193        | 0.052        | -0.021       | 0.498        | 0.098         | 0.101        | 0.118        | -0.050       | 0.138        | -0.025       |              |              | <b>0.113</b> |
| <b>Ave</b>            | <b>0.192</b> | <b>0.185</b> | <b>0.401</b> | <b>0.401</b> | <b>0.078</b> | <b>0.351</b> | <b>0.302</b> | <b>0.271</b> | <b>0.347</b> | <b>0.299</b> | <b>0.268</b> | <b>0.373</b> | <b>-0.056</b> | <b>0.333</b> | <b>0.149</b> | <b>0.343</b> | <b>0.277</b> | <b>0.392</b> | <b>0.391</b> | <b>0.415</b> | <b>0.286</b> |
| <b>PM7</b>            | 0.228        |              |              |              |              |              |              |              |              |              |              |              |               |              |              |              |              |              |              |              |              |
| <b>PM6</b>            | 0.270        |              |              |              |              |              |              |              |              |              |              |              |               |              |              |              |              |              |              |              |              |
| <b>Dreiding</b>       | 0.000        |              |              |              |              |              |              |              |              |              |              |              |               |              |              |              |              |              |              |              |              |
| <b>UFF</b>            | 0.094        |              |              |              |              |              |              |              |              |              |              |              |               |              |              |              |              |              |              |              |              |

---

Table S4. Imaginary frequencies (cm<sup>-1</sup>) of 36 methods and 20 basis sets.

| Molecules                                      | Method/basis set and imaginary frequency                                                                                                                                                                                                                                                                                                                                                                                                                                                                                                                                                                                                                                                                                                                                                                                                                                                                                                                                                                                                                                                                                                                                                                                                                                                                                                                                                                                                                                                                                                                                                                                                                                                                                                                                                                                                                                                                     |
|------------------------------------------------|--------------------------------------------------------------------------------------------------------------------------------------------------------------------------------------------------------------------------------------------------------------------------------------------------------------------------------------------------------------------------------------------------------------------------------------------------------------------------------------------------------------------------------------------------------------------------------------------------------------------------------------------------------------------------------------------------------------------------------------------------------------------------------------------------------------------------------------------------------------------------------------------------------------------------------------------------------------------------------------------------------------------------------------------------------------------------------------------------------------------------------------------------------------------------------------------------------------------------------------------------------------------------------------------------------------------------------------------------------------------------------------------------------------------------------------------------------------------------------------------------------------------------------------------------------------------------------------------------------------------------------------------------------------------------------------------------------------------------------------------------------------------------------------------------------------------------------------------------------------------------------------------------------------|
| <sup>4</sup> He <sub>2</sub> (62) <sup>a</sup> | B3LYP/6-311++G(2d,2p) (4.23 <i>i</i> , SGG);<br>B3LYP/6-311++G(2df,2pd) (7.30 <i>i</i> , SGG);<br>B3LYP/6-311++G(3d2f,3p2d) (2.32 <i>i</i> , SGG);<br>B3LYP/6-311++G(df,pd) (6.80 <i>i</i> , SGG);<br>B3LYP/6-311++G** (2.32 <i>i</i> , SGG);<br>B3LYP/aug-cc-pVDZ (8.80 <i>i</i> , SGG);<br>B3LYP/cc-pVDZ (28.21 <i>i</i> , SGG);<br>B3LYP/cc-pVTZ (11.45 <i>i</i> , SGG);<br>B3LYP-D2/6-311++G(2d,2p) (4.78 <i>i</i> , SGG);<br>B3LYP-D2/6-311++G(2df,2pd) (5.53 <i>i</i> , SGG);<br>B3LYP-D2/6-311++G(3d2f,3p2d) (16.90 <i>i</i> , SGG);<br>B3LYP-D2/6-311++G(3d,3p) (13.10 <i>i</i> , SGG);<br>B3LYP-D2/6-311++G(3df,3pd) (13.40 <i>i</i> , SGG);<br>B3LYP-D2/6-311++G(df,pd) (17.12 <i>i</i> , SGG);<br>B3LYP-D2/6-311++G** (16.90 <i>i</i> , SGG);<br>B3LYP-D2/aug-cc-pV5Z (14.93 <i>i</i> , SGG);<br>B3LYP-D2/aug-cc-pVDZ (1.93 <i>i</i> , SGG);<br>B3LYP-D2/aug-cc-pVQZ (17.73 <i>i</i> , SGG);<br>B3LYP-D2/aug-cc-pVTZ (17.07 <i>i</i> , SGG);<br>B3LYP-D2/cc-pV5Z (14.90 <i>i</i> , SGG);<br>B3LYP-D2/cc-pVQZ (17.97 <i>i</i> , SGG);<br>B3LYP-D2/Def2QZVP (14.64 <i>i</i> , SGG);<br>B3LYP-D2/Def2QZVPP (14.64 <i>i</i> , SGG);<br>B3LYP-D3/6-311++G(3d,3p) (15.58 <i>i</i> , SGG);<br>B3LYP-D3/6-311++G(3df,3pd) (15.83 <i>i</i> , SGG);<br>B3LYP-D3/aug-cc-pVDZ (8.65 <i>i</i> , SGG);<br>B3LYP-D3BJ/6-311++G(2d,2p) (16.85 <i>i</i> , SGG);<br>B3LYP-D3BJ/6-311++G(3df,3pd) (11.09 <i>i</i> , SGG);<br>B3LYP-D3BJ/aug-cc-pVQZ (15.71 <i>i</i> , SGG);<br>B3LYP-D3BJ/cc-pV5Z (19.68 <i>i</i> , SGG);<br>B3LYP-D3BJ/Def2QZVP (20.73 <i>i</i> , SGG);<br>B3LYP-D3BJ/Def2QZVPP (20.73 <i>i</i> , SGG);<br>BD(T)/6-311++G(3d2f,3p2d) (20.25 <i>i</i> , SGG);<br>BD(T)/6-311++G(3d,3p) (40.83 <i>i</i> , SGG);<br>BD(T)/6-311++G(3df,3pd) (27.07 <i>i</i> , SGG);<br>BD(T)/6-311++G** (20.25 <i>i</i> , SGG);<br>BD(T)/aug-cc-pVDZ (23.51 <i>i</i> , SGG);<br>BD(T)/Def2TZVP (23.72 <i>i</i> , SGG); |

|                      |                                                                                                                                                                                                                                                                                                                                                                                                                                                                                                                                                                                                                                                                                                                                                                                                                                                                                                                                                                                                                                                                                                                                                                                                                   |
|----------------------|-------------------------------------------------------------------------------------------------------------------------------------------------------------------------------------------------------------------------------------------------------------------------------------------------------------------------------------------------------------------------------------------------------------------------------------------------------------------------------------------------------------------------------------------------------------------------------------------------------------------------------------------------------------------------------------------------------------------------------------------------------------------------------------------------------------------------------------------------------------------------------------------------------------------------------------------------------------------------------------------------------------------------------------------------------------------------------------------------------------------------------------------------------------------------------------------------------------------|
|                      | BD(T)(Full)/6-311++G(3d2f,3p2d) (20.25 <i>i</i> , SGG);<br>BD(T)(Full)/6-311++G(3d,3p) (40.83 <i>i</i> , SGG);<br>BD(T)(Full)/6-311++G(3df,3pd) (27.07 <i>i</i> , SGG);<br>BD(T)(Full)/6-311++G** (20.25 <i>i</i> , SGG);<br>BD(T)(Full)/aug-cc-pVDZ (23.51 <i>i</i> , SGG);<br>BD(T)(Full)/Def2TZVP (23.73 <i>i</i> , SGG);<br>HF/aug-cc-pVDZ (1.27 <i>i</i> , SGG);<br>HF/Def2TZVP (1.10 <i>i</i> , SGG);<br>M06-D3/cc-pVDZ (91.51 <i>i</i> , SGG);<br>PBEB95/6-311++G(2d,2p) (112.50 <i>i</i> , SGG);<br>PBEB95/6-311++G(2df,2pd) (112.54 <i>i</i> , SGG);<br>PBEB95/6-311++G(3d2f,3p2d) (115.49 <i>i</i> , SGG);<br>PBEB95/6-311++G(3d,3p) (112.85 <i>i</i> , SGG);<br>PBEB95/6-311++G(3df,3pd) (112.89 <i>i</i> , SGG);<br>PBEB95/6-311++G(df,pd) (115.53 <i>i</i> , SGG);<br>PBEB95/6-311++G** (115.49 <i>i</i> , SGG);<br>PBEB95/aug-cc-pVDZ (116.96 <i>i</i> , SGG);<br>PW6B95D3/aug-cc-pV5Z (104.00 <i>i</i> , SGG);<br>PW6B95D3/aug-cc-pVQZ (104.42 <i>i</i> , SGG);<br>PW6B95D3/cc-pV5Z (103.49 <i>i</i> , SGG);<br>PW6B95D3/cc-pVQZ (103.49 <i>i</i> , SGG);<br>PW6B95D3/cc-pVTZ (104.37 <i>i</i> , SGG);<br>PW6B95D3/Def2QZVP (103.58 <i>i</i> , SGG);<br>PW6B95D3/Def2QZVPP (103.58 <i>i</i> , SGG) |
| Ne <sub>2</sub> (27) | B3LYP/aug-cc-pV5Z (8.21 <i>i</i> , SGG);<br>B3LYP/Def2QZVPP (1.05 <i>i</i> , SGG);<br>BD(T)/aug-cc-pVQZ (7.62 <i>i</i> , SGG);<br>BD(T)/cc-pV5Z (14.71 <i>i</i> , SGG);<br>BD(T)/cc-pVDZ (14.57 <i>i</i> , SGG);<br>BD(T)/Def2QZVP (16.30 <i>i</i> , SGG);<br>BD(T)/Def2QZVPP (16.30 <i>i</i> , SGG);<br>BD(T)(Full)/cc-pV5Z (13.70 <i>i</i> , SGG);<br>BD(T)(Full)/Def2QZVP (14.58 <i>i</i> , SGG);<br>BD(T)(Full)/Def2QZVPP (14.58 <i>i</i> , SGG);<br>LC-PBEB95/Def2TZVP (58.41 <i>i</i> , SGG);<br>LC-PBEB95/Def2TZVPP (58.41 <i>i</i> , SGG);<br>M06/6-311G** (65.44 <i>i</i> , SGG);<br>MN15/cc-pVQZ (40.52 <i>i</i> , SGG);<br>PBEB95/6-311++G(3d2f,3p2d) (39.52 <i>i</i> , SGG);<br>PBEB95/aug-cc-pV5Z (49.62 <i>i</i> , SGG);<br>PBEB95/aug-cc-pVDZ (29.33 <i>i</i> , SGG);                                                                                                                                                                                                                                                                                                                                                                                                                              |

|                                   |                                                                                                                                                                                                                                                                                                                                                                                                                                                                                                                                                                                                                                                                                                                                                                                                                                                                            |
|-----------------------------------|----------------------------------------------------------------------------------------------------------------------------------------------------------------------------------------------------------------------------------------------------------------------------------------------------------------------------------------------------------------------------------------------------------------------------------------------------------------------------------------------------------------------------------------------------------------------------------------------------------------------------------------------------------------------------------------------------------------------------------------------------------------------------------------------------------------------------------------------------------------------------|
|                                   | PBEB95/aug-cc-pVQZ (61.42 <i>i</i> , SGG);<br>PBEB95/cc-pVTZ (59.38 <i>i</i> , SGG);<br>PW6B95D3/6-311++G(3d,3p) (31.77 <i>i</i> , SGG);<br>PW6B95D3/6-311++G(3df,3pd) (31.79 <i>i</i> , SGG);<br>PW6B95D3/cc-pVQZ (47.10 <i>i</i> , SGG);<br>PW6B95D3/Def2TZVP (48.57 <i>i</i> , SGG);<br>PW6B95D3/Def2TZVPP (48.57 <i>i</i> , SGG);<br>wB97X/6-311G** (15.09 <i>i</i> , SGG);<br>wB97X/Def2QZVP (51.78 <i>i</i> , SGG);<br>wB97X/Def2QZVPP (51.78 <i>i</i> , SGG)                                                                                                                                                                                                                                                                                                                                                                                                        |
| <sup>40</sup> Ar <sub>2</sub> (7) | B3LYP/6-311++G(2d,2p) (4.95 <i>i</i> , SGG);<br>B3LYP/6-311++G(2df,2pd) (5.37 <i>i</i> , SGG);<br>B3LYP/cc-pVDZ (5.85 <i>i</i> , SGG);<br>BD(T)/6-311++G(3d2f,3p2d) (3.77 <i>i</i> , SGG);<br>BD(T)/6-311G** (4.65 <i>i</i> , SGG);<br>BD(T)/aug-cc-pVTZ (70.07 <i>i</i> , SGG);<br>BD(T)(Full)/6-311++G(3d2f,3p2d) (11.44 <i>i</i> , SGG)                                                                                                                                                                                                                                                                                                                                                                                                                                                                                                                                 |
| <sup>84</sup> Kr <sub>2</sub> (2) | B3LYP/6-311G** (3.06 <i>i</i> , SGG);<br>B3LYP/cc-pVTZ (3.66 <i>i</i> , SGG)                                                                                                                                                                                                                                                                                                                                                                                                                                                                                                                                                                                                                                                                                                                                                                                               |
| HeNe (19)                         | B3LYP/cc-pV5Z (11.86 <i>i</i> , SG);<br>BD(T)/aug-cc-pV5Z (19.09 <i>i</i> , SG);<br>BD(T)/aug-cc-pVQZ (15.45 <i>i</i> , SG);<br>BD(T)/cc-pV5Z (25.41 <i>i</i> , SG);<br>BD(T)/Def2QZVP (28.70 <i>i</i> , SG);<br>BD(T)/Def2QZVPP (28.70 <i>i</i> , SG);<br>BD(T)(Full)/aug-cc-pV5Z (11.09 <i>i</i> , SG);<br>BD(T)(Full)/aug-cc-pVQZ (12.91 <i>i</i> , SG);<br>BD(T)(Full)/cc-pV5Z (24.56 <i>i</i> , SG);<br>BD(T)(Full)/Def2QZVP (27.44 <i>i</i> , SG);<br>BD(T)(Full)/Def2QZVPP (27.44 <i>i</i> , SG);<br>HF/aug-cc-pVTZ (1.77 <i>i</i> , SG);<br>LC-PBEB95/cc-pVDZ (69.86 <i>i</i> , SG);<br>LC-wPBE-D3/aug-cc-pVDZ (1.93 <i>i</i> , SG);<br>M06-D3/aug-cc-pV5Z (21.82 <i>i</i> , SG);<br>wB97X/6-311++G(2d,2p) (49.31 <i>i</i> , SG);<br>wB97X/6-311++G(2df,2pd) (57.38 <i>i</i> , SG);<br>wB97X/cc-pVDZ (43.15 <i>i</i> , SG);<br>wB97X/cc-pVQZ (47.94 <i>i</i> , SG) |
| HeAr (10)                         | B3LYP/6-311G** (12.66 <i>i</i> , SG);<br>B3LYP/Def2TZVP (21.29 <i>i</i> , SG);<br>BD(T)/6-311++G(3df,3pd) (41.91 <i>i</i> , SG);                                                                                                                                                                                                                                                                                                                                                                                                                                                                                                                                                                                                                                                                                                                                           |

|                                        |                                                                                                                                                                                                                                                                                                                                                                                                                                                                                                                                                                                                                                                                                         |
|----------------------------------------|-----------------------------------------------------------------------------------------------------------------------------------------------------------------------------------------------------------------------------------------------------------------------------------------------------------------------------------------------------------------------------------------------------------------------------------------------------------------------------------------------------------------------------------------------------------------------------------------------------------------------------------------------------------------------------------------|
|                                        | BD(T)/aug-cc-pVTZ (41.41 <i>i</i> , SG);<br>BD(T)(Full)/6-311++G(2d,2p) (4.99 <i>i</i> , SG);<br>BD(T)(Full)/6-311++G(2df,2pd) (37.65 <i>i</i> , SG);<br>BD(T)(Full)/6-311++G(3d2f,3p2d) (36.94 <i>i</i> , SG);<br>BD(T)(Full)/6-311++G(3d,3p) (48.84 <i>i</i> , SG);<br>M06/aug-cc-pVQZ (21.96 <i>i</i> , SG);<br>M06-D3/aug-cc-pVQZ (5.61 <i>i</i> , SG)                                                                                                                                                                                                                                                                                                                              |
| HeKr (14)                              | B3LYP-D2/6-311++G(df,pd) (6.97 <i>i</i> , SG);<br>B3LYP-D2/6-311++G** (6.23 <i>i</i> , SG);<br>BD(T)/6-311++G(2df,2pd) (35.13 <i>i</i> , SG);<br>BD(T)(Full)/6-311G** (19.67 <i>i</i> , SG);<br>BD(T)(Full)/aug-cc-pV5Z (8.45 <i>i</i> , SG);<br>MN15L/6-311++G(3df,3pd) (89.83 <i>i</i> , SG);<br>MN15L/Def2TZVPP (106.44 <i>i</i> , SG);<br>PBEB95/6-311++G(2d,2p) (72.67 <i>i</i> , SG);<br>PBEB95/6-311++G(2df,2pd) (72.75 <i>i</i> , SG);<br>PBEB95/6-311++G(3d,3p) (72.89 <i>i</i> , SG);<br>PBEB95/6-311++G(3df,3pd) (72.96 <i>i</i> , SG);<br>PBEB95/aug-cc-pVDZ (78.07 <i>i</i> , SG);<br>PW6B95D3/Def2TZVP (66.25 <i>i</i> , SG);<br>PW6B95D3/Def2TZVPP (66.18 <i>i</i> , SG) |
| <sup>20</sup> Ne <sup>40</sup> Ar (10) | LC-PBEB95/Def2TZVP (61.94 <i>i</i> , SG);<br>LC-PBEB95/Def2TZVPP (61.93 <i>i</i> , SG);<br>MN15L/aug-cc-pVTZ (25.88 <i>i</i> , SG);<br>MN15L/Def2TZVP (59.52 <i>i</i> , SG);<br>MN15L/Def2TZVPP (59.51 <i>i</i> , SG);<br>PBEB95/6-311++G(3d2f,3p2d) (68.56 <i>i</i> , SG);<br>PBEB95/6-311++G(df,pd) (68.93 <i>i</i> , SG);<br>PBEB95/6-311++G** (68.86 <i>i</i> , SG);<br>PBEB95/aug-cc-pVDZ (61.14 <i>i</i> , SG);<br>PBEB95/aug-cc-pVTZ (59.09 <i>i</i> , SG)                                                                                                                                                                                                                       |
| <sup>22</sup> Ne <sup>36</sup> Ar (10) | B3LYP/aug-cc-pV5Z (6.73 <i>i</i> , SG);<br>LC-PBEB95/Def2TZVP (60.30 <i>i</i> , SG);<br>LC-PBEB95/Def2TZVPP (60.29 <i>i</i> , SG);<br>LC-wPBE-D3/aug-cc-pVQZ (6.61 <i>i</i> , SG);<br>MN15L/aug-cc-pVTZ (23.67 <i>i</i> , SG);<br>PBEB95/6-311++G(3d2f,3p2d) (67.46 <i>i</i> , SG);<br>PBEB95/6-311++G(df,pd) (67.83 <i>i</i> , SG);<br>PBEB95/6-311++G** (67.76 <i>i</i> , SG);<br>PBEB95/aug-cc-pVDZ (58.92 <i>i</i> , SG);<br>PBEB95/aug-cc-pVTZ (58.33 <i>i</i> , SG)                                                                                                                                                                                                               |

|                                       |                                                                                                                                                                                      |
|---------------------------------------|--------------------------------------------------------------------------------------------------------------------------------------------------------------------------------------|
| <sup>20</sup> Ne <sup>84</sup> Kr (1) | B3LYP/cc-pV5Z (3.68 <i>i</i> , SG)                                                                                                                                                   |
| <sup>40</sup> Ar <sup>84</sup> Kr (4) | B3LYP/Def2TZVP (1.52 <i>i</i> , SG);<br>B3LYP/Def2TZVPP (1.42 <i>i</i> , SG);<br>BD(T)/6-311++G(df,pd) (7.57 <i>i</i> , SG);<br>BD(T)(Full)/6-311++G(3d2f,3p2d) (4.86 <i>i</i> , SG) |

<sup>a</sup> The number in the bracket is the total number of method/basis sets with imaginary frequencies when calculating this molecule.

Table S5. MADs (Å) of 11-RG-Mols calculated by 54 methods and 60 basis sets.<sup>a,b,c,d</sup>

|                    | BS21  | BS22  | BS23  | BS24  | BS25  | BS26  | BS27  | BS28  | BS29  | BS30  | BS31  | BS32  | BS33  | BS34  | BS35  | BS36  | BS37  | BS38  | BS39  | BS40  |       |
|--------------------|-------|-------|-------|-------|-------|-------|-------|-------|-------|-------|-------|-------|-------|-------|-------|-------|-------|-------|-------|-------|-------|
|                    | BS41  | BS42  | BS43  | BS44  | BS45  | BS46  | BS47  | BS48  | BS49  | BS50  | BS51  | BS52  | BS53  | BS54  | BS55  | BS56  | BS57  | BS58  | BS59  | BS60  |       |
|                    | BS61  | BS62  | BS63  | BS64  | BS65  | BS66  | BS67  | BS68  | BS69  | BS70  | BS71  | BS72  | BS73  | BS74  | BS75  | BS76  | BS77  | BS78  | BS79  | BS80  | Ave   |
| MP2                | 0.178 | 0.153 | 0.715 | 0.366 | 0.153 | 0.153 | 0.153 | 0.715 | 1.064 | 0.469 | 1.192 | 0.971 | 0.675 | 0.641 | 0.310 | 0.134 | 0.981 |       |       |       |       |
|                    | 0.200 | 0.259 | 0.226 | 0.270 | 0.585 | 0.381 | 0.623 | 0.501 | 0.718 | 0.258 | 0.242 | 0.170 | 0.295 | 0.130 | 0.237 | 0.334 | 0.379 | 0.253 | 0.269 | 0.162 |       |
|                    | 0.285 | 0.124 | 0.224 | 0.349 | 0.153 | 0.140 | 0.219 | 0.147 | 0.140 | 0.468 | 0.251 | 0.294 | 0.174 | 0.071 | 0.283 | 0.154 | 0.073 | 0.099 | 0.893 | 0.096 | 0.354 |
| MP2(Full)          | 0.175 | 0.153 | 0.636 | 0.319 | 0.153 | 0.153 | 0.153 | 0.647 | 0.831 | 0.430 | 1.192 | 0.971 | 0.675 | 0.641 | 0.307 | 0.134 | 0.981 |       |       |       |       |
|                    | 0.188 | 0.230 | 0.228 | 0.267 | 0.565 | 0.369 | 0.599 | 0.490 | 0.692 | 0.266 | 0.247 | 0.161 | 0.279 | 0.122 | 0.226 | 0.320 | 0.364 | 0.237 | 0.275 | 0.159 |       |
|                    | 0.274 | 0.122 | 0.207 | 0.339 | 0.149 | 0.159 | 0.211 | 0.138 | 0.207 | 0.159 | 0.254 | 0.285 | 0.150 | 0.074 | 0.221 | 0.133 | 0.088 | 0.147 | 0.892 | 0.092 | 0.336 |
| DSDPBEP86          | 0.207 | 0.295 | 0.150 | 0.054 | 0.295 | 0.295 | 0.295 | 0.149 | 0.269 | 0.043 | 0.760 | 0.669 | 0.135 | 0.198 | 0.232 | 0.040 | 0.753 |       |       |       |       |
|                    | 0.140 | 0.045 | 0.420 | 0.215 | 0.180 | 0.177 | 0.152 | 0.254 | 0.231 | 0.267 | 0.298 | 0.081 | 0.177 | 0.099 | 0.129 | 0.054 | 0.121 | 0.038 | 0.273 | 0.083 |       |
|                    | 0.173 | 0.100 | 0.037 | 0.118 | 0.053 | 0.114 | 0.124 | 0.047 | 0.162 | 0.222 | 0.337 | 0.122 | 0.082 | 0.063 | 0.121 | 0.089 | 0.075 | 0.101 | 0.271 | 0.001 | 0.187 |
| DSDPBEP86(Full)    | 0.208 | 0.299 | 0.135 | 0.044 | 0.299 | 0.299 | 0.299 | 0.139 | 0.256 | 0.035 | 0.760 | 0.669 | 0.135 | 0.198 | 0.233 | 0.040 | 0.754 |       |       |       |       |
|                    | 0.137 | 0.037 | 0.423 | 0.217 | 0.179 | 0.175 | 0.146 | 0.253 | 0.226 | 0.270 | 0.301 | 0.085 | 0.172 | 0.103 | 0.132 | 0.050 | 0.118 | 0.035 | 0.276 | 0.092 |       |
|                    | 0.179 | 0.110 | 0.032 | 0.111 | 0.052 | 0.151 | 0.130 | 0.066 | 0.190 | 0.217 | 0.339 | 0.121 | 0.079 | 0.075 | 0.121 | 0.087 | 0.090 | 0.134 | 0.272 | 0.001 | 0.189 |
| revDSDPBEP86       | 0.205 | 0.287 | 0.161 | 0.072 | 0.287 | 0.287 | 0.287 | 0.161 | 0.285 | 0.050 | 0.769 | 0.678 | 0.142 | 0.210 | 0.232 | 0.058 | 0.757 |       |       |       |       |
|                    | 0.144 | 0.060 | 0.415 | 0.212 | 0.186 | 0.183 | 0.159 | 0.262 | 0.242 | 0.264 | 0.293 | 0.084 | 0.183 | 0.100 | 0.136 | 0.064 | 0.132 | 0.046 | 0.270 | 0.084 |       |
|                    | 0.179 | 0.101 | 0.041 | 0.126 | 0.059 | 0.121 | 0.128 | 0.053 | 0.132 | 0.231 | 0.332 | 0.134 | 0.076 | 0.061 | 0.128 | 0.087 | 0.067 | 0.084 | 0.271 | 0.014 | 0.191 |
| revDSDPBEP86(Full) | 0.205 | 0.290 | 0.146 | 0.054 | 0.290 | 0.290 | 0.290 | 0.150 | 0.271 | 0.045 | 0.769 | 0.678 | 0.142 | 0.209 | 0.233 | 0.058 | 0.757 |       |       |       |       |
|                    | 0.142 | 0.056 | 0.418 | 0.214 | 0.184 | 0.181 | 0.156 | 0.259 | 0.236 | 0.267 | 0.296 | 0.086 | 0.180 | 0.102 | 0.135 | 0.061 | 0.129 | 0.043 | 0.273 | 0.088 |       |
|                    | 0.178 | 0.105 | 0.037 | 0.122 | 0.062 | 0.137 | 0.130 | 0.058 | 0.175 | 0.227 | 0.334 | 0.132 | 0.071 | 0.066 | 0.128 | 0.084 | 0.076 | 0.105 | 0.271 | 0.014 | 0.191 |
| B2PLYPD            | 0.307 | 0.373 | 0.127 | 0.103 | 0.373 | 0.373 | 0.373 | 0.126 | 0.147 | 0.108 | 0.754 | 0.647 | 0.164 | 0.285 | 0.317 | 0.147 | 0.790 |       |       |       |       |
|                    | 0.210 | 0.096 | 0.524 | 0.311 | 0.229 | 0.178 | 0.127 | 0.220 | 0.289 | 0.343 | 0.365 | 0.192 | 0.279 | 0.206 | 0.191 | 0.092 | 0.259 | 0.128 | 0.347 | 0.193 |       |
|                    | 0.277 | 0.197 | 0.128 | 0.264 | 0.138 | 0.161 | 0.192 | 0.139 | 0.177 | 0.162 | 0.390 | 0.164 | 0.105 | 0.119 | 0.161 | 0.134 | 0.133 | 0.155 | 0.352 | 0.134 | 0.245 |
| B2PLYPD(Full)      | 0.307 | 0.376 | 0.118 | 0.103 | 0.376 | 0.376 | 0.376 | 0.120 | 0.143 | 0.101 | 0.754 | 0.647 | 0.164 | 0.285 | 0.317 | 0.147 | 0.790 |       |       |       |       |
|                    | 0.209 | 0.094 | 0.525 | 0.312 | 0.228 | 0.178 | 0.127 | 0.221 | 0.296 | 0.344 | 0.366 | 0.194 | 0.277 | 0.207 | 0.193 | 0.093 | 0.262 | 0.129 | 0.348 | 0.195 |       |
|                    | 0.277 | 0.200 | 0.129 | 0.256 | 0.142 | 0.169 | 0.203 | 0.140 | 0.196 | 0.166 | 0.391 | 0.163 | 0.112 | 0.130 | 0.161 | 0.143 | 0.143 | 0.170 | 0.353 | 0.132 | 0.247 |
| B2PLYPD-D3         | 0.301 | 0.378 | 0.155 | 0.080 | 0.378 | 0.378 | 0.378 | 0.153 | 0.216 | 0.138 | 0.732 | 0.665 | 0.168 | 0.332 | 0.299 | 0.110 | 0.774 |       |       |       |       |
|                    | 0.189 | 0.094 | 0.534 | 0.300 | 0.247 | 0.202 | 0.147 | 0.287 | 0.347 | 0.335 | 0.363 | 0.161 | 0.262 | 0.176 | 0.237 | 0.089 | 0.242 | 0.083 | 0.340 | 0.163 |       |
|                    | 0.262 | 0.167 | 0.083 | 0.230 | 0.154 | 0.180 | 0.188 | 0.155 | 0.175 | 0.233 | 0.391 | 0.170 | 0.136 | 0.083 | 0.155 | 0.118 | 0.095 | 0.132 | 0.059 | 0.035 | 0.239 |
| B2PLYPD-D3(Full)   | 0.302 | 0.380 | 0.142 | 0.081 | 0.380 | 0.379 | 0.380 | 0.145 | 0.209 | 0.138 | 0.732 | 0.665 | 0.168 | 0.332 | 0.300 | 0.110 | 0.774 |       |       |       |       |
|                    | 0.187 | 0.096 | 0.535 | 0.301 | 0.251 | 0.201 | 0.145 | 0.257 | 0.305 | 0.337 | 0.364 | 0.163 | 0.263 | 0.179 | 0.228 | 0.092 | 0.234 | 0.084 | 0.342 | 0.166 |       |
|                    | 0.264 | 0.170 | 0.083 | 0.236 | 0.157 | 0.180 | 0.188 | 0.163 | 0.197 | 0.196 | 0.392 | 0.169 | 0.148 | 0.091 | 0.155 | 0.126 | 0.118 | 0.152 | 0.060 | 0.036 | 0.239 |
| B2PLYPD3           | 0.271 | 0.345 | 0.169 | 0.086 | 0.345 | 0.345 | 0.345 | 0.168 | 0.339 | 0.126 | 0.761 | 0.696 | 0.153 | 0.368 | 0.276 | 0.083 | 0.769 |       |       |       |       |
|                    | 0.177 | 0.176 | 0.518 | 0.271 | 0.242 | 0.194 | 0.139 | 0.270 | 0.335 | 0.313 | 0.342 | 0.134 | 0.253 | 0.152 | 0.222 | 0.064 | 0.226 | 0.061 | 0.318 | 0.135 |       |
|                    | 0.250 | 0.144 | 0.056 | 0.258 | 0.147 | 0.162 | 0.226 | 0.092 | 0.154 | 0.261 | 0.374 | 0.195 | 0.092 | 0.054 | 0.191 | 0.063 | 0.054 | 0.092 | 0.397 | 0.000 | 0.236 |
| B2PLYPD3(Full)     | 0.271 | 0.347 | 0.160 | 0.077 | 0.347 | 0.347 | 0.347 | 0.161 | 0.332 | 0.118 | 0.761 | 0.696 | 0.153 | 0.368 | 0.277 | 0.083 | 0.769 |       |       |       |       |
|                    | 0.175 | 0.151 | 0.519 | 0.272 | 0.242 | 0.193 | 0.136 | 0.266 | 0.331 | 0.314 | 0.344 | 0.136 | 0.256 | 0.155 | 0.225 | 0.062 | 0.224 | 0.058 | 0.320 | 0.139 |       |
|                    | 0.244 | 0.148 | 0.056 | 0.223 | 0.157 | 0.158 | 0.228 | 0.105 | 0.164 | 0.259 | 0.375 | 0.195 | 0.103 | 0.061 | 0.191 | 0.073 | 0.063 | 0.107 | 0.396 | 0.000 | 0.236 |
| MP3                | 0.174 | 0.143 | 0.728 | 0.409 | 0.143 | 0.143 | 0.143 | 0.729 | 1.049 | 0.487 | 1.196 | 0.954 | 0.687 | 0.627 | 0.325 | 0.167 | 0.985 |       |       |       |       |
|                    | 0.223 | 0.284 | 0.219 | 0.258 | 0.588 | 0.368 | 0.597 | 0.492 | 0.699 | 0.249 | 0.233 | 0.159 | 0.288 | 0.122 | 0.224 | 0.337 | 0.379 | 0.257 | 0.257 | 0.150 |       |
|                    | 0.277 | 0.116 | 0.226 | 0.353 | 0.174 | 0.164 | 0.205 | 0.157 | 0.156 | 0.451 | 0.239 | 0.283 | 0.180 | 0.077 | 0.269 | 0.161 | 0.065 | 0.065 | 0.916 | 0.792 | 0.365 |
| MP3(Full)          | 0.172 | 0.143 | 0.655 | 0.360 | 0.143 | 0.143 | 0.143 | 0.667 | 0.837 | 0.463 | 1.196 | 0.954 | 0.687 | 0.627 | 0.323 | 0.167 | 0.985 |       |       |       |       |
|                    | 0.211 | 0.259 | 0.220 | 0.254 | 0.572 | 0.358 | 0.575 | 0.482 | 0.676 | 0.253 | 0.235 | 0.151 | 0.272 | 0.115 | 0.211 | 0.324 | 0.366 | 0.242 | 0.262 | 0.158 |       |
|                    | 0.277 | 0.124 | 0.211 | 0.344 | 0.162 | 0.187 | 0.208 | 0.148 | 0.183 | 0.438 | 0.242 | 0.274 | 0.159 | 0.071 | 0.201 | 0.143 | 0.063 | 0.095 | 0.902 | 0.087 | 0.340 |
| CCSD               | 0.166 | 0.142 | 0.710 | 0.409 | 0.142 | 0.142 | 0.142 | 0.710 | 1.030 | 0.476 | 1.184 | 0.947 | 0.667 | 0.622 | 0.313 | 0.163 | 0.984 |       |       |       |       |
|                    | 0.230 | 0.292 | 0.220 | 0.252 | 0.581 | 0.354 | 0.594 | 0.492 | 0.699 | 0.244 | 0.236 | 0.155 | 0.298 | 0.130 | 0.237 | 0.342 | 0.400 | 0.269 | 0.251 | 0.141 |       |
|                    | 0.282 | 0.118 | 0.243 | 0.380 | 0.180 | 0.166 | 0.209 | 0.168 | 0.163 | 0.453 | 0.240 | 0.288 | 0.191 | 0.083 | 0.281 | 0.178 | 0.069 | 0.073 | 0.901 | 0.107 | 0.353 |
| CCSD(Full)         | 0.163 | 0.142 | 0.641 | 0.358 | 0.142 | 0.142 | 0.142 | 0.652 | 0.837 | 0.451 | 1.184 | 0.947 | 0.667 | 0.622 | 0.314 | 0.163 | 0.984 |       |       |       |       |
|                    | 0.219 | 0.264 | 0.221 | 0.248 | 0.558 | 0.349 | 0.568 | 0.484 | 0.674 | 0.244 | 0.236 | 0.136 | 0.277 | 0.117 | 0.218 | 0.329 | 0.384 | 0.254 | 0.257 | 0.141 |       |
|                    | 0.277 | 0.121 | 0.227 | 0.365 | 0.170 | 0.188 | 0.207 | 0.163 | 0.189 | 0.442 | 0.244 | 0.279 | 0.168 | 0.075 | 0.219 | 0.159 | 0.076 | 0.092 | 0.900 | 0.103 | 0.340 |
| QCISD              | 0.172 | 0.142 | 0.707 | 0.406 | 0.142 | 0.142 | 0.142 | 0.707 | 1.030 | 0.472 | 1.182 | 0.950 | 0.665 | 0.627 | 0.319 | 0.164 | 0.983 |       |       |       |       |
|                    | 0.232 | 0.293 | 0.220 | 0.256 | 0.579 | 0.360 | 0.596 | 0.494 | 0.701 | 0.246 | 0.237 | 0.159 | 0.299 | 0.130 | 0.237 | 0.343 | 0.401 | 0.270 | 0.253 | 0.141 |       |
|                    | 0.283 | 0.118 | 0.244 | 0.381 | 0.179 | 0.166 | 0.210 | 0.166 | 0.163 | 0.455 | 0.241 | 0.288 | 0.190 | 0.082 | 0.282 | 0.172 | 0.068 | 0.072 | 0.887 | 0.104 | 0.353 |

[illegible]



|               |       |       |       |       |       |       |       |       |       |       |       |       |       |       |       |       |       |       |       |       |       |
|---------------|-------|-------|-------|-------|-------|-------|-------|-------|-------|-------|-------|-------|-------|-------|-------|-------|-------|-------|-------|-------|-------|
| PBEB95        | 0.339 | 0.381 | 0.113 | 0.118 | 0.381 | 0.381 | 0.381 | 0.114 | 0.077 | 0.138 | 0.708 | 0.578 | 0.138 | 0.082 | 0.310 | 0.181 | 0.763 | 0.076 | 0.054 | 0.046 |       |
|               | 0.247 | 0.071 | 0.497 | 0.358 | 0.193 | 0.204 | 0.090 | 0.114 | 0.066 | 0.389 | 0.395 | 0.184 | 0.095 | 0.165 | 0.095 | 0.088 | 0.063 | 0.089 | 0.391 | 0.185 |       |
|               | 0.096 | 0.184 | 0.089 | 0.063 | 0.060 | 0.145 | 0.097 | 0.061 | 0.166 | 0.105 | 0.449 | 0.076 | 0.056 | 0.063 | 0.071 | 0.076 | 0.065 | 0.073 | 0.019 | 0.086 | 0.191 |
| LGB95         | 0.283 | 0.318 | 0.083 | 0.100 | 0.318 | 0.318 | 0.318 | 0.097 | 0.092 | 0.106 | 0.684 | 0.554 | 0.096 | 0.072 | 0.294 | 0.112 | 0.753 | 0.116 | 0.122 | 0.070 |       |
|               | 0.230 | 0.065 | 0.373 | 0.300 | 0.153 | 0.142 | 0.081 | 0.116 | 0.080 | 0.334 | 0.359 | 0.119 | 0.093 | 0.120 | 0.093 | 0.073 | 0.081 | 0.066 | 0.336 | 0.119 |       |
|               | 0.094 | 0.119 | 0.066 | 0.081 | 0.096 | 0.157 | 0.095 | 0.098 | 0.160 | 0.116 | 0.411 | 0.102 | 0.100 | 0.098 | 0.104 | 0.102 | 0.099 | 0.088 | 0.085 | 0.085 | 0.177 |
| LGKCIS        | 0.317 | 0.387 | 0.115 | 0.124 | 0.387 | 0.387 | 0.387 | 0.115 | 0.092 | 0.118 | 0.757 | 0.644 | 0.163 | 0.116 | 0.361 | 0.177 | 0.799 | 0.437 | 0.167 | 0.198 |       |
|               | 0.258 | 0.065 | 0.468 | 0.339 | 0.219 | 0.205 | 0.132 | 0.099 | 0.100 | 0.368 | 0.385 | 0.195 | 0.114 | 0.207 | 0.112 | 0.118 | 0.081 | 0.144 | 0.371 | 0.196 |       |
|               | 0.114 | 0.185 | 0.144 | 0.080 | 0.069 | 0.136 | 0.112 | 0.068 | 0.138 | 0.095 | 0.421 | 0.104 | 0.056 | 0.041 | 0.105 | 0.061 | 0.041 | 0.045 | 0.001 | 0.031 | 0.208 |
| LC-PBEB95     | 0.227 | 0.275 | 0.081 | 0.081 | 0.275 | 0.275 | 0.275 | 0.081 | 0.098 | 0.106 | 0.689 | 0.577 | 0.072 | 0.083 | 0.355 | 0.140 | 0.761 | 0.210 | 0.066 | 0.069 |       |
|               | 0.197 | 0.086 | 0.410 | 0.324 | 0.156 | 0.141 | 0.086 | 0.095 | 0.085 | 0.353 | 0.368 | 0.144 | 0.099 | 0.137 | 0.099 | 0.087 | 0.086 | 0.087 | 0.354 | 0.146 |       |
|               | 0.100 | 0.138 | 0.087 | 0.086 | 0.097 | 0.140 | 0.099 | 0.095 | 0.140 | 0.095 | 0.426 | 0.121 | 0.100 | 0.107 | 0.120 | 0.099 | 0.096 | 0.110 | 0.088 | 0.087 | 0.179 |
| LC-PKZBB95    | 0.224 | 0.272 | 0.081 | 0.081 | 0.272 | 0.272 | 0.272 | 0.081 | 0.097 | 0.106 | 0.688 | 0.576 | 0.071 | 0.083 | 0.350 | 0.139 | 0.760 | 0.192 | 0.066 | 0.068 |       |
|               | 0.176 | 0.085 | 0.387 | 0.320 | 0.155 | 0.140 | 0.086 | 0.096 | 0.084 | 0.349 | 0.363 | 0.143 | 0.100 | 0.136 | 0.101 | 0.086 | 0.085 | 0.101 | 0.351 | 0.144 |       |
|               | 0.101 | 0.137 | 0.086 | 0.085 | 0.098 | 0.148 | 0.099 | 0.095 | 0.139 | 0.104 | 0.403 | 0.130 | 0.109 | 0.107 | 0.120 | 0.098 | 0.096 | 0.109 | 0.088 | 0.087 | 0.178 |
| LC-LGB95      | 0.249 | 0.253 | 0.080 | 0.081 | 0.253 | 0.253 | 0.253 | 0.080 | 0.098 | 0.107 | 0.689 | 0.577 | 0.072 | 0.083 | 0.354 | 0.140 | 0.761 | 0.190 | 0.068 | 0.105 |       |
|               | 0.198 | 0.086 | 0.392 | 0.324 | 0.156 | 0.140 | 0.086 | 0.096 | 0.085 | 0.361 | 0.369 | 0.144 | 0.100 | 0.136 | 0.109 | 0.087 | 0.086 | 0.087 | 0.363 | 0.145 |       |
|               | 0.102 | 0.137 | 0.087 | 0.086 | 0.106 | 0.125 | 0.099 | 0.095 | 0.115 | 0.105 | 0.426 | 0.123 | 0.110 | 0.108 | 0.120 | 0.099 | 0.098 | 0.110 | 0.087 | 0.087 | 0.179 |
| LC-LGKCIS     | 0.344 | 0.417 | 0.091 | 0.085 | 0.417 | 0.417 | 0.417 | 0.091 | 0.215 | 0.134 | 0.770 | 0.703 | 0.153 | 0.218 | 0.406 | 0.223 | 0.772 | 0.173 | 0.080 | 0.204 |       |
|               | 0.240 | 0.159 | 0.513 | 0.368 | 0.204 | 0.251 | 0.143 | 0.195 | 0.211 | 0.378 | 0.400 | 0.225 | 0.205 | 0.238 | 0.187 | 0.152 | 0.219 | 0.168 | 0.381 | 0.227 |       |
|               | 0.207 | 0.221 | 0.167 | 0.218 | 0.137 | 0.130 | 0.180 | 0.132 | 0.127 | 0.188 | 0.432 | 0.193 | 0.184 | 0.146 | 0.193 | 0.180 | 0.102 | 0.126 | 0.146 | 0.101 | 0.248 |
| B3LYP-D2      | 0.361 | 0.412 | 0.122 | 0.152 | 0.412 | 0.412 | 0.412 | 0.122 | 0.087 | 0.119 | 0.721 | 0.593 | 0.147 | 0.220 | 0.378 | 0.199 | 0.776 | 0.199 | 0.379 | 0.351 |       |
|               | 0.253 | 0.105 | 0.552 | 0.363 | 0.186 | 0.224 | 0.122 | 0.242 | 0.207 | 0.380 | 0.398 | 0.227 | 0.278 | 0.243 | 0.278 | 0.124 | 0.202 | 0.159 | 0.383 | 0.229 |       |
|               | 0.276 | 0.231 | 0.160 | 0.204 | 0.224 | 0.250 | 0.244 | 0.145 | 0.181 | 0.213 | 0.422 | 0.232 | 0.124 | 0.169 | 0.233 | 0.140 | 0.167 | 0.242 | 0.151 | 0.163 | 0.265 |
| M06-D3        | 0.126 | 0.155 | 0.069 | 0.067 | 0.155 | 0.155 | 0.155 | 0.070 | 0.173 | 0.071 | 0.681 | 0.637 | 0.065 | 0.126 | 0.147 | 0.146 | 0.697 | 0.166 | 0.128 | 0.107 |       |
|               | 0.070 | 0.077 | 0.309 | 0.087 | 0.068 | 0.060 | 0.137 | 0.062 | 0.137 | 0.143 | 0.151 | 0.057 | 0.060 | 0.066 | 0.060 | 0.136 | 0.136 | 0.136 | 0.143 | 0.057 |       |
|               | 0.059 | 0.067 | 0.136 | 0.136 | 0.061 | 0.058 | 0.059 | 0.061 | 0.058 | 0.062 | 0.156 | 0.059 | 0.060 | 0.061 | 0.059 | 0.060 | 0.061 | 0.061 | 0.074 | 0.075 | 0.129 |
| M062X-D3      | 0.329 | 0.371 | 0.137 | 0.129 | 0.371 | 0.371 | 0.371 | 0.136 | 0.153 | 0.143 | 0.777 | 0.722 | 0.166 | 0.186 | 0.359 | 0.208 | 0.722 | 0.186 | 0.134 | 0.099 |       |
|               | 0.247 | 0.133 | 0.539 | 0.342 | 0.225 | 0.154 | 0.148 | 0.098 | 0.145 | 0.345 | 0.355 | 0.152 | 0.102 | 0.155 | 0.101 | 0.147 | 0.143 | 0.150 | 0.347 | 0.155 |       |
|               | 0.105 | 0.151 | 0.150 | 0.143 | 0.079 | 0.138 | 0.103 | 0.082 | 0.150 | 0.098 | 0.376 | 0.123 | 0.088 | 0.086 | 0.122 | 0.094 | 0.090 | 0.101 | 0.040 | 0.036 | 0.210 |
| B3LYP-D3      | 0.346 | 0.406 | 0.083 | 0.098 | 0.406 | 0.406 | 0.406 | 0.084 | 0.077 | 0.095 | 0.700 | 0.581 | 0.122 | 0.071 | 0.348 | 0.141 | 0.769 | 0.248 | 0.412 | 0.369 |       |
|               | 0.225 | 0.074 | 0.559 | 0.350 | 0.186 | 0.173 | 0.077 | 0.138 | 0.068 | 0.372 | 0.391 | 0.172 | 0.172 | 0.183 | 0.154 | 0.074 | 0.061 | 0.090 | 0.375 | 0.173 |       |
|               | 0.173 | 0.170 | 0.091 | 0.060 | 0.109 | 0.140 | 0.125 | 0.114 | 0.161 | 0.118 | 0.418 | 0.119 | 0.106 | 0.072 | 0.119 | 0.113 | 0.073 | 0.087 | 0.066 | 0.128 | 0.213 |
| PBE1PBE-D3    | 0.314 | 0.372 | 0.108 | 0.115 | 0.372 | 0.372 | 0.372 | 0.108 | 0.097 | 0.114 | 0.696 | 0.586 | 0.143 | 0.101 | 0.342 | 0.136 | 0.755 | 0.189 | 0.348 | 0.295 |       |
|               | 0.226 | 0.092 | 0.524 | 0.337 | 0.200 | 0.161 | 0.113 | 0.094 | 0.093 | 0.352 | 0.367 | 0.166 | 0.106 | 0.175 | 0.110 | 0.106 | 0.084 | 0.117 | 0.355 | 0.168 |       |
|               | 0.108 | 0.169 | 0.118 | 0.085 | 0.105 | 0.145 | 0.111 | 0.107 | 0.158 | 0.100 | 0.393 | 0.125 | 0.116 | 0.099 | 0.124 | 0.121 | 0.102 | 0.113 | 0.119 | 0.134 | 0.209 |
| LC-wPBE-D3    | 0.293 | 0.344 | 0.076 | 0.070 | 0.344 | 0.344 | 0.344 | 0.076 | 0.170 | 0.086 | 0.703 | 0.669 | 0.092 | 0.204 | 0.329 | 0.159 | 0.734 | 0.121 | 0.315 | 0.204 |       |
|               | 0.180 | 0.147 | 0.512 | 0.303 | 0.168 | 0.211 | 0.109 | 0.187 | 0.171 | 0.324 | 0.340 | 0.175 | 0.171 | 0.181 | 0.169 | 0.105 | 0.167 | 0.117 | 0.327 | 0.176 |       |
|               | 0.172 | 0.165 | 0.116 | 0.166 | 0.156 | 0.143 | 0.167 | 0.153 | 0.127 | 0.184 | 0.369 | 0.162 | 0.167 | 0.172 | 0.162 | 0.175 | 0.169 | 0.193 | 0.153 | 0.144 | 0.222 |
| PBEPBE-D3BJ   | 0.331 | 0.390 | 0.134 | 0.144 | 0.390 | 0.390 | 0.390 | 0.134 | 0.095 | 0.136 | 0.713 | 0.578 | 0.169 | 0.095 | 0.370 | 0.168 | 0.769 | 0.164 | 0.294 | 0.287 |       |
|               | 0.251 | 0.103 | 0.550 | 0.352 | 0.219 | 0.166 | 0.120 | 0.086 | 0.091 | 0.372 | 0.388 | 0.187 | 0.100 | 0.199 | 0.106 | 0.115 | 0.085 | 0.128 | 0.375 | 0.188 |       |
|               | 0.101 | 0.189 | 0.129 | 0.085 | 0.111 | 0.157 | 0.112 | 0.114 | 0.162 | 0.093 | 0.415 | 0.117 | 0.106 | 0.107 | 0.121 | 0.110 | 0.109 | 0.123 | 0.108 | 0.154 | 0.217 |
| TPSSTPSS-D3BJ | 0.237 | 0.264 | 0.131 | 0.129 | 0.264 | 0.264 | 0.264 | 0.130 | 0.127 | 0.109 | 0.725 | 0.658 | 0.129 | 0.124 | 0.257 | 0.148 | 0.758 | 0.159 | 0.265 | 0.275 |       |
|               | 0.214 | 0.103 | 0.466 | 0.256 | 0.187 | 0.149 | 0.138 | 0.093 | 0.100 | 0.293 | 0.308 | 0.149 | 0.108 | 0.155 | 0.105 | 0.134 | 0.096 | 0.140 | 0.296 | 0.150 |       |
|               | 0.109 | 0.153 | 0.140 | 0.095 | 0.100 | 0.111 | 0.105 | 0.098 | 0.113 | 0.094 | 0.340 | 0.100 | 0.098 | 0.089 | 0.100 | 0.100 | 0.089 | 0.101 | 0.095 | 0.104 | 0.190 |
| B3LYP-D3BJ    | 0.303 | 0.373 | 0.030 | 0.042 | 0.373 | 0.373 | 0.373 | 0.030 | 0.168 | 0.174 | 0.684 | 0.605 | 0.079 | 0.259 | 0.311 | 0.090 | 0.752 | 0.181 | 0.343 | 0.284 |       |
|               | 0.187 | 0.157 | 0.551 | 0.315 | 0.151 | 0.120 | 0.042 | 0.173 | 0.191 | 0.334 | 0.365 | 0.128 | 0.209 | 0.150 | 0.206 | 0.036 | 0.158 | 0.054 | 0.337 | 0.129 |       |
|               | 0.210 | 0.139 | 0.056 | 0.159 | 0.162 | 0.218 | 0.204 | 0.158 | 0.197 | 0.166 | 0.398 | 0.206 | 0.190 | 0.146 | 0.206 | 0.111 | 0.092 | 0.127 | 0.406 | 0.358 | 0.229 |
| PBE1PBE-D3BJ  | 0.288 | 0.350 | 0.101 | 0.103 | 0.350 | 0.350 | 0.350 | 0.101 | 0.095 | 0.100 | 0.689 | 0.596 | 0.131 | 0.098 | 0.333 | 0.127 | 0.751 | 0.116 | 0.239 | 0.228 |       |
|               | 0.219 | 0.078 | 0.517 | 0.318 | 0.    |       |       |       |       |       |       |       |       |       |       |       |       |       |       |       |       |

<sup>a</sup> The three rows after a method correspond to the results of this method calculated with the first 20 basis sets (ie. BS21 to BS40), the second 20 ones (i.e. BS41 to BS60), and the third 20 ones (i.e. BS61 to BS80) and Ave.

<sup>b</sup> Likewise, a blank means that this method/basis set does not calculate these 11-RG-Mols, so LanL2MB (or BS38), STO-3G (or BS39), and STO-6G (or BS40) cannot calculate these 11-RG-Mols when using *ab initio* and double-hybrid methods.

<sup>c</sup> For basis sets UGBS (or BS79) and UGBS1V++ (BS80), these DFT methods can calculate only three molecules (i.e., He<sub>2</sub>, HeNe, and Ne<sub>2</sub>), just as Dreiding in Table S2.

<sup>d</sup> As in Table S2, a green or blue value means, respectively, that this MAD is smaller than 0.020 Å or is between 0.020~0.100 Å, while a black one means that this value is larger than 0.100 Å in which the largest one is shown with red.

Table S6. MDs (Å) of 11-RG-Mols calculated by 54 methods and 60 basis sets.

|                    | BS21   | BS22   | BS23   | BS24   | BS25   | BS26   | BS27   | BS28   | BS29   | BS30   | BS31   | BS32   | BS33   | BS34   | BS35   | BS36   | BS37   | BS38   | BS39   | BS40   |        |
|--------------------|--------|--------|--------|--------|--------|--------|--------|--------|--------|--------|--------|--------|--------|--------|--------|--------|--------|--------|--------|--------|--------|
|                    | BS41   | BS42   | BS43   | BS44   | BS45   | BS46   | BS47   | BS48   | BS49   | BS50   | BS51   | BS52   | BS53   | BS54   | BS55   | BS56   | BS57   | BS58   | BS59   | BS60   |        |
|                    | BS61   | BS62   | BS63   | BS64   | BS65   | BS66   | BS67   | BS68   | BS69   | BS70   | BS71   | BS72   | BS73   | BS74   | BS75   | BS76   | BS77   | BS78   | BS79   | BS80   | Ave    |
| MP2                | 0.051  | -0.140 | 0.715  | 0.366  | -0.140 | -0.140 | -0.140 | 0.715  | 1.064  | 0.469  | -0.050 | -0.060 | 0.675  | 0.641  | 0.091  | 0.134  | -0.343 |        |        |        |        |
|                    | 0.067  | 0.259  | -0.192 | 0.149  | 0.523  | 0.381  | 0.623  | 0.501  | 0.718  | -0.070 | -0.132 | 0.147  | 0.272  | 0.107  | 0.215  | 0.334  | 0.379  | 0.253  | -0.081 | 0.114  |        |
|                    | 0.237  | 0.076  | 0.224  | 0.349  | 0.114  | -0.015 | 0.171  | 0.090  | -0.042 | 0.468  | -0.154 | 0.267  | 0.125  | 0.057  | 0.240  | 0.085  | 0.012  | -0.044 | 0.893  | 0.093  | 0.206  |
| MP2(Full)          | 0.046  | -0.147 | 0.636  | 0.319  | -0.147 | -0.147 | -0.147 | 0.647  | 0.831  | 0.430  | -0.050 | -0.060 | 0.675  | 0.641  | 0.086  | 0.134  | -0.343 |        |        |        |        |
|                    | 0.050  | 0.230  | -0.198 | 0.144  | 0.503  | 0.369  | 0.599  | 0.490  | 0.692  | -0.080 | -0.145 | 0.116  | 0.233  | 0.077  | 0.180  | 0.320  | 0.364  | 0.237  | -0.095 | 0.087  |        |
|                    | 0.202  | 0.050  | 0.207  | 0.339  | 0.065  | -0.088 | 0.140  | 0.034  | -0.161 | 0.087  | -0.165 | 0.254  | 0.078  | 0.008  | 0.174  | 0.043  | -0.037 | -0.099 | 0.892  | 0.089  | 0.170  |
| DSDPBEP86          | -0.194 | -0.295 | 0.150  | 0.054  | -0.295 | -0.295 | -0.295 | 0.149  | 0.269  | 0.017  | -0.498 | -0.368 | 0.106  | 0.198  | -0.226 | -0.024 | -0.615 |        |        |        |        |
|                    | -0.111 | 0.039  | -0.420 | -0.183 | 0.027  | 0.116  | 0.152  | 0.254  | 0.231  | -0.252 | -0.282 | -0.041 | 0.099  | -0.059 | 0.052  | 0.054  | 0.121  | 0.034  | -0.260 | -0.054 |        |
|                    | 0.083  | -0.072 | 0.024  | 0.110  | -0.023 | -0.104 | 0.034  | -0.038 | -0.152 | 0.222  | -0.321 | 0.050  | -0.023 | -0.048 | 0.038  | -0.040 | -0.062 | -0.089 | 0.271  | 0.001  | -0.049 |
| DSDPBEP86(Full)    | -0.197 | -0.299 | 0.135  | 0.044  | -0.299 | -0.299 | -0.299 | 0.139  | 0.256  | 0.007  | -0.498 | -0.368 | 0.106  | 0.198  | -0.227 | -0.024 | -0.615 |        |        |        |        |
|                    | -0.116 | 0.027  | -0.423 | -0.186 | 0.025  | 0.114  | 0.146  | 0.253  | 0.226  | -0.257 | -0.288 | -0.049 | 0.084  | -0.066 | 0.044  | 0.050  | 0.118  | 0.031  | -0.265 | -0.067 |        |
|                    | 0.068  | -0.085 | 0.018  | 0.101  | -0.041 | -0.144 | 0.019  | -0.059 | -0.183 | 0.217  | -0.326 | 0.043  | -0.039 | -0.064 | 0.032  | -0.058 | -0.079 | -0.125 | 0.272  | 0.001  | -0.057 |
| revDSDPBEP86       | -0.189 | -0.287 | 0.161  | 0.072  | -0.287 | -0.287 | -0.287 | 0.161  | 0.285  | 0.031  | -0.489 | -0.359 | 0.114  | 0.210  | -0.220 | -0.006 | -0.607 |        |        |        |        |
|                    | -0.100 | 0.057  | -0.415 | -0.178 | 0.037  | 0.122  | 0.159  | 0.262  | 0.242  | -0.246 | -0.274 | -0.032 | 0.112  | -0.048 | 0.064  | 0.064  | 0.132  | 0.044  | -0.253 | -0.044 |        |
|                    | 0.097  | -0.061 | 0.037  | 0.126  | -0.001 | -0.070 | 0.046  | -0.017 | -0.116 | 0.231  | -0.314 | 0.069  | -0.002 | -0.025 | 0.051  | -0.024 | -0.043 | -0.071 | 0.271  | 0.014  | -0.036 |
| revDSDPBEP86(Full) | -0.192 | -0.290 | 0.146  | 0.054  | -0.290 | -0.290 | -0.290 | 0.150  | 0.271  | 0.022  | -0.489 | -0.359 | 0.114  | 0.209  | -0.221 | -0.006 | -0.608 |        |        |        |        |
|                    | -0.105 | 0.048  | -0.418 | -0.181 | 0.033  | 0.120  | 0.156  | 0.259  | 0.236  | -0.251 | -0.280 | -0.038 | 0.101  | -0.054 | 0.056  | 0.061  | 0.129  | 0.041  | -0.259 | -0.051 |        |
|                    | 0.086  | -0.069 | 0.034  | 0.122  | -0.022 | -0.123 | 0.038  | -0.036 | -0.165 | 0.227  | -0.318 | 0.063  | -0.019 | -0.049 | 0.046  | -0.042 | -0.064 | -0.096 | 0.271  | 0.014  | -0.045 |
| B2PLYPD            | -0.302 | -0.373 | 0.063  | -0.051 | -0.373 | -0.373 | -0.373 | 0.062  | 0.129  | -0.039 | -0.558 | -0.415 | 0.035  | 0.258  | -0.312 | -0.129 | -0.683 |        |        |        |        |
|                    | -0.187 | -0.038 | -0.524 | -0.287 | -0.035 | -0.045 | 0.054  | 0.161  | 0.227  | -0.332 | -0.354 | -0.146 | 0.076  | -0.160 | -0.023 | -0.036 | 0.141  | -0.072 | -0.337 | -0.157 |        |
|                    | 0.062  | -0.161 | -0.080 | 0.140  | -0.070 | -0.117 | -0.034 | -0.080 | -0.158 | 0.090  | -0.379 | -0.037 | -0.090 | -0.111 | -0.052 | -0.122 | -0.128 | -0.155 | 0.286  | -0.134 | -0.120 |
| B2PLYPD(Full)      | -0.304 | -0.376 | 0.053  | -0.057 | -0.376 | -0.376 | -0.376 | 0.055  | 0.124  | -0.049 | -0.558 | -0.415 | 0.035  | 0.258  | -0.313 | -0.129 | -0.683 |        |        |        |        |
|                    | -0.191 | -0.044 | -0.525 | -0.288 | -0.036 | -0.048 | 0.051  | 0.158  | 0.231  | -0.334 | -0.356 | -0.151 | 0.065  | -0.164 | -0.028 | -0.039 | 0.140  | -0.075 | -0.340 | -0.161 |        |
|                    | 0.055  | -0.166 | -0.083 | 0.129  | -0.080 | -0.150 | -0.030 | -0.093 | -0.181 | 0.085  | -0.381 | -0.042 | -0.098 | -0.124 | -0.056 | -0.131 | -0.141 | -0.170 | 0.286  | -0.132 | -0.125 |
| B2PLYPD-D3         | -0.299 | -0.378 | 0.128  | 0.010  | -0.378 | -0.378 | -0.378 | 0.126  | 0.216  | 0.032  | -0.552 | -0.376 | 0.077  | 0.332  | -0.297 | -0.104 | -0.685 |        |        |        |        |
|                    | -0.178 | 0.036  | -0.534 | -0.279 | -0.011 | 0.038  | 0.117  | 0.268  | 0.333  | -0.328 | -0.356 | -0.128 | 0.103  | -0.144 | 0.079  | 0.013  | 0.181  | -0.041 | -0.334 | -0.139 |        |
|                    | 0.093  | -0.143 | -0.048 | 0.164  | -0.022 | -0.100 | 0.019  | -0.035 | -0.146 | 0.215  | -0.384 | 0.029  | -0.002 | -0.070 | 0.002  | -0.056 | -0.095 | -0.132 | 0.059  | -0.035 | -0.086 |
| B2PLYPD-D3(Full)   | -0.301 | -0.380 | 0.114  | -0.001 | -0.380 | -0.379 | -0.380 | 0.118  | 0.209  | 0.029  | -0.552 | -0.376 | 0.077  | 0.332  | -0.298 | -0.104 | -0.685 |        |        |        |        |
|                    | -0.180 | 0.031  | -0.535 | -0.282 | -0.008 | 0.036  | 0.113  | 0.238  | 0.290  | -0.331 | -0.359 | -0.133 | 0.097  | -0.148 | 0.063  | 0.010  | 0.169  | -0.044 | -0.338 | -0.144 |        |
|                    | 0.087  | -0.148 | -0.051 | 0.166  | -0.036 | -0.135 | 0.011  | -0.048 | -0.167 | 0.177  | -0.387 | 0.024  | -0.019 | -0.081 | -0.001 | -0.066 | -0.118 | -0.152 | 0.060  | -0.036 | -0.093 |
| B2PLYPD3           | -0.260 | -0.345 | 0.169  | 0.060  | -0.345 | -0.345 | -0.345 | 0.168  | 0.339  | 0.077  | -0.510 | -0.344 | 0.100  | 0.368  | -0.264 | -0.044 | -0.644 |        |        |        |        |
|                    | -0.134 | 0.158  | -0.518 | -0.242 | 0.023  | 0.071  | 0.139  | 0.264  | 0.335  | -0.296 | -0.325 | -0.070 | 0.152  | -0.088 | 0.121  | 0.054  | 0.217  | 0.020  | -0.302 | -0.081 |        |
|                    | 0.137  | -0.090 | 0.013  | 0.248  | 0.070  | -0.049 | 0.112  | -0.003 | -0.076 | 0.255  | -0.357 | 0.111  | 0.022  | -0.004 | 0.097  | -0.015 | -0.036 | -0.059 | 0.397  | 0.000  | -0.033 |
| B2PLYPD3(Full)     | -0.262 | -0.347 | 0.160  | 0.050  | -0.347 | -0.347 | -0.347 | 0.161  | 0.332  | 0.067  | -0.510 | -0.344 | 0.100  | 0.368  | -0.264 | -0.044 | -0.644 |        |        |        |        |
|                    | -0.137 | 0.130  | -0.519 | -0.243 | 0.022  | 0.070  | 0.136  | 0.259  | 0.331  | -0.299 | -0.329 | -0.076 | 0.146  | -0.094 | 0.115  | 0.052  | 0.214  | 0.016  | -0.306 | -0.088 |        |
|                    | 0.121  | -0.097 | 0.011  | 0.213  | 0.054  | -0.083 | 0.105  | -0.021 | -0.129 | 0.253  | -0.359 | 0.107  | 0.001  | -0.017 | 0.094  | -0.042 | -0.047 | -0.077 | 0.396  | 0.000  | -0.041 |
| MP3                | 0.058  | -0.117 | 0.728  | 0.409  | -0.117 | -0.117 | -0.117 | 0.729  | 1.049  | 0.487  | -0.046 | -0.077 | 0.687  | 0.627  | 0.111  | 0.167  | -0.336 |        |        |        |        |
|                    | 0.119  | 0.284  | -0.180 | 0.163  | 0.534  | 0.368  | 0.597  | 0.492  | 0.699  | -0.053 | -0.114 | 0.149  | 0.278  | 0.112  | 0.214  | 0.337  | 0.379  | 0.257  | -0.064 | 0.118  |        |
|                    | 0.244  | 0.083  | 0.226  | 0.353  | 0.136  | -0.004 | 0.172  | 0.105  | -0.028 | 0.451  | -0.136 | 0.273  | 0.147  | 0.077  | 0.242  | 0.108  | 0.036  | -0.016 | 0.916  | -0.646 | 0.203  |
| MP3(Full)          | 0.055  | -0.123 | 0.655  | 0.360  | -0.123 | -0.123 | -0.123 | 0.667  | 0.837  | 0.463  | -0.046 | -0.077 | 0.687  | 0.627  | 0.107  | 0.167  | -0.336 |        |        |        |        |
|                    | 0.103  | 0.259  | -0.185 | 0.157  | 0.517  | 0.358  | 0.575  | 0.482  | 0.676  | -0.063 | -0.126 | 0.123  | 0.244  | 0.087  | 0.184  | 0.324  | 0.366  | 0.242  | -0.078 | 0.092  |        |
|                    | 0.212  | 0.059  | 0.211  | 0.344  | 0.087  | -0.053 | 0.142  | 0.054  | -0.082 | 0.438  | -0.146 | 0.260  | 0.104  | 0.040  | 0.170  | 0.070  | -0.011 | -0.069 | 0.902  | 0.087  | 0.190  |
| CCSD               | 0.047  | -0.115 | 0.710  | 0.409  | -0.115 | -0.115 | -0.115 | 0.710  | 1.030  | 0.476  | -0.057 | -0.084 | 0.667  | 0.622  | 0.093  | 0.163  | -0.339 |        |        |        |        |
|                    | 0.119  | 0.292  | -0.179 | 0.152  | 0.524  | 0.354  | 0.594  | 0.492  | 0.699  | -0.062 | -0.115 | 0.145  | 0.288  | 0.119  | 0.226  | 0.342  | 0.400  | 0.269  | -0.073 | 0.109  |        |
|                    | 0.251  | 0.086  | 0.243  | 0.380  | 0.145  | 0.001  | 0.178  | 0.122  | -0.014 | 0.453  | -0.136 | 0.278  | 0.160  | 0.083  | 0.255  | 0.128  | 0.058  | 0.002  | 0.901  | 0.107  | 0.217  |
| CCSD(Full)         | 0.043  | -0.122 | 0.641  | 0.358  | -0.122 | -0.122 | -0.122 | 0.652  | 0.837  | 0.451  | -0.057 | -0.084 | 0.667  | 0.622  | 0.092  | 0.163  | -0.339 |        |        |        |        |
|                    | 0.101  | 0.264  | -0.184 | 0.146  | 0.501  | 0.349  | 0.568  | 0.484  | 0.674  | -0.076 | -0.129 | 0.106  | 0.247  | 0.087  | 0.188  | 0.329  | 0.384  | 0.254  | -0.087 | 0.086  |        |
|                    | 0.222  | 0.066  | 0.227  | 0.365  | 0.097  | -0.050 | 0.152  | 0.073  | -0.070 | 0.442  | -0.147 | 0.265  | 0.114  | 0.048  | 0.189  | 0.087  | 0.007  | -0.065 | 0.900  | 0.103  | 0.191  |
| QCISD              | 0.052  | -0.116 | 0.707  | 0.406  | -0.116 | -0.116 | -0.116 | 0.707  | 1.030  | 0.472  | -0.060 | -0.081 | 0.665  | 0.627  | 0.096  | 0.164  | -0.340 |        |        |        |        |
|                    | 0.116  | 0.293  | -0.179 | 0.154  | 0.522  | 0.360  | 0.596  | 0.494  | 0.701  | -0.064 | -0.116 | 0.148  | 0.288  | 0.119  | 0.226  | 0.343  | 0.401  | 0.270  | -0.075 | 0.109  |        |
|                    | 0.250  | 0.086  | 0.244  | 0.381  | 0.144  | 0.001  | 0.177  | 0.120  | -0.015 | 0.455  | -0.137 | 0.278  | 0.159  | 0.082  | 0.255  | 0.121  | 0.056  | 0.001  | 0.887  | 0.104  | 0.216  |

S36

|               |        |        |        |        |        |        |        |        |        |        |        |        |        |        |        |        |        |        |        |        |
|---------------|--------|--------|--------|--------|--------|--------|--------|--------|--------|--------|--------|--------|--------|--------|--------|--------|--------|--------|--------|--------|
| PBEB95        | -0.339 | -0.381 | -0.101 | -0.107 | -0.381 | -0.381 | -0.381 | -0.102 | -0.017 | -0.134 | -0.646 | -0.483 | -0.082 | 0.031  | -0.310 | -0.169 | -0.763 | -0.052 | -0.027 | -0.032 |
|               | -0.247 | -0.049 | -0.497 | -0.358 | -0.193 | -0.095 | -0.037 | 0.027  | 0.016  | -0.389 | -0.395 | -0.184 | -0.061 | -0.165 | -0.062 | -0.080 | -0.026 | -0.081 | -0.391 | -0.185 |
|               | -0.062 | -0.184 | -0.081 | -0.026 | -0.041 | -0.128 | -0.064 | -0.043 | -0.150 | 0.017  | -0.449 | -0.031 | -0.023 | -0.053 | -0.040 | -0.043 | -0.055 | -0.063 | -0.019 | -0.086 |
| LGB95         | -0.283 | -0.318 | -0.033 | -0.052 | -0.318 | -0.318 | -0.318 | -0.047 | 0.034  | -0.059 | -0.670 | -0.509 | -0.051 | 0.022  | -0.294 | -0.099 | -0.735 | 0.066  | 0.095  | 0.045  |
|               | -0.230 | 0.000  | -0.373 | -0.300 | -0.116 | -0.006 | 0.020  | 0.058  | 0.022  | -0.334 | -0.359 | -0.048 | 0.016  | -0.049 | 0.015  | 0.007  | 0.020  | 0.000  | -0.336 | -0.049 |
|               | 0.015  | -0.049 | 0.000  | 0.020  | 0.022  | -0.123 | 0.012  | 0.019  | -0.127 | 0.057  | -0.411 | 0.021  | 0.021  | 0.020  | 0.018  | 0.018  | 0.017  | 0.005  | 0.052  | 0.050  |
| LGKCIS        | -0.311 | -0.387 | 0.024  | -0.017 | -0.387 | -0.387 | -0.387 | 0.024  | 0.085  | -0.004 | -0.556 | -0.402 | -0.013 | 0.116  | -0.320 | -0.072 | -0.661 | 0.437  | 0.167  | 0.198  |
|               | -0.179 | 0.047  | -0.468 | -0.326 | -0.080 | -0.015 | 0.060  | 0.099  | 0.100  | -0.360 | -0.377 | -0.082 | 0.051  | -0.093 | 0.048  | 0.042  | 0.080  | 0.015  | -0.363 | -0.086 |
|               | 0.047  | -0.075 | 0.015  | 0.080  | 0.033  | -0.031 | 0.045  | 0.025  | -0.037 | 0.095  | -0.413 | 0.063  | 0.011  | 0.019  | 0.060  | 0.004  | 0.013  | 0.001  | -0.001 | -0.031 |
| LC-PBEB95     | -0.210 | -0.275 | 0.010  | 0.008  | -0.275 | -0.275 | -0.275 | 0.009  | 0.032  | -0.063 | -0.619 | -0.499 | -0.024 | 0.020  | -0.338 | -0.030 | -0.742 | 0.148  | 0.023  | 0.043  |
|               | -0.166 | 0.017  | -0.410 | -0.307 | -0.123 | -0.027 | 0.017  | 0.037  | 0.019  | -0.336 | -0.368 | -0.035 | 0.028  | -0.044 | 0.028  | 0.016  | 0.018  | 0.015  | -0.338 | -0.037 |
|               | 0.027  | -0.045 | 0.015  | 0.018  | 0.031  | -0.033 | 0.028  | 0.032  | -0.033 | 0.036  | -0.426 | 0.008  | 0.004  | 0.020  | 0.008  | 0.005  | 0.031  | 0.018  | 0.055  | 0.055  |
| LC-PKZBB95    | -0.208 | -0.272 | 0.011  | 0.009  | -0.272 | -0.272 | -0.272 | 0.011  | 0.032  | -0.063 | -0.618 | -0.498 | -0.023 | 0.021  | -0.333 | -0.028 | -0.741 | 0.131  | 0.024  | 0.042  |
|               | -0.145 | 0.017  | -0.387 | -0.304 | -0.122 | -0.025 | 0.017  | 0.037  | 0.020  | -0.333 | -0.363 | -0.033 | 0.029  | -0.042 | 0.027  | 0.016  | 0.019  | 0.001  | -0.335 | -0.035 |
|               | 0.028  | -0.043 | 0.016  | 0.019  | 0.031  | -0.041 | 0.029  | 0.032  | -0.032 | 0.028  | -0.403 | 0.000  | 0.021  | 0.022  | 0.009  | 0.031  | 0.031  | 0.020  | 0.055  | 0.055  |
| LC-LGB95      | -0.232 | -0.253 | 0.010  | 0.008  | -0.253 | -0.253 | -0.253 | 0.009  | 0.032  | -0.063 | -0.619 | -0.499 | -0.025 | 0.020  | -0.338 | -0.030 | -0.743 | 0.128  | 0.025  | 0.079  |
|               | -0.167 | 0.017  | -0.392 | -0.307 | -0.123 | -0.026 | 0.017  | 0.036  | 0.019  | -0.344 | -0.369 | -0.035 | 0.027  | -0.044 | 0.018  | 0.016  | 0.018  | 0.015  | -0.346 | -0.036 |
|               | 0.026  | -0.045 | 0.015  | 0.018  | 0.022  | -0.068 | 0.027  | 0.031  | -0.059 | 0.027  | -0.426 | 0.007  | -0.005 | -0.005 | 0.008  | 0.004  | 0.005  | 0.018  | 0.055  | 0.055  |
| LC-LGKCIS     | -0.344 | -0.417 | 0.065  | 0.031  | -0.417 | -0.417 | -0.417 | 0.066  | 0.215  | 0.044  | -0.513 | -0.340 | 0.088  | 0.218  | -0.354 | 0.004  | -0.710 | 0.173  | 0.080  | 0.204  |
|               | -0.145 | 0.159  | -0.513 | -0.352 | -0.060 | 0.023  | 0.139  | 0.179  | 0.211  | -0.366 | -0.388 | -0.060 | 0.125  | -0.074 | 0.106  | 0.148  | 0.219  | 0.131  | -0.369 | -0.064 |
|               | 0.121  | -0.058 | 0.131  | 0.218  | 0.098  | 0.023  | 0.095  | 0.091  | 0.015  | 0.171  | -0.419 | 0.141  | 0.154  | 0.129  | 0.137  | 0.147  | 0.084  | 0.096  | 0.146  | 0.101  |
| B3LYP-D2      | -0.361 | -0.412 | -0.104 | -0.152 | -0.412 | -0.412 | -0.412 | -0.105 | -0.063 | -0.117 | -0.685 | -0.557 | -0.121 | 0.081  | -0.378 | -0.192 | -0.762 | -0.170 | -0.379 | -0.351 |
|               | -0.253 | -0.102 | -0.552 | -0.363 | -0.170 | -0.182 | -0.100 | 0.036  | 0.049  | -0.380 | -0.398 | -0.216 | 0.028  | -0.233 | 0.026  | -0.116 | 0.039  | -0.151 | -0.383 | -0.219 |
|               | 0.022  | -0.221 | -0.153 | 0.038  | -0.014 | -0.071 | -0.014 | -0.096 | -0.161 | -0.001 | -0.422 | -0.011 | -0.119 | -0.110 | -0.014 | -0.136 | -0.126 | -0.076 | -0.151 | -0.163 |
| M06-D3        | -0.069 | -0.102 | 0.057  | 0.054  | -0.102 | -0.102 | -0.102 | 0.058  | 0.173  | 0.060  | -0.567 | -0.408 | 0.051  | 0.116  | -0.102 | 0.129  | -0.625 | -0.084 | -0.105 | -0.107 |
|               | 0.012  | 0.062  | -0.276 | -0.052 | 0.018  | 0.037  | 0.125  | 0.046  | 0.126  | -0.109 | -0.118 | 0.031  | 0.040  | 0.023  | 0.040  | 0.124  | 0.125  | 0.124  | -0.110 | 0.031  |
|               | 0.039  | 0.024  | 0.123  | 0.125  | 0.041  | 0.031  | 0.038  | 0.040  | 0.031  | 0.045  | -0.125 | 0.041  | 0.040  | 0.042  | 0.040  | 0.038  | 0.041  | 0.046  | 0.074  | 0.075  |
| M062X-D3      | -0.329 | -0.371 | 0.082  | 0.064  | -0.371 | -0.371 | -0.371 | 0.081  | 0.137  | 0.041  | -0.501 | -0.320 | 0.076  | 0.172  | -0.278 | 0.060  | -0.722 | -0.186 | -0.117 | -0.071 |
|               | -0.068 | 0.075  | -0.539 | -0.300 | -0.020 | -0.036 | 0.089  | 0.023  | 0.098  | -0.320 | -0.330 | -0.092 | -0.030 | -0.096 | -0.032 | 0.086  | 0.095  | 0.083  | -0.323 | -0.096 |
|               | -0.033 | -0.091 | 0.082  | 0.095  | -0.010 | -0.083 | -0.037 | -0.015 | -0.094 | 0.020  | -0.351 | 0.005  | -0.017 | -0.013 | 0.001  | -0.022 | -0.018 | -0.031 | -0.004 | -0.013 |
| B3LYP-D3      | -0.346 | -0.406 | -0.046 | -0.081 | -0.406 | -0.406 | -0.406 | -0.047 | 0.029  | -0.076 | -0.639 | -0.465 | -0.077 | 0.071  | -0.346 | -0.119 | -0.736 | -0.160 | -0.412 | -0.369 |
|               | -0.221 | -0.028 | -0.559 | -0.350 | -0.151 | -0.109 | -0.034 | 0.051  | 0.024  | -0.372 | -0.391 | -0.153 | 0.019  | -0.164 | -0.002 | -0.047 | 0.013  | -0.063 | -0.375 | -0.155 |
|               | 0.017  | -0.151 | -0.065 | 0.013  | -0.035 | -0.098 | -0.035 | -0.047 | -0.120 | 0.023  | -0.418 | -0.026 | -0.033 | -0.051 | -0.032 | -0.044 | -0.055 | -0.067 | -0.066 | -0.128 |
| PBE1PBE-D3    | -0.314 | -0.372 | -0.046 | -0.076 | -0.372 | -0.372 | -0.372 | -0.046 | 0.005  | -0.079 | -0.603 | -0.457 | -0.066 | 0.011  | -0.332 | -0.090 | -0.707 | -0.112 | -0.348 | -0.295 |
|               | -0.202 | -0.056 | -0.524 | -0.331 | -0.138 | -0.083 | -0.032 | -0.017 | -0.013 | -0.352 | -0.367 | -0.145 | -0.069 | -0.153 | -0.073 | -0.044 | -0.023 | -0.054 | -0.355 | -0.147 |
|               | -0.070 | -0.148 | -0.057 | -0.025 | -0.083 | -0.128 | -0.078 | -0.088 | -0.138 | -0.023 | -0.393 | -0.062 | -0.084 | -0.082 | -0.066 | -0.090 | -0.086 | -0.097 | -0.119 | -0.134 |
| LC-wPBE-D3    | -0.293 | -0.344 | 0.057  | 0.031  | -0.344 | -0.344 | -0.344 | 0.057  | 0.170  | 0.041  | -0.572 | -0.375 | 0.033  | 0.204  | -0.318 | 0.000  | -0.727 | -0.069 | -0.315 | -0.204 |
|               | -0.147 | 0.147  | -0.512 | -0.294 | -0.077 | 0.021  | 0.094  | 0.161  | 0.171  | -0.319 | -0.335 | -0.063 | 0.092  | -0.069 | 0.090  | 0.090  | 0.167  | 0.077  | -0.322 | -0.065 |
|               | 0.091  | -0.054 | 0.077  | 0.166  | 0.101  | 0.036  | 0.086  | 0.096  | 0.009  | 0.158  | -0.363 | 0.115  | 0.115  | 0.143  | 0.112  | 0.111  | 0.138  | 0.151  | 0.153  | 0.144  |
| PBEPBE-D3BJ   | -0.331 | -0.390 | -0.070 | -0.101 | -0.390 | -0.390 | -0.390 | -0.071 | -0.019 | -0.091 | -0.622 | -0.467 | -0.096 | 0.000  | -0.354 | -0.123 | -0.708 | -0.070 | -0.294 | -0.287 |
|               | -0.224 | -0.063 | -0.550 | -0.350 | -0.155 | -0.106 | -0.048 | -0.026 | -0.019 | -0.372 | -0.388 | -0.157 | -0.070 | -0.169 | -0.076 | -0.061 | -0.031 | -0.074 | -0.375 | -0.160 |
|               | -0.074 | -0.161 | -0.075 | -0.031 | -0.085 | -0.117 | -0.084 | -0.090 | -0.123 | -0.033 | -0.415 | -0.070 | -0.091 | -0.091 | -0.075 | -0.097 | -0.096 | -0.111 | -0.108 | -0.154 |
| TPSSTPSS-D3BJ | -0.214 | -0.264 | 0.057  | 0.041  | -0.264 | -0.264 | -0.264 | 0.056  | 0.089  | 0.043  | -0.540 | -0.385 | 0.020  | 0.124  | -0.219 | 0.033  | -0.624 | -0.011 | -0.265 | -0.275 |
|               | -0.110 | 0.061  | -0.466 | -0.227 | -0.065 | 0.025  | 0.058  | 0.088  | 0.095  | -0.267 | -0.281 | -0.016 | 0.055  | -0.022 | 0.052  | 0.051  | 0.088  | 0.044  | -0.270 | -0.019 |
|               | 0.052  | -0.022 | 0.043  | 0.088  | 0.058  | 0.015  | 0.048  | 0.055  | 0.014  | 0.084  | -0.313 | 0.060  | 0.040  | 0.062  | 0.057  | 0.036  | 0.059  | 0.039  | -0.021 | -0.033 |
| B3LYP-D3BJ    | -0.303 | -0.373 | 0.017  | -0.014 | -0.373 | -0.373 | -0.373 | 0.016  | 0.168  | 0.104  | -0.617 | -0.441 | -0.024 | 0.259  | -0.302 | -0.059 | -0.709 | -0.027 | -0.294 | -0.233 |
|               | -0.171 | 0.144  | -0.551 | -0.313 | -0.106 | -0.049 | 0.026  | 0.151  | 0.191  | -0.334 | -0.365 | -0.104 | 0.113  | -0.126 | 0.111  | 0.015  | 0.158  | -0.005 | -0.337 | -0.107 |
|               | 0.111  | -0.117 | -0.007 | 0.156  | 0.095  | 0.051  | 0.105  | 0.089  | 0.013  | 0.144  | -0.398 | 0.115  | 0.125  | 0.101  | 0.112  | 0.044  | 0.044  | 0.061  | 0.406  | 0.358  |
| PBE1PBE-D3BJ  | -0.288 | -0.350 | -0.026 | -0.049 | -0.350 | -0.350 | -0.350 | -0.027 | 0.024  | -0.050 | -0.590 | -0.448 | -0.047 | 0.031  | -0.313 | -0.067 | -0.688 | -0.031 | -0.239 | -0.228 |
|               | -0.177 | -0.026 | -0.517 | -0.310 | -0.118 | -0.063 | -0.010 | 0.016  | 0.011  | -0.332 | -0.350 | -0.118 | -0.028 | -0.129 | -0.034 | -0.020 | 0.004  | -0.032 |        |        |

## Reference

[S1] Frisch, M.J.; Trucks, G.W.; Schlegel, H.B.; Scuseria, G.E.; Robb, M.A.; Cheeseman, J.R.; Scalmani, G.; Barone, V.; Mennucci, B.; Petersson, G.A.; Nakatsuji, H.; Caricato, M.; Li, X.; Hratchian, H.P.; Izmaylov, A.F.; Bloino, J.; Zheng, G.; Sonnenberg, J.L.; Hada, M.; Ehara, M.; Toyota, K.; Fukuda, R.; Hasegawa, J.; Ishida, M.; Nakajima, T.; Honda, Y.; Kitao, O.; Nakai, H.; Vreven, T.; Montgomery, J.A., Jr.; Peralta, J.E.; Ogliaro, F.; Bearpark, M.; Heyd, J.J.; Brothers, E.; Kudin, K.N.; Staroverov, V.N.; Kobayashi, R.; Normand, J.; Raghavachari, K.; Rendell, A.; Burant, J.C.; Iyengar, S.S.; Tomasi, J.; Cossi, M.; Rega, N.; Millam, J.M.; Klene, M.; Knox, J.E.; Cross, J.B.; Bakken, V.; Adamo, C.; Jaramillo, J.; Gomperts, R.; Stratmann, R.E.; Yazyev, O.; Austin, A.J.; Cammi, R.; Pomelli, C.; Ochterski, J.W.; Martin, R.L.; Morokuma, K.; Zakrzewski, V.G.; Voth, G.A.; Salvador, P.; Dannenberg, J.J.; Dapprich, S.; Daniels, A.D.; Farkas, O.; Foresman, J.B.; Ortiz, J.V.; Cioslowski, J.; Fox, D.J. *Gaussian 09*, Revision A.01; Gaussian, Inc.: Wallingford CT, USA, 2009.
